# Supplementary material for: Pervasive transcription read-through promotes aberrant expression of oncogenes and RNA chimeras in renal carcinoma
Source: eLife journal article supplement (doi:10.7554/elife.09214), 2015-11-17
Supplement: figures [file elife-09214-figures-v2.pdf]

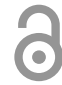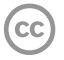

---

## Figures and figure supplements

Pervasive transcription read-through promotes aberrant expression of oncogenes and RNA chimeras in renal carcinoma

**Ana R Grosso et al**

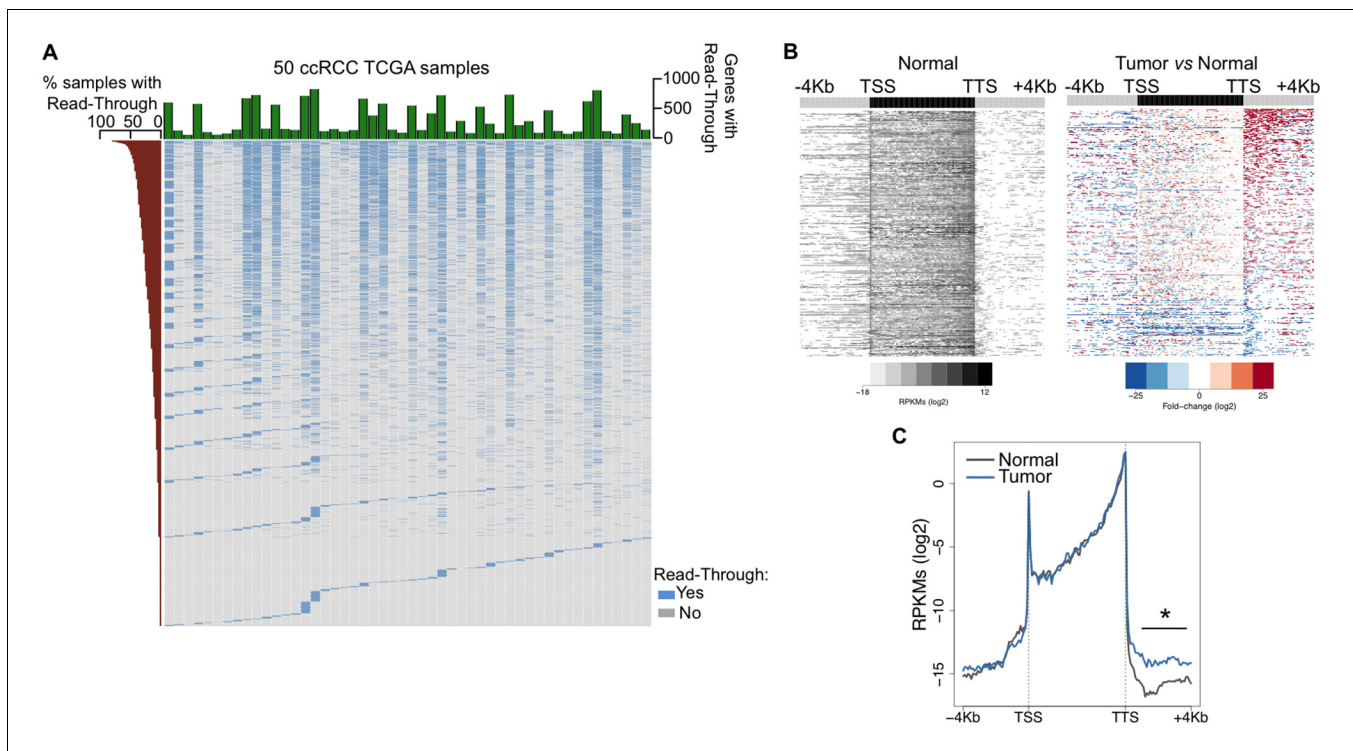

**Figure 1.** Transcription read-through is prevalent in ccRCC. (A) Top graph depicts the number of genes with transcription read-through per ccRCC sample. The heatmap illustrates the genes with (blue) and without (grey) transcription read-through. The left graph indicates the percentage of samples on which read-through is observed for each individual gene. ( $n = 50$  tumor/matched normal ccRCC TCGA samples). (B) Heatmap representation of the RNA-seq profile distribution and fold change after the TTS region of genes with transcription read-through in one representative TCGA ccRCC sample (patient barcode TCGA-CZ-5465) of a total of 50 tumor and matched pairs analysed. The gene body region was scaled to 60 equally sized bins and  $\pm 4$  Kb gene-flanking regions were averaged in 100-bp windows. The left panel shows the read counts (log2 RPKMs) of the matched normal tissue in all genes with read-through and the right panel shows the fold-change (log2) of read counts between the tumor and the matched normal tissue. Genes are ordered according to the read-through length. Scales and colour keys for each panel are depicted in the bottom. (C) Metagenesis analysis of RNA-seq profiles for tumor and matched normal tissue from one ccRCC patient. \* $p < 0.05$  by Student's T-test.

DOI: <http://dx.doi.org/10.7554/eLife.09214.003>

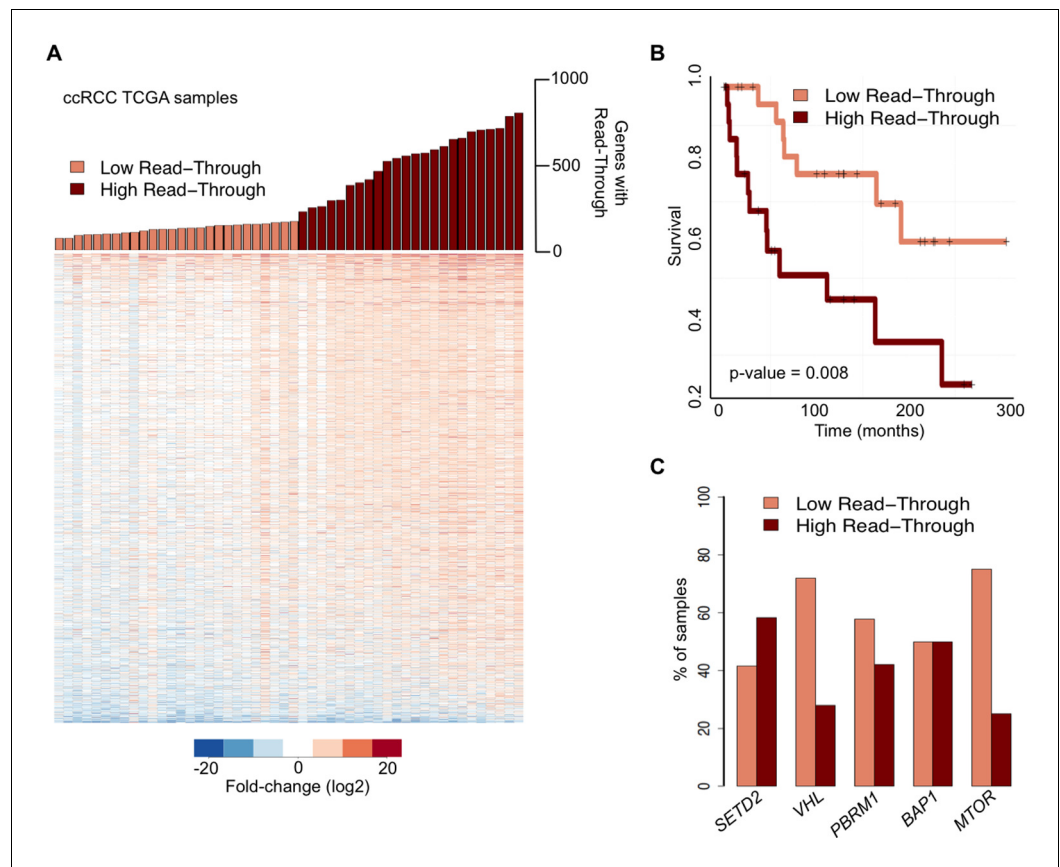

**Figure 2.** Transcription read-through correlates with ccRCC survival rates. (A) The top graph indicates the number of genes with transcription read-through on each ccRCC patient sample. Samples were split in two groups according to the number of genes with transcription read-through (low or high), using 200 genes as a cut-off. The heatmap represents the RNA-seq tumor/matched normal fold change 4 Kb after the TTS region of genes with transcription read-through. (B) Kaplan-Meier plot comparing the survival of patients separated into 'high read-through' and 'low read-through' subsets as defined in A. (C) Proportion of ccRCC patient samples with low and high transcription read-through. Results are shown for samples containing any of the most recurrently mutated genes in ccRCC: *SETD2*, *VHL*, *PBRM1*, *BAP1* and *MTOR*. Proportions of high and low read-through were significantly different between samples carrying mutation in *SETD2* and in any of the remaining genes (Fisher's Exact Test  $p < 0.05$ ).

DOI: <http://dx.doi.org/10.7554/eLife.09214.004>

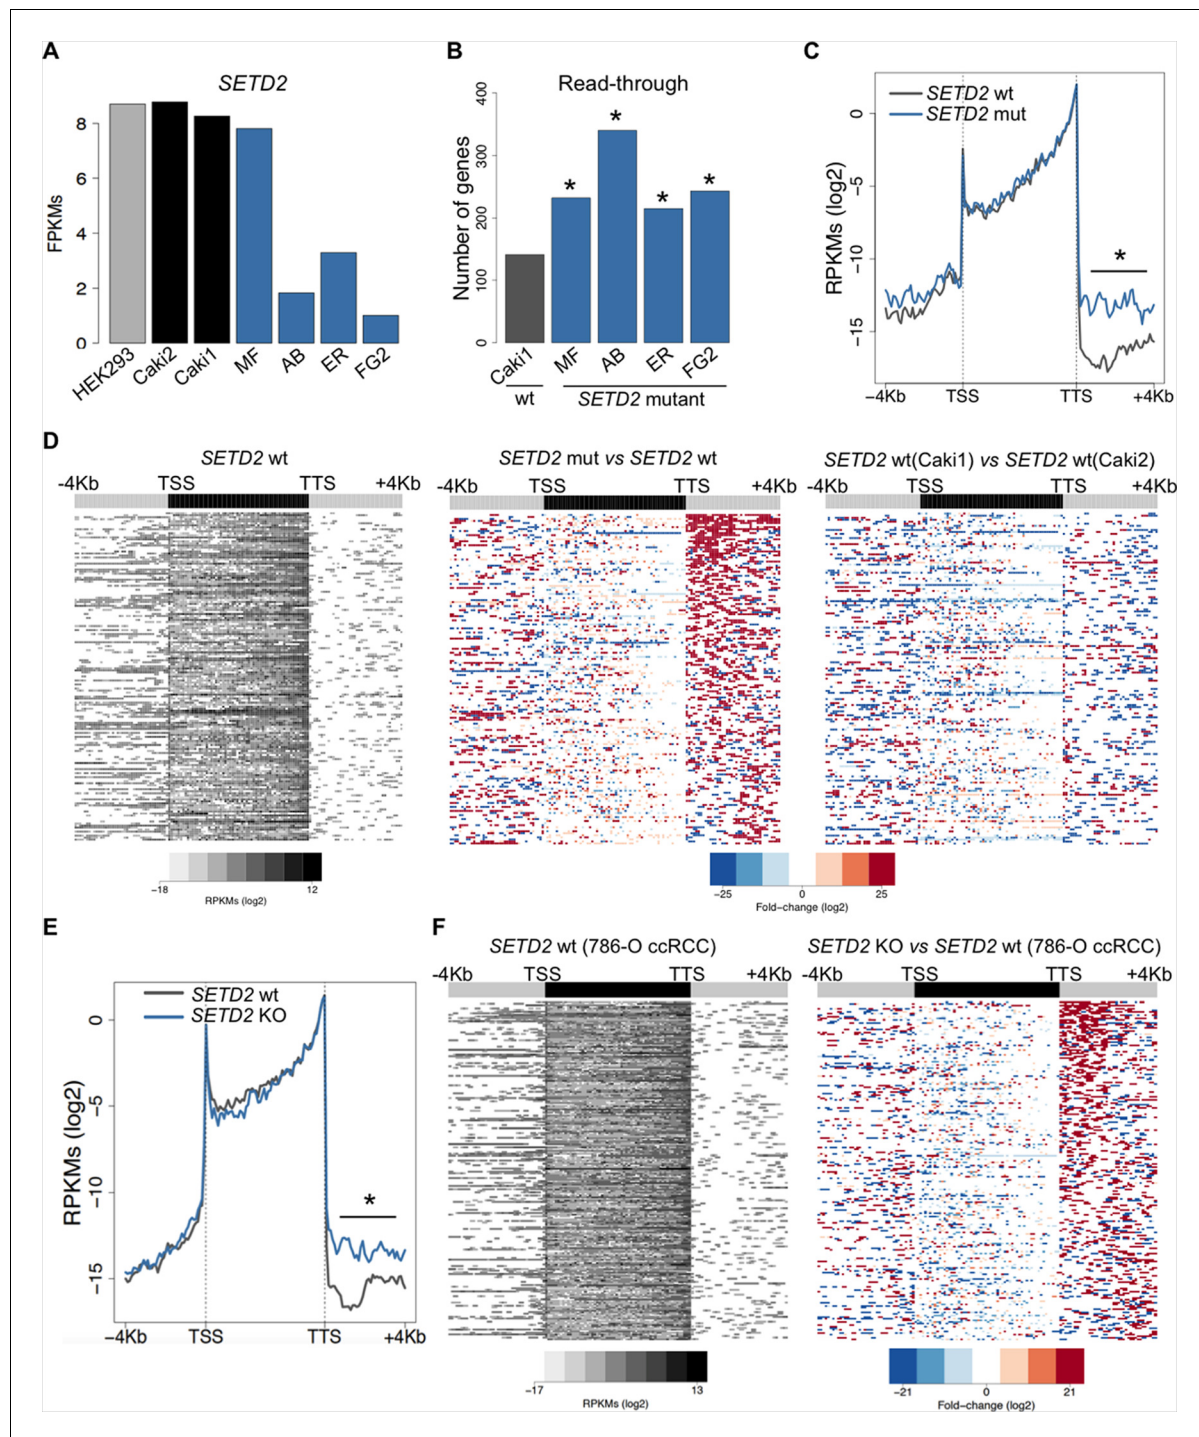

**Figure 3.** *SETD2* mutations promote transcription read-through in ccRCC. (A) *SETD2* expression levels (FPKMs) in HEK293 and ccRCC cell lines. (B) Number of genes with transcription read-through up to 4 Kb downstream the TTS. \* $p < 0.05$  by Fisher's Exact Test after comparing each *SETD2* mutant cell line with the *SETD2* wt cell line (Caki1); (C) Metagenesis analysis of genes showing transcription read-through in *SETD2* mutant and wt ccRCC cell lines. The gene body region was scaled to 60 equally sized bins and  $\pm 4$  Kb gene-flanking regions were averaged in 100-bp windows. \* $p < 0.05$  by Student's T-test; (D) Heatmap representation of RNA-seq profile distribution and fold change after the TTS region of genes showing transcription read-through. Genes were scaled and averaged as in C. The left panel shows the read counts (log2 RPKMs) of the *SETD2* wt cell line (Caki2) in all genes with read-through. The two right panels show the fold-change (log2) between each ccRCC cell line and the reference *SETD2* wt ccRCC cell line (Caki2). Genes are ordered according to the read-through length. Scales and colour keys for each panel are depicted at the bottom of the panel. (E) Metagenesis analysis of genes showing transcription read-through in *SETD2* mutant and wt ccRCC cell lines. The line graph shows RPKMs (log2) from -4Kb to +4Kb. The *SETD2* wt (black line) shows a sharp peak at the TTS, while the *SETD2* KO (blue line) shows a broader peak. Asterisks indicate  $p < 0.05$ . (F) Heatmap representation of RNA-seq profile distribution and fold change after the TTS region of genes showing transcription read-through. The left panel shows the read counts (log2 RPKMs) of the *SETD2* wt (786-O ccRCC) in all genes with read-through. The right panel shows the fold-change (log2) between each ccRCC cell line and the reference *SETD2* wt ccRCC cell line (786-O). Genes are ordered according to the read-through length. Scales and colour keys for each panel are depicted at the bottom of the panel.

*Figure 3 continued*

analysis (as detailed in **C**) of genes showing transcription read-through in *SETD2* KO and wt 786-O ccRCC cells. \* $p < 0.05$  by Student's T-test. (F) Analysis as described in **D** of RNA-seq data from *SETD2* KO and control 786-O ccRCC cell lines.

DOI: <http://dx.doi.org/10.7554/eLife.09214.005>

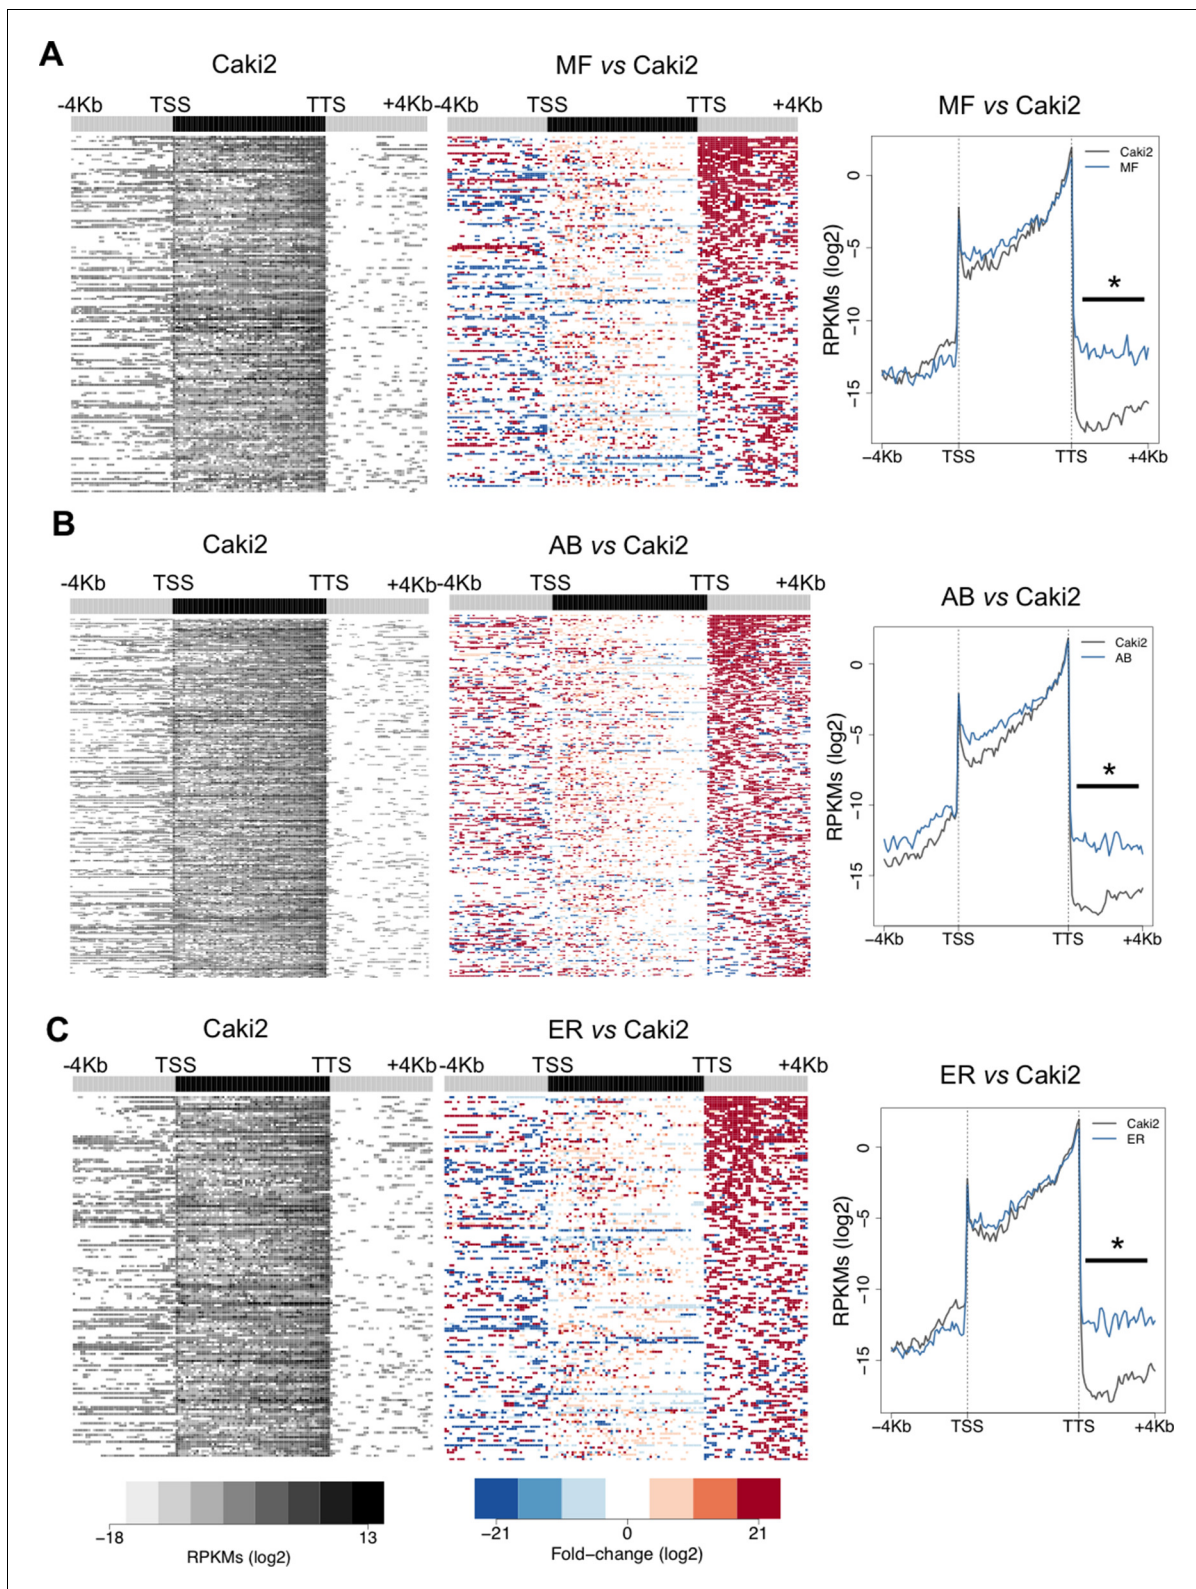

**Figure 3—figure supplement 1.** SETD2 mutations in ccRCC cells promote transcription read-through. Heatmap and metagene of RNA-seq profiles for the following *SETD2* mutant ccRCC cell lines: MF (A), AB (B) and ER (C). Heatmap representation of RNA-seq profile distribution and fold change after the TTS of genes with transcription read-through. Gene body was scaled to 60 equally sized bins and  $\pm 4$  Kb gene flanking regions were averaged in 100-bp window. Genes are ordered according to the length of the read-through. Left panel shows read counts (log<sub>2</sub> RPKMs) of the *SETD2* wt cell line. Figure 3—figure supplement 1 continued on next page

*Figure 3—figure supplement 1 continued*

(Caki2) in all genes with read-through. The right panel shows the fold-change (log2) for *SETD2* mutant vs *SETD2* wt (Caki2) ccRCC cell lines. Metagene of RNA-seq profiles for *SETD2* mutant and wt ccRCC cell line of genes showing transcription read-through. \*p-value <0.05 by Student's T-test. Scales and color keys for each panel are depicted at the bottom of the panel.

DOI: <http://dx.doi.org/10.7554/eLife.09214.006>

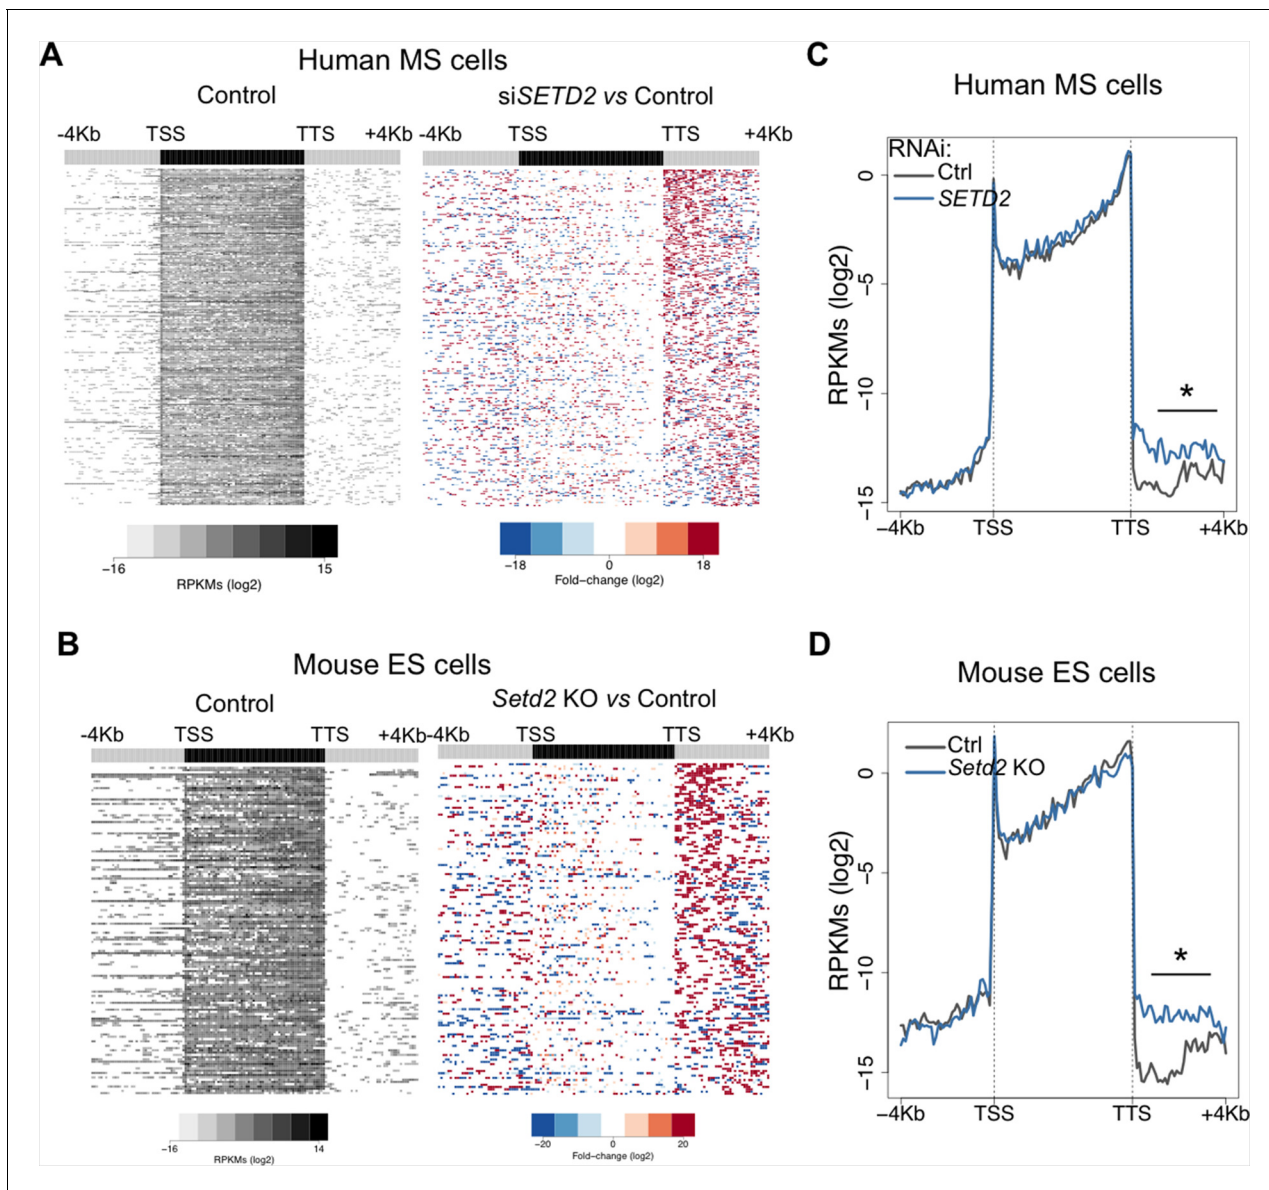

**Figure 3—figure supplement 2.** SETD2-depletion impairs transcription termination. (A,B) Heatmap representation of RNA-seq profile distribution and fold change after the TTS region of genes showing transcription read-through. The left panel shows the read counts (log2 RPKMs) of all genes with read-through in control cells. The two right panels show the fold-change (log2) between *SETD2*-depleted and control human MS cells (A) and *Setd2* KO and wt mouse ES cells (B). Genes are ordered according to the read-through length. Scales and colour keys for each panel are depicted at the bottom of the panel. (C,D) Metagenesis analyses of RNA-seq profiles of control and *SETD2*-depleted human MS cells (C) and of *Setd2* KO and wt mouse ES cells (D). \*p-value <0.05 by Student's T-test.

DOI: <http://dx.doi.org/10.7554/eLife.09214.007>

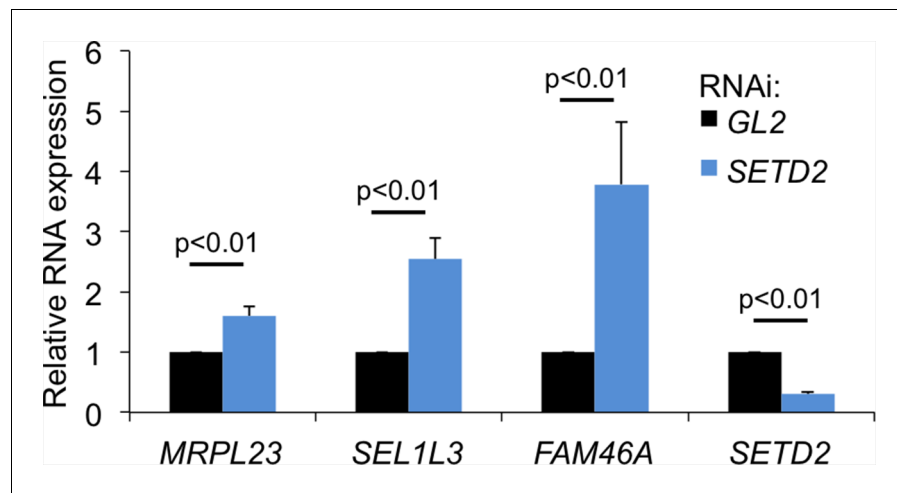

**Figure 3—figure supplement 3.** SETD2-depletion impairs transcription termination in ccRCC cells. Caki2 cells were transfected with siRNA oligos against *SETD2* or the firefly luciferase (*GL2*) (control) 48 hr before RNA extraction. RT-qPCR was carried out with primers designed to detect transcription read-through in *MRPL23*, *SEL1L3* and *FAM46A*. The levels of *SETD2* mRNA expression are also shown. The amount of PCR product estimated by RT-qPCR was normalized to the levels of U6 snRNA.

DOI: <http://dx.doi.org/10.7554/eLife.09214.008>

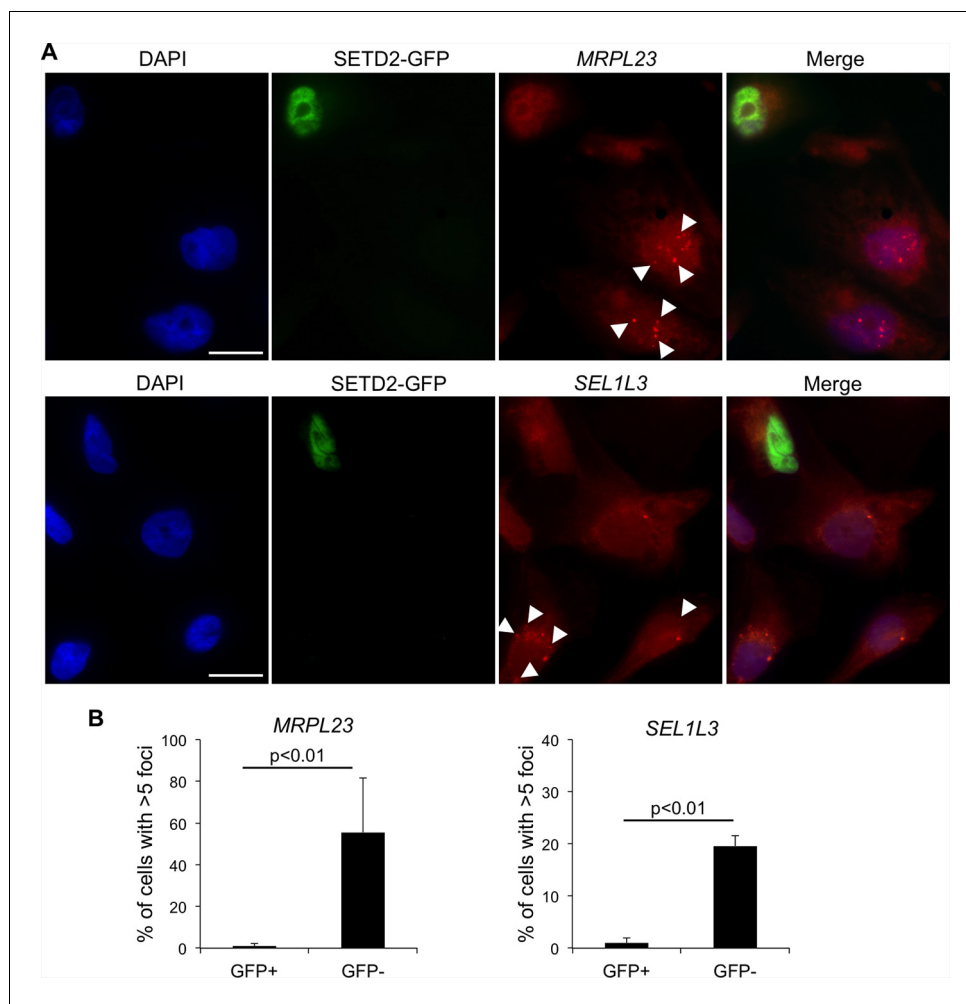

**Figure 4.** SETD2 rescues the transcription termination defects of SETD2 mutant ccRCC cells. **(A)** RNA FISH experiments on a *SETD2*-mutant ccRCC cell line (FG2) transiently expressing wt SETD2-GFP. Quasar570-labeled probes were designed against a region downstream the termination sites of *MRPL23* and *SEL1L3*. The arrows indicate single RNA transcripts generated by a transcription read-through event. **(B)** Quantification of the number of GFP-negative and GFP-positive cells containing more than 5 RNA FISH foci. Means and standard deviations from at least 50 cells from four individual experiments are shown. Scale bars: 10  $\mu$ m.  $p < 0.01$  by Student's T-test. DOI: <http://dx.doi.org/10.7554/eLife.09214.009>

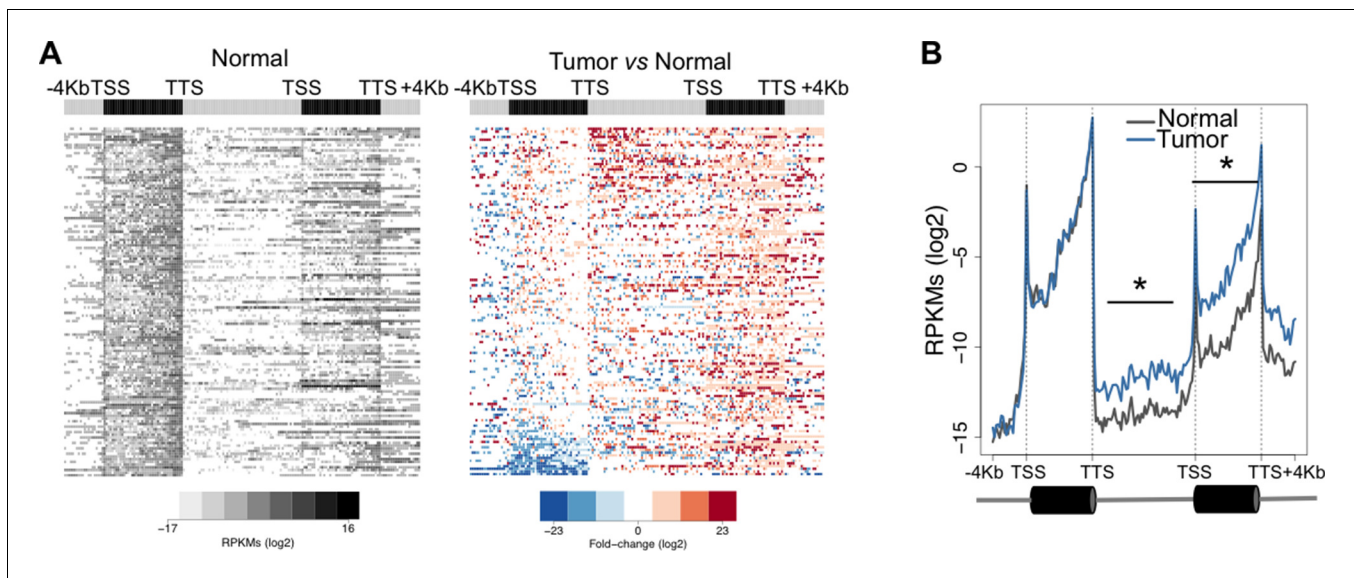

**Figure 5.** Transcription read-through overruns and interferes with the expression of neighbouring genes. Heatmap (A) and metagene (B) profiles of the intergenic region and of the gene located downstream of a read-through event in one representative ccRCC TCGA sample (patient barcode TCGA-CZ-5465). Genes were scaled and averaged as in **Figure 1**. \* $p < 0.05$  by Student's T-test.

DOI: <http://dx.doi.org/10.7554/eLife.09214.010>

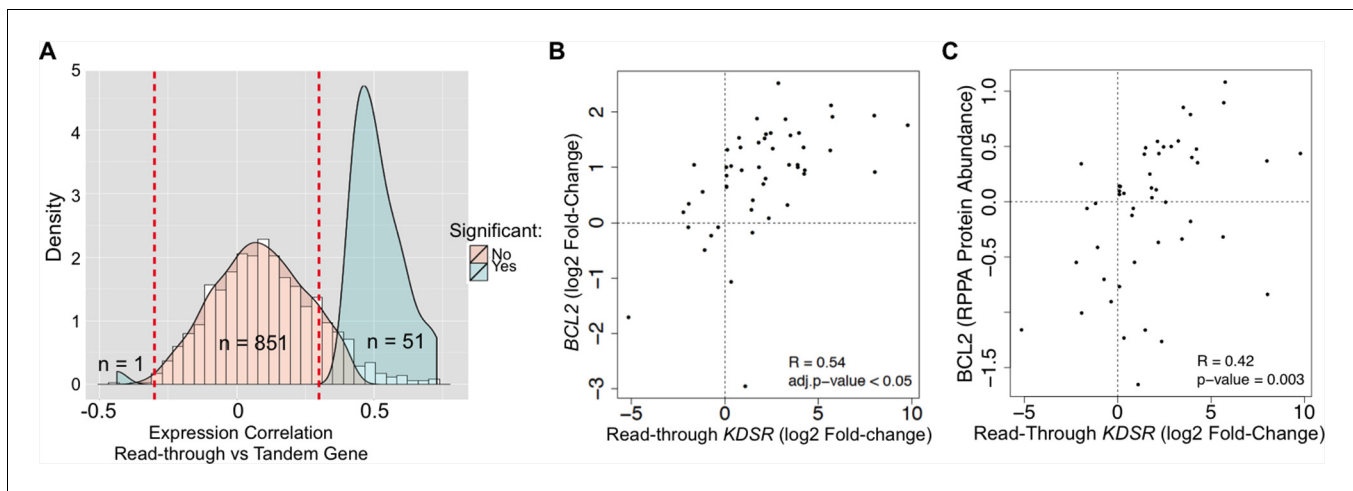

**Figure 6.** Transcription read-through of the *KDSR* gene correlates with the expression of the *BCL2* oncogene. (A) Distribution of the correlation between the read-through and the expression levels of the downstream tandem genes. Significant correlation values (Benjamini-Hochberg adjusted  $p < 0.05$ ) are represented in blue. (B) Correlation between the expression levels of *BCL2* and the read-through of the upstream *KDSR* gene. The graph depicts the fold-change of read counts for each tumor and matched normal pair. (C) Correlation between *BCL2* protein levels and the *KDSR* read-through.

DOI: <http://dx.doi.org/10.7554/eLife.09214.011>

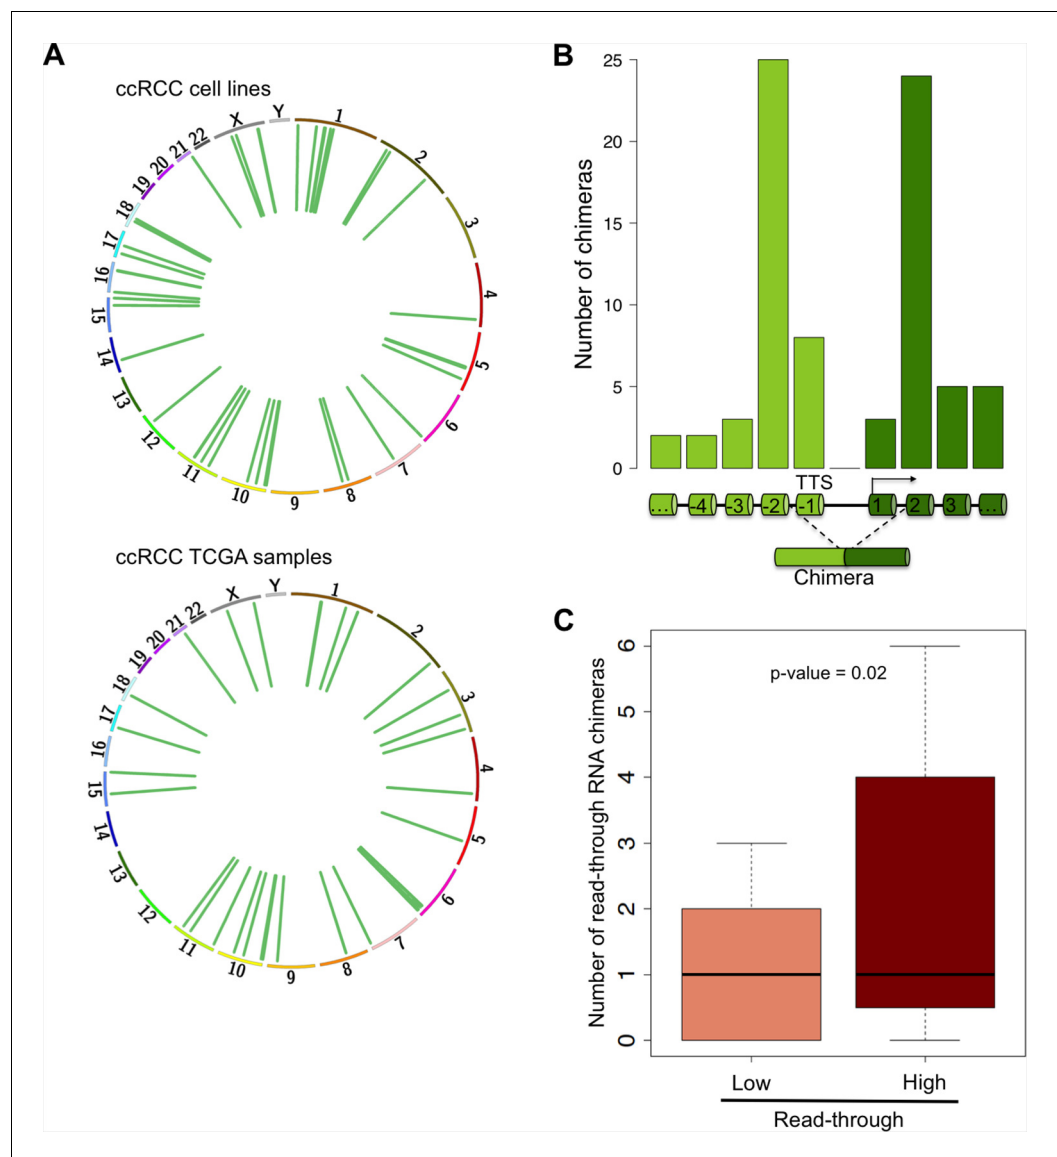

**Figure 7.** Read-through RNA chimeras are prevalent in ccRCC. (A) Circos plots showing the location of genes forming each RNA chimera detected on human ccRCC cell lines and TCGA samples. Chimeras are represented by curves inside the Circos. (B) Number of read-through RNA chimeras formed by intergenic splicing between the represented exons. (C) Number of read-through RNA chimeras in the low and high read-through sample subsets defined in **Figure 2A**.

DOI: <http://dx.doi.org/10.7554/eLife.09214.012>

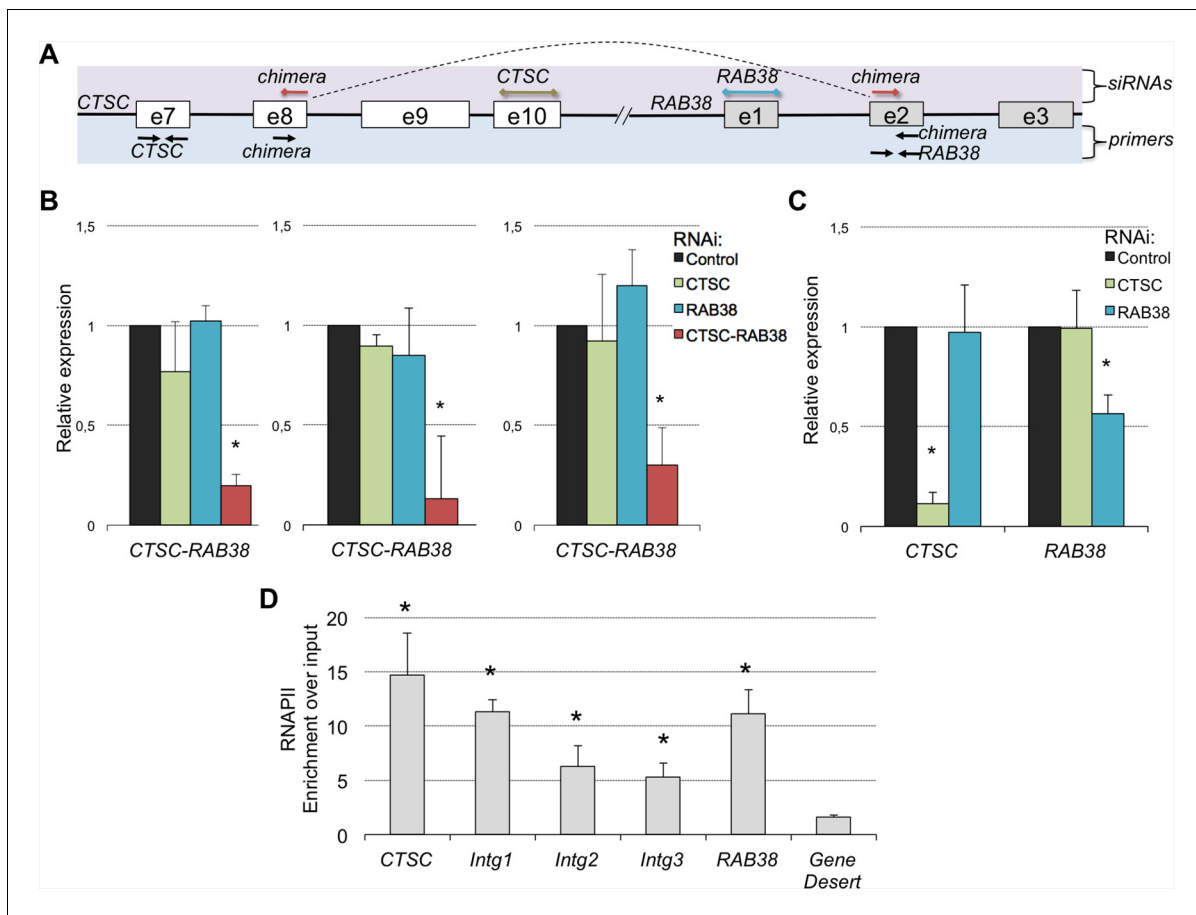

**Figure 8.** The *CTSC-RAB38* chimera is recurrently detected in ccRCC. **(A)** Schematic illustration of the *CTSC-RAB38* locus depicting the position of the primers used to measure the transcripts levels by RT-qPCR shown in **(B)** and **(C)** and the position of the siRNAs targeting each of the three transcripts (*CTSC*, *RAB38* and the *CTSC-RAB38* chimera). The dashed curve in the scheme illustrates the splicing pattern of the chimeric transcript. **(B)** Relative expression of the *CTSC-RAB38* chimeric transcript after depletion of the indicated transcripts by RNAi in three distinct ccRCC cell lines (FG2, MF, ER). **(C)** Relative expression of *CTSC* and *RAB38* upon depletion of the indicated transcripts by RNAi in FG2 cells. Similar results were obtained with the other ccRCC cell lines. \* $p < 0.05$  by Student's T-test compared to controls. **(D)** RNAPII ChIP along the *CTSC-RAB38* locus in FG2 cells. Means and standard deviations from five independent experiments are shown. \* $p < 0.05$  by Student's T-test compared to the gene desert.

DOI: <http://dx.doi.org/10.7554/eLife.09214.013>
