# Supplementary material for: Pervasive transcription read-through promotes aberrant expression of oncogenes and RNA chimeras in renal carcinoma
Source: eLife. 2015 Nov 17;4:e09214. doi: 10.7554/eLife.09214 (PMC4744188; doi:10.7554/eLife.09214)
Supplement: Supplementary file 1. — (A) Genes with transcription read-through identified in human ccRCC TCGA samples. (B) Genes involved in transcription termination and pre-mRNA processing with mutations in TCGA samples. (C) Genes with transcription read-through identified in human ccRCC cell lines. (D) Genes with transcription read-through identified in human 786-O ccRCC cells. (E) Genes with transcription read-through identified in human mesenchymal stem cells. (F) Genes with transcription read-through identified in mouse embryonic stem cells. (G) Genes with transcription read-through identified in human ccRCC TCGA samples, showing significant correlation between read-through levels and expression of downstream gene. (H). Read-Through RNA chimeras identified in human ccRCC TCGA samples and ccRCC cell lines. (I). siRNAs and Primer Sequences. (J) Sequences of RNA FISH probes. DOI: http://dx.doi.org/10.7554/eLife.09214.014 [file elife-09214-supp1.xlsx]

## Sheet: A
SampleID	Sample_SETD2_genotype	Sample_Read-Through_Level	geneName	Chrom	lxStart	lxEnd	Strand	Downstream_Tandem_Gene	Expression_Interfered
TCGA-B0-4712	mutated	high RT	ABCD4	chr14	74751979	74769767	-
TCGA-B0-4712	mutated	high RT	ABCF2	chr7	150904922	150924460	-	IQCA1L	no
TCGA-B0-4712	mutated	high RT	ACACB	chr12	109577201	109706030	+
TCGA-B0-4712	mutated	high RT	ACSL4	chrX	108884563	108976621	-	KCNE1L	no
TCGA-B0-4712	mutated	high RT	ACSS1	chr20	24986865	25038818	-	APMAP
TCGA-B0-4712	mutated	high RT	ACTR2	chr2	65454828	65498390	+
TCGA-B0-4712	mutated	high RT	ACVR1B	chr12	52345450	52390863	+	GRASP	yes
TCGA-B0-4712	mutated	high RT	AES	chr19	3052907	3062964	-	TLE2	no
TCGA-B0-4712	mutated	high RT	AGL	chr1	100315639	100389579	+	SLC35A3	no
TCGA-B0-4712	mutated	high RT	AHCTF1	chr1	247002401	247094726	-
TCGA-B0-4712	mutated	high RT	AHCYL1	chr1	110527386	110566364	+	STRIP1
TCGA-B0-4712	mutated	high RT	AKAP11	chr13	42846288	42897403	+	TNFSF11	yes
TCGA-B0-4712	mutated	high RT	AKR1E2	chr10	4868368	4890251	+
TCGA-B0-4712	mutated	high RT	ALAS1	chr3	52232098	52248343	+
TCGA-B0-4712	mutated	high RT	ALDH1B1	chr9	38392660	38398662	+
TCGA-B0-4712	mutated	high RT	ALDH7A1	chr5	125877532	125931082	-
TCGA-B0-4712	mutated	high RT	ALG10B	chr12	38710556	38723528	+
TCGA-B0-4712	mutated	high RT	ALS2CL	chr3	46710484	46735194	-
TCGA-B0-4712	mutated	high RT	AMPD2	chr1	110162434	110174677	+	GSTM4	no
TCGA-B0-4712	mutated	high RT	AMZ2P1	chr17	62962667	62971703	-	LRRC37A3_2	no
TCGA-B0-4712	mutated	high RT	ANAPC1_2	chr2	112525213	112641741	-	MIR4435-1HG	no
TCGA-B0-4712	mutated	high RT	ANAPC4	chr4	25378847	25420120	+	SLC34A2	no
TCGA-B0-4712	mutated	high RT	ANAPC5	chr12	121746047	121792012	-	CAMKK2	yes
TCGA-B0-4712	mutated	high RT	ANAPC7	chr12	110810704	110841535	-
TCGA-B0-4712	mutated	high RT	ANKRD10	chr13	111530886	111567454	-	LINC00346
TCGA-B0-4712	mutated	high RT	ANKRD46	chr8	101521979	101572014	-
TCGA-B0-4712	mutated	high RT	AP2B1	chr17	33914281	34053436	+	RASL10B	no
TCGA-B0-4712	mutated	high RT	APH1B	chr15	63569748	63601325	+
TCGA-B0-4712	mutated	high RT	API5	chr11	43333504	43366080	+	TTC17	no
TCGA-B0-4712	mutated	high RT	APOL4	chr22	36585175	36600879	-	APOL3	yes
TCGA-B0-4712	mutated	high RT	APOL6	chr22	36044423	36064456	+	APOL5	yes
TCGA-B0-4712	mutated	high RT	APPBP2	chr17	58520509	58603601	-
TCGA-B0-4712	mutated	high RT	AQP1	chr7	30951414	30965131	+	GHRHR	no
TCGA-B0-4712	mutated	high RT	AQP3	chr9	33441151	33447631	-	AQP7	no
TCGA-B0-4712	mutated	high RT	AQP6	chr12	50366619	50370922	+
TCGA-B0-4712	mutated	high RT	ARC	chr8	143692404	143695833	-
TCGA-B0-4712	mutated	high RT	ARFGAP3	chr22	43192531	43253408	-	CS330190	no
TCGA-B0-4712	mutated	high RT	ARHGAP29	chr1	94615402	94740624	-	ABCA4	no
TCGA-B0-4712	mutated	high RT	ARHGEF10L	chr1	17846826	18024370	+	ACTL8	yes
TCGA-B0-4712	mutated	high RT	ARHGEF19	chr1	16524598	16539104	-	EPHA2	no
TCGA-B0-4712	mutated	high RT	ARID1A	chr1	27022521	27108601	+	PIGV	no
TCGA-B0-4712	mutated	high RT	ARMCX1	chrX	100805513	100809675	+
TCGA-B0-4712	mutated	high RT	ARMCX2	chrX	100910267	100914876	-
TCGA-B0-4712	mutated	high RT	ARMCX6	chrX	100870107	100872991	-
TCGA-B0-4712	mutated	high RT	ARPP19	chr15	52839431	52861364	-	MYO5A	no
TCGA-B0-4712	mutated	high RT	ARSA	chr22	51061181	51066601	-
TCGA-B0-4712	mutated	high RT	ARSD	chrX	2822010	2847416	-
TCGA-B0-4712	mutated	high RT	ATP5G1	chr17	46970147	46973232	+	UBE2Z	no
TCGA-B0-4712	mutated	high RT	ATP5G2	chr12	54058943	54070512	-	ATF7	no
TCGA-B0-4712	mutated	high RT	ATP6V1H	chr8	54628102	54755871	-	OPRK1	no
TCGA-B0-4712	mutated	high RT	ATRN	chr20	3451664	3631769	+
TCGA-B0-4712	mutated	high RT	AVPR1A	chr12	63536538	63546590	-	PPM1H	no
TCGA-B0-4712	mutated	high RT	B3GNT7	chr2	232260334	232265875	+
TCGA-B0-4712	mutated	high RT	BCAM	chr19	45312315	45324678	+	PVRL2	no
TCGA-B0-4712	mutated	high RT	BCL2L10	chr15	52401821	52404972	-
TCGA-B0-4712	mutated	high RT	BCLAF1	chr6	136578000	136610989	-	MTFR2
TCGA-B0-4712	mutated	high RT	BCOR	chrX	39910498	40036582	-	LINC01282
TCGA-B0-4712	mutated	high RT	BDKRB1	chr14	96722546	96731100	+
TCGA-B0-4712	mutated	high RT	BDP1	chr5	70751441	70863649	+	MCCC2	no
TCGA-B0-4712	mutated	high RT	BEX4	chrX	102470019	102472128	+
TCGA-B0-4712	mutated	high RT	BLOC1S6	chr15	45879416	45901909	+	SQRDL	yes
TCGA-B0-4712	mutated	high RT	BMF	chr15	40380090	40401085	-
TCGA-B0-4712	mutated	high RT	BMPR2	chr2	203241049	203432474	+	FAM117B	no
TCGA-B0-4712	mutated	high RT	BMS1	chr10	43277953	43330385	+	MIR5100
TCGA-B0-4712	mutated	high RT	BSG	chr19	571276	583493	+	HCN2	no
TCGA-B0-4712	mutated	high RT	BTBD3	chr20	11871370	11907243	+
TCGA-B0-4712	mutated	high RT	BTF3	chr5	72794249	72801448	+
TCGA-B0-4712	mutated	high RT	C10orf88	chr10	124690418	124713919	-
TCGA-B0-4712	mutated	high RT	C14orf64	chr14	98391946	98444461	-	LOC100129345
TCGA-B0-4712	mutated	high RT	C14orf79	chr14	105452615	105461855	+
TCGA-B0-4712	mutated	high RT	C15orf39	chr15	75491232	75504510	+	GOLGA6C	no
TCGA-B0-4712	mutated	high RT	C16orf91	chr16	1469744	1479345	-	UNKL	no
TCGA-B0-4712	mutated	high RT	C19orf12	chr19	30189792	30206696	-
TCGA-B0-4712	mutated	high RT	C1orf52	chr1	85715636	85725355	-	SYDE2	no
TCGA-B0-4712	mutated	high RT	C2CD4A	chr15	62359175	62363116	+
TCGA-B0-4712	mutated	high RT	C2CD4C	chr19	405442	409170	-	THEG	no
TCGA-B0-4712	mutated	high RT	C2CD5	chr12	22601479	22697480	-	ST8SIA1	yes
TCGA-B0-4712	mutated	high RT	C5orf24	chr5	134181369	134195425	+	TXNDC15	no
TCGA-B0-4712	mutated	high RT	C5orf30	chr5	102594441	102614361	+
TCGA-B0-4712	mutated	high RT	C9orf170	chr9	89763558	89774641	+	DAPK1	no
TCGA-B0-4712	mutated	high RT	CALM1	chr14	90863326	90874619	+	LINC00642
TCGA-B0-4712	mutated	high RT	CAMK2N1	chr1	20808883	20812728	-	LINC01141
TCGA-B0-4712	mutated	high RT	CAMLG	chr5	134074169	134087850	+	DDX46	no
TCGA-B0-4712	mutated	high RT	CAPRIN2	chr12	30862485	30907448	-	IPO8	no
TCGA-B0-4712	mutated	high RT	CASC4	chr15	44580908	44707959	+	CTDSPL2	no
TCGA-B0-4712	mutated	high RT	CBX4	chr17	77806954	77813213	-	CBX8	no
TCGA-B0-4712	mutated	high RT	CBX7	chr22	39526778	39548538	-
TCGA-B0-4712	mutated	high RT	CCDC132	chr7	92861652	92990435	+
TCGA-B0-4712	mutated	high RT	CCNG2	chr4	78078356	78091213	+	CXCL13	yes
TCGA-B0-4712	mutated	high RT	CD164	chr6	109687716	109703762	-
TCGA-B0-4712	mutated	high RT	CD46	chr1	207925382	207968861	+
TCGA-B0-4712	mutated	high RT	CDC27	chr17	45195062	45266678	-	ARL17
TCGA-B0-4712	mutated	high RT	CDK5RAP2	chr9	123151146	123342448	-	TRNA_67
TCGA-B0-4712	mutated	high RT	CDV3	chr3	133292433	133309118	+
TCGA-B0-4712	mutated	high RT	CENPV	chr17	16245847	16256812	-
TCGA-B0-4712	mutated	high RT	CEP120	chr5	122680578	122759286	-
TCGA-B0-4712	mutated	high RT	CEP170B	chr14	105331649	105363107	+	PLD4	yes
TCGA-B0-4712	mutated	high RT	CEP350	chr1	179923907	180084015	+	QSOX1	yes
TCGA-B0-4712	mutated	high RT	CHCHD2	chr7	56169265	56174187	-	PHKG1	yes
TCGA-B0-4712	mutated	high RT	CHD1L	chr1	146714290	146767447	+
TCGA-B0-4712	mutated	high RT	CHGB	chr20	5891973	5906005	+
TCGA-B0-4712	mutated	high RT	CKB	chr14	103985994	103989196	-
TCGA-B0-4712	mutated	high RT	CLDN18	chr3	137717657	137752494	+
TCGA-B0-4712	mutated	high RT	CLK1	chr2	201717731	201729467	-
TCGA-B0-4712	mutated	high RT	CMAS	chr12	22199109	22218606	+
TCGA-B0-4712	mutated	high RT	CNEP1R1	chr16	50059116	50070999	+	HEATR3	no
TCGA-B0-4712	mutated	high RT	COG2	chr1	230778201	230829731	+
TCGA-B0-4712	mutated	high RT	CPD	chr17	28705941	28796675	+	GOSR1	no
TCGA-B0-4712	mutated	high RT	CPNE3	chr8	87526655	87573726	+
TCGA-B0-4712	mutated	high RT	CREM	chr10	35415768	35501886	+	CCNY	no
TCGA-B0-4712	mutated	high RT	CTR9	chr11	10772810	10801290	+
TCGA-B0-4712	mutated	high RT	CTTNBP2	chr7	117350705	117513561	-
TCGA-B0-4712	mutated	high RT	CUL3	chr2	225334866	225450114	-	FAM124B	no
TCGA-B0-4712	mutated	high RT	CX3CL1	chr16	57406413	57418956	+	CCL17	yes
TCGA-B0-4712	mutated	high RT	CXCL12	chr10	44865600	44880545	-
TCGA-B0-4712	mutated	high RT	CXCL14	chr5	134906370	134914969	-	NEUROG1
TCGA-B0-4712	mutated	high RT	CXCL6	chr4	74702272	74704477	+	PF4V1	yes
TCGA-B0-4712	mutated	high RT	CYCS	chr7	25158269	25164980	-	OSBPL3	no
TCGA-B0-4712	mutated	high RT	CYP24A1	chr20	52769987	52790516	-	BCAS1	no
TCGA-B0-4712	mutated	high RT	DAPK1	chr9	90112142	90323549	+	CTSL1	yes
TCGA-B0-4712	mutated	high RT	DBR1	chr3	137879829	137893791	-	A4GNT	no
TCGA-B0-4712	mutated	high RT	DBT	chr1	100652477	100715409	-	LRRC39	yes
TCGA-B0-4712	mutated	high RT	DCAF12L1	chrX	125683365	125686842	-	DCAF12L2	no
TCGA-B0-4712	mutated	high RT	DCUN1D5	chr11	102921412	102962944	-	MMP13	yes
TCGA-B0-4712	mutated	high RT	DDX18	chr2	118572254	118589953	+
TCGA-B0-4712	mutated	high RT	DDX3X	chrX	41192650	41209524	+	NYX	yes
TCGA-B0-4712	mutated	high RT	DDX3Y	chrY	15016018	15032390	+
TCGA-B0-4712	mutated	high RT	DDX46	chr5	134094423	134166826	+	C5orf24	no
TCGA-B0-4712	mutated	high RT	DDX6	chr11	118618472	118661972	-	TREH	no
TCGA-B0-4712	mutated	high RT	DDX60	chr4	169137441	169239958	-
TCGA-B0-4712	mutated	high RT	DDX60L	chr4	169277885	169401665	-	DDX60	no
TCGA-B0-4712	mutated	high RT	DHX9	chr1	182808438	182857117	+
TCGA-B0-4712	mutated	high RT	DIEXF	chr1	210001311	210030910	+	SYT14	no
TCGA-B0-4712	mutated	high RT	DMKN	chr19	35988118	36004560	-	KRTDAP	no
TCGA-B0-4712	mutated	high RT	DNAH5	chr5	13690436	13944589	-
TCGA-B0-4712	mutated	high RT	DNAJA2	chr16	46989273	47007625	-
TCGA-B0-4712	mutated	high RT	DPY19L2	chr12	63952692	64062354	-	AVPR1A	no
TCGA-B0-4712	mutated	high RT	DPY19L4	chr8	95732102	95806076	+	INTS8	yes
TCGA-B0-4712	mutated	high RT	DUSP12	chr1	161719580	161726952	+	ATF6	no
TCGA-B0-4712	mutated	high RT	DUSP5	chr10	112257624	112271302	+	SMC3	no
TCGA-B0-4712	mutated	high RT	DUSP9	chrX	152907896	152916781	+
TCGA-B0-4712	mutated	high RT	DUT	chr15	48623620	48635570	+
TCGA-B0-4712	mutated	high RT	DYNC1I2	chr2	172543918	172606668	+
TCGA-B0-4712	mutated	high RT	DYNC2H1	chr11	102980159	103350591	+	MIR4693
TCGA-B0-4712	mutated	high RT	EDEM1	chr3	5229330	5261650	+
TCGA-B0-4712	mutated	high RT	EFNB2	chr13	107142078	107187388	-
TCGA-B0-4712	mutated	high RT	EFR3A	chr8	132916355	133025886	+
TCGA-B0-4712	mutated	high RT	EGR3	chr8	22545173	22550815	-	BIN3	no
TCGA-B0-4712	mutated	high RT	EHF	chr11	34642587	34684834	+
TCGA-B0-4712	mutated	high RT	EIF2S2	chr20	32676114	32700085	-
TCGA-B0-4712	mutated	high RT	EIF4G3	chr1	21132784	21503381	-	HP1BP3	no
TCGA-B0-4712	mutated	high RT	ELAVL1	chr19	8023456	8070529	-	TIMM44	no
TCGA-B0-4712	mutated	high RT	ELK4	chr1	205577070	205602000	-
TCGA-B0-4712	mutated	high RT	ELMOD2	chr4	141445311	141474924	+
TCGA-B0-4712	mutated	high RT	ELP3	chr8	27947747	28048669	+	PNOC	no
TCGA-B0-4712	mutated	high RT	ENPP2	chr8	120569316	120651106	-
TCGA-B0-4712	mutated	high RT	EOGT	chr3	69024362	69063045	-	FAM19A4	no
TCGA-B0-4712	mutated	high RT	EPB41L5	chr2	120770603	120936697	+
TCGA-B0-4712	mutated	high RT	EPG5	chr18	43427573	43547305	-
TCGA-B0-4712	mutated	high RT	EPHA2	chr1	16450831	16482582	-	FAM131C	no
TCGA-B0-4712	mutated	high RT	EPS15	chr1	51819934	51984995	-	TTC39A	yes
TCGA-B0-4712	mutated	high RT	ERCC4	chr16	14014013	14046205	+
TCGA-B0-4712	mutated	high RT	ESYT1	chr12	56521985	56538460	+	MYL6B	yes
TCGA-B0-4712	mutated	high RT	ESYT2	chr7	158523688	158622319	-	NCAPG2	yes
TCGA-B0-4712	mutated	high RT	ETNK1	chr12	22778075	22843608	+	LOC101928441
TCGA-B0-4712	mutated	high RT	EVA1C	chr21	33784744	33887710	+
TCGA-B0-4712	mutated	high RT	FAM109A	chr12	111798454	111806925	-
TCGA-B0-4712	mutated	high RT	FAM124A	chr13	51796469	51858377	+	SERPINE3	no
TCGA-B0-4712	mutated	high RT	FAM193A	chr4	2627158	2734302	+
TCGA-B0-4712	mutated	high RT	FAM199X	chrX	103411155	103440582	+
TCGA-B0-4712	mutated	high RT	FAM200B	chr4	15683351	15692070	+	BST1	yes
TCGA-B0-4712	mutated	high RT	FAM32A	chr19	16296234	16302857	+	AP1M1	yes
TCGA-B0-4712	mutated	high RT	FAM35BP	chr10	46897640	46939145	+
TCGA-B0-4712	mutated	high RT	FAM3A	chrX	153733326	153744566	-	SLC10A3	yes
TCGA-B0-4712	mutated	high RT	FAM81A	chr15	59730371	59815751	+	GCNT3	no
TCGA-B0-4712	mutated	high RT	FAM84B	chr8	127564682	127570711	-
TCGA-B0-4712	mutated	high RT	FAM91A1	chr8	124780881	124827690	+	FER1L6	no
TCGA-B0-4712	mutated	high RT	FAM98A	chr2	33808728	33824362	-
TCGA-B0-4712	mutated	high RT	FBXL12	chr19	9920942	9929731	-	ZNF846	no
TCGA-B0-4712	mutated	high RT	FBXO32	chr8	124510126	124553493	-
TCGA-B0-4712	mutated	high RT	FCGBP	chr19	40353962	40440533	-	FBL	yes
TCGA-B0-4712	mutated	high RT	FGFBP3	chr10	93666344	93669258	-
TCGA-B0-4712	mutated	high RT	FGFR2	chr10	123237843	123357972	-
TCGA-B0-4712	mutated	high RT	FH	chr1	241660856	241683085	-	RGS7	no
TCGA-B0-4712	mutated	high RT	FKBP8	chr19	18642567	18654383	-	ELL	no
TCGA-B0-4712	mutated	high RT	FLYWCH1	chr16	2961979	3001209	+	KREMEN2	yes
TCGA-B0-4712	mutated	high RT	FNTA	chr8	42911441	42940932	+	SGK196	no
TCGA-B0-4712	mutated	high RT	FRG1	chr4	190861973	190884359	+
TCGA-B0-4712	mutated	high RT	FTSJ1	chrX	48334408	48344752	+	PORCN	no
TCGA-B0-4712	mutated	high RT	FZD6	chr8	104310660	104345094	+	CTHRC1	yes
TCGA-B0-4712	mutated	high RT	GABARAPL1	chr12	10365488	10375724	+	KLRD1	yes
TCGA-B0-4712	mutated	high RT	GABARAPL2	chr16	75600248	75611779	+
TCGA-B0-4712	mutated	high RT	GABRP	chr5	170210722	170241050	+	RANBP17	no
TCGA-B0-4712	mutated	high RT	GALNT14	chr2	31133330	31361592	-	CAPN13	no
TCGA-B0-4712	mutated	high RT	GBAS	chr7	56032269	56067875	+
TCGA-B0-4712	mutated	high RT	GCGR	chr17	79762007	79771889	+
TCGA-B0-4712	mutated	high RT	GEMIN8	chrX	14024844	14048035	-	GPM6B	no
TCGA-B0-4712	mutated	high RT	GGT8P	chr2	91963367	91970153	+	ACTR3BP2
TCGA-B0-4712	mutated	high RT	GLDC	chr9	6532463	6645692	-
TCGA-B0-4712	mutated	high RT	GLTP	chr12	110288747	110318293	-
TCGA-B0-4712	mutated	high RT	GMFB	chr14	54941208	54955744	-	CNIH1
TCGA-B0-4712	mutated	high RT	GNA11	chr19	3094407	3124000	+	GNA15	yes
TCGA-B0-4712	mutated	high RT	GNB1	chr1	1716723	1822556	-	NADK	no
TCGA-B0-4712	mutated	high RT	GOLGA4	chr3	37284681	37408370	+	C3orf35	yes
TCGA-B0-4712	mutated	high RT	GOLGA5	chr14	93260575	93306306	+	CHGA	no
TCGA-B0-4712	mutated	high RT	GOT2	chr16	58741034	58768261	-	SLC38A7	no
TCGA-B0-4712	mutated	high RT	GPAM	chr10	113909621	113943537	-
TCGA-B0-4712	mutated	high RT	GPCPD1	chr20	5525079	5591672	-	LOC101929207
TCGA-B0-4712	mutated	high RT	GPIHBP1	chr8	144295067	144299044	+	ZFP41	no
TCGA-B0-4712	mutated	high RT	GPX7	chr1	53068042	53074723	+	FAM159A	yes
TCGA-B0-4712	mutated	high RT	GRB7	chr17	37894161	37903538	+
TCGA-B0-4712	mutated	high RT	GSPT1	chr16	11961984	12010519	-	RSL1D1	yes
TCGA-B0-4712	mutated	high RT	GTF2IRD2_2	chr7	74210482	74267872	-
TCGA-B0-4712	mutated	high RT	H2AFV	chr7	44866487	44887725	-
TCGA-B0-4712	mutated	high RT	H6PD	chr1	9294862	9331394	+	SPSB1	yes
TCGA-B0-4712	mutated	high RT	HBEGF	chr5	139712427	139726188	-	PFDN1	yes
TCGA-B0-4712	mutated	high RT	HERC2	chr15	28356182	28567298	-	OCA2	yes
TCGA-B0-4712	mutated	high RT	HERC2P7	chr15	23390721	23393943	+
TCGA-B0-4712	mutated	high RT	HHEX	chr10	94449680	94455408	+	EXOC6	no
TCGA-B0-4712	mutated	high RT	HKR1	chr19	37825579	37855357	+	ZNF527	no
TCGA-B0-4712	mutated	high RT	HLA-DMB_1	chr6	32902405	32908847	-
TCGA-B0-4712	mutated	high RT	HLA-DOA_1	chr6	32971959	32977389	-
TCGA-B0-4712	mutated	high RT	HLA-G_1	chr6	29794755	29798899	+	HLA-H_1	yes
TCGA-B0-4712	mutated	high RT	HLF	chr17	53342320	53402426	+
TCGA-B0-4712	mutated	high RT	HMG20B	chr19	3572942	3579081	+	GIPC3	yes
TCGA-B0-4712	mutated	high RT	HMGB3	chrX	150148980	150159248	+	MIR4330
TCGA-B0-4712	mutated	high RT	HMGN1	chr21	40714240	40721047	-
TCGA-B0-4712	mutated	high RT	HOOK1	chr1	60280462	60342050	+
TCGA-B0-4712	mutated	high RT	HSPA8	chr11	122928199	122933186	-
TCGA-B0-4712	mutated	high RT	HSPH1	chr13	31709110	31736525	-
TCGA-B0-4712	mutated	high RT	HYOU1	chr11	118914895	118927957	-	SLC37A4	yes
TCGA-B0-4712	mutated	high RT	IBTK	chr6	82879703	82957471	-	FAM46A	yes
TCGA-B0-4712	mutated	high RT	ICOSLG	chr21	45642877	45660887	-
TCGA-B0-4712	mutated	high RT	ID4	chr6	19837600	19842431	+
TCGA-B0-4712	mutated	high RT	IDNK	chr9	86237963	86259045	+
TCGA-B0-4712	mutated	high RT	IFI6	chr1	27992571	27998724	-	FGR	yes
TCGA-B0-4712	mutated	high RT	IFT88	chr13	21141207	21265576	+	IL17D	no
TCGA-B0-4712	mutated	high RT	IGBP1	chrX	69353317	69386173	+	DGAT2L6	no
TCGA-B0-4712	mutated	high RT	IGFBP5	chr2	217536827	217560272	-
TCGA-B0-4712	mutated	high RT	INO80	chr15	41267987	41408444	-
TCGA-B0-4712	mutated	high RT	INTS10	chr8	19674917	19709586	+	LPL	no
TCGA-B0-4712	mutated	high RT	IPO5	chr13	98605928	98676550	+	FARP1	no
TCGA-B0-4712	mutated	high RT	IQGAP1	chr15	90931472	91045475	+	CRTC3	no
TCGA-B0-4712	mutated	high RT	IRGM	chr5	150226084	150228231	+
TCGA-B0-4712	mutated	high RT	ITGA6	chr2	173292313	173371181	+	PDK1	no
TCGA-B0-4712	mutated	high RT	ITGAV	chr2	187454789	187545629	+	FAM171B	yes
TCGA-B0-4712	mutated	high RT	ITM2C	chr2	231729312	231743969	+	LOC151484
TCGA-B0-4712	mutated	high RT	ITPR2	chr12	26488284	26986131	-
TCGA-B0-4712	mutated	high RT	ITSN2	chr2	24425734	24583397	-
TCGA-B0-4712	mutated	high RT	IVD	chr15	40697685	40713512	+	BAHD1	no
TCGA-B0-4712	mutated	high RT	KCNJ8	chr12	21917888	21927755	-	LDHB	no
TCGA-B0-4712	mutated	high RT	KCTD15	chr19	34287750	34306666	+	LSM14A	no
TCGA-B0-4712	mutated	high RT	KCTD18	chr2	201353683	201374792	-
TCGA-B0-4712	mutated	high RT	KHDRBS1	chr1	32479294	32526460	+	TMEM39B	yes
TCGA-B0-4712	mutated	high RT	KIAA1109	chr4	123091757	123283914	+	ADAD1	no
TCGA-B0-4712	mutated	high RT	KIAA1456	chr8	12803150	12889012	+
TCGA-B0-4712	mutated	high RT	KIAA2013	chr1	11979644	11986485	-	NPPB	no
TCGA-B0-4712	mutated	high RT	KIF3A	chr5	132028318	132073270	-
TCGA-B0-4712	mutated	high RT	KLF15	chr3	126061477	126076236	-
TCGA-B0-4712	mutated	high RT	KLF5	chr13	73629113	73651680	+	LINC00392
TCGA-B0-4712	mutated	high RT	KLHL24	chr3	183353410	183402304	+	YEATS2	yes
TCGA-B0-4712	mutated	high RT	KNG1	chr3	186435097	186462199	+	EIF4A2	no
TCGA-B0-4712	mutated	high RT	L1CAM	chrX	153126968	153151628	-	PDZD4	yes
TCGA-B0-4712	mutated	high RT	LACTB	chr15	63413998	63434264	+
TCGA-B0-4712	mutated	high RT	LAMC1	chr1	182992594	183114727	+	LAMC2	no
TCGA-B0-4712	mutated	high RT	LAMP2	chrX	119560002	119603204	-
TCGA-B0-4712	mutated	high RT	LAP3	chr4	17578926	17609590	+	MED28	no
TCGA-B0-4712	mutated	high RT	LAPTM4A	chr2	20232410	20251789	-	MATN3	no
TCGA-B0-4712	mutated	high RT	LCN2	chr9	130911731	130915734	+	C9orf16	no
TCGA-B0-4712	mutated	high RT	LEMD2	chr6	33738989	33756906	-	IP6K3	no
TCGA-B0-4712	mutated	high RT	LGALS3BP	chr17	76967334	76976061	-	TIMP2	yes
TCGA-B0-4712	mutated	high RT	LGALSL	chr2	64681326	64688517	+	AFTPH	no
TCGA-B0-4712	mutated	high RT	LINC00174	chr7	65841030	65865395	-
TCGA-B0-4712	mutated	high RT	LINC00674	chr17	66097695	66132070	+	LOC440461	no
TCGA-B0-4712	mutated	high RT	LMAN1	chr18	56995055	57026508	-	CPLX4	yes
TCGA-B0-4712	mutated	high RT	LMO3	chr12	16701305	16761148	-
TCGA-B0-4712	mutated	high RT	LOC100505715	chr19	44395955	44405955	-	ZNF404	no
TCGA-B0-4712	mutated	high RT	LOC728743	chr7	150102839	150109558	+	LINC00996
TCGA-B0-4712	mutated	high RT	LOC729737	chr1	134772	140566	-
TCGA-B0-4712	mutated	high RT	LOC730102	chr1	177975274	178007142	-	SEC16B	yes
TCGA-B0-4712	mutated	high RT	LRP5	chr11	68080076	68216743	+	PPP6R3
TCGA-B0-4712	mutated	high RT	LRPPRC	chr2	44113362	44223144	-
TCGA-B0-4712	mutated	high RT	LRRC58	chr3	120043575	120068186	-	GPR156	yes
TCGA-B0-4712	mutated	high RT	LRRK2	chr12	40618812	40763086	+	MUC19
TCGA-B0-4712	mutated	high RT	LSM14A	chr19	34663351	34720420	+	KIAA0355	no
TCGA-B0-4712	mutated	high RT	LYRM9	chr17	26205339	26220409	-	NOS2	yes
TCGA-B0-4712	mutated	high RT	MAEA	chr4	1283638	1333936	+	UVSSA
TCGA-B0-4712	mutated	high RT	MAN2A2	chr15	91446565	91465815	+	UNC45A	no
TCGA-B0-4712	mutated	high RT	MANBAL	chr20	35918050	35945663	+	SRC	no
TCGA-B0-4712	mutated	high RT	MAP1S	chr19	17830302	17845324	+	FCHO1	yes
TCGA-B0-4712	mutated	high RT	MAP2K3	chr17	21187967	21218551	+	KCNJ12	no
TCGA-B0-4712	mutated	high RT	MAP3K1	chr5	56110899	56191978	+	SETD9
TCGA-B0-4712	mutated	high RT	MAP3K7	chr6	91223291	91297020	-
TCGA-B0-4712	mutated	high RT	MAP3K8	chr10	30722949	30750762	+
TCGA-B0-4712	mutated	high RT	MAPK13	chr6	36098260	36112301	+	BRPF3	no
TCGA-B0-4712	mutated	high RT	MARK3	chr14	103851700	103970166	+
TCGA-B0-4712	mutated	high RT	MAT2B	chr5	162930069	162946359	+
TCGA-B0-4712	mutated	high RT	MBIP	chr14	36767763	36789882	-	PTCSC3
TCGA-B0-4712	mutated	high RT	MCCC2	chr5	70883114	70954530	+	CARTPT	no
TCGA-B0-4712	mutated	high RT	MCM3	chr6	52128811	52149679	-	IL17F	no
TCGA-B0-4712	mutated	high RT	MED10	chr5	6372038	6378639	-	FLJ33360	yes
TCGA-B0-4712	mutated	high RT	MFAP3L	chr4	170907747	170947429	-	LOC100506085
TCGA-B0-4712	mutated	high RT	MGAM	chr7	141695678	141806547	+	LOC93432	no
TCGA-B0-4712	mutated	high RT	MGLL	chr3	127407904	127542093	-
TCGA-B0-4712	mutated	high RT	MKNK2	chr19	2037469	2051243	-	BTBD2	yes
TCGA-B0-4712	mutated	high RT	MKRN1	chr7	140152839	140179369	-
TCGA-B0-4712	mutated	high RT	MLF2	chr12	6857157	6862636	-
TCGA-B0-4712	mutated	high RT	MMP7	chr11	102391238	102401478	-	TMEM123	no
TCGA-B0-4712	mutated	high RT	MPC1	chr6	166778407	166796501	-
TCGA-B0-4712	mutated	high RT	MPRIP	chr17	16946073	17095962	+
TCGA-B0-4712	mutated	high RT	MRFAP1L1	chr4	6709428	6711606	-
TCGA-B0-4712	mutated	high RT	MRPL11	chr11	66202545	66206319	-
TCGA-B0-4712	mutated	high RT	MRPL23	chr11	1968501	1977839	+
TCGA-B0-4712	mutated	high RT	MRPL4	chr19	10362639	10370736	+	ICAM1	yes
TCGA-B0-4712	mutated	high RT	MRPS31P5	chr13	52741844	52768602	-	NEK3	no
TCGA-B0-4712	mutated	high RT	MSL3	chrX	11776277	11793872	+	FRMPD4	yes
TCGA-B0-4712	mutated	high RT	MTCH2	chr11	47638857	47664206	-	C1QTNF4	no
TCGA-B0-4712	mutated	high RT	MTFMT	chr15	65293849	65321977	-	SPG21	no
TCGA-B0-4712	mutated	high RT	MUL1	chr1	20825940	20834674	-	CAMK2N1	no
TCGA-B0-4712	mutated	high RT	MYO10	chr5	16662015	16936385	-
TCGA-B0-4712	mutated	high RT	MYOF	chr10	95066185	95242074	-
TCGA-B0-4712	mutated	high RT	NAAA	chr4	76831807	76862166	-	PPEF2	no
TCGA-B0-4712	mutated	high RT	NAPG	chr18	10525872	10552766	+	LOC101927410
TCGA-B0-4712	mutated	high RT	NBAS	chr2	15307031	15701472	-
TCGA-B0-4712	mutated	high RT	NCOA1	chr2	24807345	24993570	+
TCGA-B0-4712	mutated	high RT	NDUFA4	chr7	10971579	10979813	-
TCGA-B0-4712	mutated	high RT	NDUFAF4	chr6	97337186	97345767	-	GPR63	no
TCGA-B0-4712	mutated	high RT	NDUFB4	chr3	120315127	120321258	+
TCGA-B0-4712	mutated	high RT	NEFM	chr8	24771273	24776606	+
TCGA-B0-4712	mutated	high RT	NF2	chr22	29999544	30094589	+	CABP7	yes
TCGA-B0-4712	mutated	high RT	NGDN	chr14	23938897	23947402	+	THTPA	no
TCGA-B0-4712	mutated	high RT	NKAPP1	chrX	119370308	119379122	-
TCGA-B0-4712	mutated	high RT	NLK	chr17	26369687	26523404	+	PYY2	no
TCGA-B0-4712	mutated	high RT	NOB1	chr16	69775756	69788871	-	NQO1	no
TCGA-B0-4712	mutated	high RT	NPNT	chr4	106816596	106892828	+
TCGA-B0-4712	mutated	high RT	NRSN2	chr20	327369	335512	+	TRIB3	yes
TCGA-B0-4712	mutated	high RT	NSFL1C	chr20	1422806	1448337	-	FKBP1A-SDCBP2
TCGA-B0-4712	mutated	high RT	NUCKS1	chr1	205681946	205719372	-	SLC45A3	no
TCGA-B0-4712	mutated	high RT	NUDT12	chr5	102884555	102898502	-	LOC102467212
TCGA-B0-4712	mutated	high RT	NUP205	chr7	135242661	135333499	+	C7orf73
TCGA-B0-4712	mutated	high RT	NUP210	chr3	13357729	13461819	-	IQSEC1	no
TCGA-B0-4712	mutated	high RT	NUPL1	chr13	25875665	25916561	+	ATP8A2	no
TCGA-B0-4712	mutated	high RT	NUPL2	chr7	23221445	23240630	+	GPNMB	yes
TCGA-B0-4712	mutated	high RT	NYNRIN	chr14	24867991	24888494	+
TCGA-B0-4712	mutated	high RT	OCRL	chrX	128674251	128726530	+
TCGA-B0-4712	mutated	high RT	OGDH	chr7	44646120	44748669	+	ZMIZ2	yes
TCGA-B0-4712	mutated	high RT	OSBPL5	chr11	3108345	3187969	-	CARS	yes
TCGA-B0-4712	mutated	high RT	OSTC	chr4	109571740	109588978	+
TCGA-B0-4712	mutated	high RT	PABPC4L	chr4	135117488	135122903	-
TCGA-B0-4712	mutated	high RT	PARP1	chr1	226548391	226595801	-	LIN9	yes
TCGA-B0-4712	mutated	high RT	PATL1	chr11	59404191	59436511	-	OSBP	no
TCGA-B0-4712	mutated	high RT	PCM1	chr8	17780365	17887457	+
TCGA-B0-4712	mutated	high RT	PCMTD2	chr20	62887047	62907579	+	LINC00266-1
TCGA-B0-4712	mutated	high RT	PCNX	chr14	71374121	71582099	+	SNORD56B
TCGA-B0-4712	mutated	high RT	PDCD6IP	chr3	33840062	33911199	+
TCGA-B0-4712	mutated	high RT	PDP2	chr16	66914382	66925002	+
TCGA-B0-4712	mutated	high RT	PEX5	chr12	7341758	7371169	+	ACSM4	no
TCGA-B0-4712	mutated	high RT	PGD	chr1	10459084	10480201	+	APITD1-CORT
TCGA-B0-4712	mutated	high RT	PHB	chr17	47481409	47492267	-
TCGA-B0-4712	mutated	high RT	PHLDA1	chr12	76419226	76425556	-	SNORA70_1	no
TCGA-B0-4712	mutated	high RT	PIGR	chr1	207101866	207119811	-	FAIM3	yes
TCGA-B0-4712	mutated	high RT	PIK3C2A	chr11	17108123	17191354	-	RPS13	yes
TCGA-B0-4712	mutated	high RT	PIK3C2B	chr1	204391757	204459474	-	PPP1R15B	no
TCGA-B0-4712	mutated	high RT	PIK3C2G	chr12	18414473	18801352	+
TCGA-B0-4712	mutated	high RT	PIP5K1A	chr1	151171020	151222007	+	PSMD4	yes
TCGA-B0-4712	mutated	high RT	PLD2	chr17	4710395	4726727	+	MINK1	no
TCGA-B0-4712	mutated	high RT	PLD6	chr17	17104308	17109646	-
TCGA-B0-4712	mutated	high RT	PLEKHA5	chr12	19282625	19529333	+	AEBP2	no
TCGA-B0-4712	mutated	high RT	PLEKHB2	chr2	131862419	131907425	+	POTEE	yes
TCGA-B0-4712	mutated	high RT	PM20D2	chr6	89855768	89875288	+
TCGA-B0-4712	mutated	high RT	PMAIP1	chr18	57567191	57571538	+
TCGA-B0-4712	mutated	high RT	PNMAL1	chr19	46969747	46974820	-	CCDC8	no
TCGA-B0-4712	mutated	high RT	POLI	chr18	51795848	51824604	+
TCGA-B0-4712	mutated	high RT	POP4	chr19	30097169	30108162	+	PLEKHF1	yes
TCGA-B0-4712	mutated	high RT	POU6F1	chr12	51580718	51611477	-	TFCP2	no
TCGA-B0-4712	mutated	high RT	PPARGC1A	chr4	23793643	23891700	-	MIR548AJ2
TCGA-B0-4712	mutated	high RT	PPM1K	chr4	89178760	89205983	-	ABCG2	yes
TCGA-B0-4712	mutated	high RT	PPP1CB	chr2	28974613	29025806	+	SPDYA	yes
TCGA-B0-4712	mutated	high RT	PPP1R3F	chrX	49126305	49144555	+	GAGE10	no
TCGA-B0-4712	mutated	high RT	PPP6R3	chr11	68228185	68382801	+	GAL	no
TCGA-B0-4712	mutated	high RT	PRKAB2	chr1	146626684	146644168	-	NBPF13P
TCGA-B0-4712	mutated	high RT	PROX1	chr1	214161277	214214847	+	SMYD2	yes
TCGA-B0-4712	mutated	high RT	PRPF19	chr11	60658019	60674061	-
TCGA-B0-4712	mutated	high RT	PRPF3	chr1	150293927	150325704	+	RPRD2	no
TCGA-B0-4712	mutated	high RT	PRR14	chr16	30662240	30667734	+	FBRS	no
TCGA-B0-4712	mutated	high RT	PRRC2C	chr1	171454665	171562650	+
TCGA-B0-4712	mutated	high RT	PRSS22	chr16	2902727	2908171	-	PRSS30P	no
TCGA-B0-4712	mutated	high RT	PSMB5	chr14	23495059	23504429	-	C14orf93	no
TCGA-B0-4712	mutated	high RT	PSMB6	chr17	4699438	4701798	+	PLD2	no
TCGA-B0-4712	mutated	high RT	PSMD2	chr3	184016885	184026842	+	EIF4G1	no
TCGA-B0-4712	mutated	high RT	PSMD4	chr1	151227196	151239954	+	ZNF687	no
TCGA-B0-4712	mutated	high RT	PTAR1	chr9	72324437	72374876	-	APBA1	no
TCGA-B0-4712	mutated	high RT	PTGER4	chr5	40680031	40693837	+
TCGA-B0-4712	mutated	high RT	PTGES3	chr12	57057124	57082192	-	ATP5B	no
TCGA-B0-4712	mutated	high RT	PTGS2	chr1	186640943	186649559	-	MIR548F1
TCGA-B0-4712	mutated	high RT	PTP4A2	chr1	32372021	32403988	-	SPOCD1	yes
TCGA-B0-4712	mutated	high RT	PTPN13	chr4	87515467	87736328	+
TCGA-B0-4712	mutated	high RT	PTPN18	chr2	131113579	131132982	+
TCGA-B0-4712	mutated	high RT	PTPN3	chr9	112137973	112260593	-	EPB41L4B	no
TCGA-B0-4712	mutated	high RT	PTPRF	chr1	43996546	44089343	+	KDM4A	no
TCGA-B0-4712	mutated	high RT	PTPRJ	chr11	48002109	48192394	+	OR4B1	no
TCGA-B0-4712	mutated	high RT	PTTG1IP	chr21	46269499	46293818	-	SUMO3	no
TCGA-B0-4712	mutated	high RT	PWWP2B	chr10	134210701	134231358	+	C10orf91	no
TCGA-B0-4712	mutated	high RT	RALGAPA2	chr20	20370271	20693266	-
TCGA-B0-4712	mutated	high RT	RAN	chr12	131356538	131362223	+	GPR133	yes
TCGA-B0-4712	mutated	high RT	RARS	chr5	167913462	167946309	+	FBLL1	yes
TCGA-B0-4712	mutated	high RT	RASEF	chr9	85594499	85678043	-
TCGA-B0-4712	mutated	high RT	RB1CC1	chr8	53535017	53627026	-	FAM150A	yes
TCGA-B0-4712	mutated	high RT	RBBP6	chr16	24550907	24584183	+
TCGA-B0-4712	mutated	high RT	RBM11	chr21	15588465	15600693	+	ABCC13	yes
TCGA-B0-4712	mutated	high RT	RBM17	chr10	6130948	6159422	+	PFKFB3	no
TCGA-B0-4712	mutated	high RT	RCBTB2	chr13	49063098	49110118	-
TCGA-B0-4712	mutated	high RT	RCC2	chr1	17733250	17766250	-
TCGA-B0-4712	mutated	high RT	RCN2	chr15	77223961	77242601	+	PSTPIP1	yes
TCGA-B0-4712	mutated	high RT	REST	chr4	57774041	57802010	+
TCGA-B0-4712	mutated	high RT	RGS16	chr1	182567757	182573548	-	RNASEL	no
TCGA-B0-4712	mutated	high RT	RGS2	chr1	192778168	192781407	+
TCGA-B0-4712	mutated	high RT	RGS3	chr9	116207008	116360023	+	ZNF618	no
TCGA-B0-4712	mutated	high RT	RHBDD2	chr7	75508316	75518244	+	POR	no
TCGA-B0-4712	mutated	high RT	RHOBTB3	chr5	95053336	95132071	+
TCGA-B0-4712	mutated	high RT	RHOV	chr15	41164411	41166487	-
TCGA-B0-4712	mutated	high RT	RIOK2	chr5	96496570	96519005	-	LIX1	no
TCGA-B0-4712	mutated	high RT	RIOK3	chr18	21032786	21063099	+	C18orf8	yes
TCGA-B0-4712	mutated	high RT	RNASEL	chr1	182542768	182558394	-
TCGA-B0-4712	mutated	high RT	RNF114	chr20	48552913	48570422	+	SNAI1	yes
TCGA-B0-4712	mutated	high RT	RNF44	chr5	175953699	175964421	-
TCGA-B0-4712	mutated	high RT	RNF6	chr13	26786904	26796508	-	SHISA2	no
TCGA-B0-4712	mutated	high RT	RP9	chr7	33134409	33149002	-	NT5C3A
TCGA-B0-4712	mutated	high RT	RPGR	chrX	38128422	38186788	-	SRPX	yes
TCGA-B0-4712	mutated	high RT	RPS9	chr19	54704725	54711515	+
TCGA-B0-4712	mutated	high RT	RRP12	chr10	99116457	99161127	-	FRAT2	no
TCGA-B0-4712	mutated	high RT	RSL1D1	chr16	11928054	11945442	-	BCAR4	no
TCGA-B0-4712	mutated	high RT	RSL24D1	chr15	55473511	55489231	-
TCGA-B0-4712	mutated	high RT	SAMD9L	chr7	92759367	92777680	-	SAMD9	yes
TCGA-B0-4712	mutated	high RT	SAR1B	chr5	133936838	133968533	-
TCGA-B0-4712	mutated	high RT	SBNO1	chr12	123773655	123834988	-	CDK2AP1	yes
TCGA-B0-4712	mutated	high RT	SCAF11	chr12	46312913	46384401	-
TCGA-B0-4712	mutated	high RT	SCN2A	chr2	166095911	166248820	+	CSRNP3	no
TCGA-B0-4712	mutated	high RT	SCNN1B	chr16	23313590	23392620	+
TCGA-B0-4712	mutated	high RT	SDC1	chr2	20400557	20425194	-	LAPTM4A	no
TCGA-B0-4712	mutated	high RT	SDPR	chr2	192699031	192712006	-
TCGA-B0-4712	mutated	high RT	SDSL	chr12	113860215	113876081	+
TCGA-B0-4712	mutated	high RT	SEC23IP	chr10	121652084	121704170	+	MIR4682
TCGA-B0-4712	mutated	high RT	SEC63	chr6	108188959	108279482	-	SCML4	yes
TCGA-B0-4712	mutated	high RT	SEL1L	chr14	81937890	82000205	-	LOC100506700
TCGA-B0-4712	mutated	high RT	SELENBP1	chr1	151336777	151345210	-	RFX5	no
TCGA-B0-4712	mutated	high RT	SEMA3G	chr3	52467267	52479043	-
TCGA-B0-4712	mutated	high RT	SEPW1	chr19	48281841	48287943	+
TCGA-B0-4712	mutated	high RT	SERPINA5	chr14	95047705	95059457	+	SERPINA3	yes
TCGA-B0-4712	mutated	high RT	SERPINB6	chr6	2948392	2972399	-	SERPINB9	yes
TCGA-B0-4712	mutated	high RT	SET	chr9	131445933	131458675	+	PKN3	no
TCGA-B0-4712	mutated	high RT	SETX	chr9	135136826	135230372	-
TCGA-B0-4712	mutated	high RT	SGPP1	chr14	64150934	64194756	-	WDR89	no
TCGA-B0-4712	mutated	high RT	SH3GLB1	chr1	87170252	87213867	+
TCGA-B0-4712	mutated	high RT	SHH	chr7	155592735	155604967	-
TCGA-B0-4712	mutated	high RT	SIGMAR1	chr9	34634718	34637823	-	ARID3C	yes
TCGA-B0-4712	mutated	high RT	SIKE1	chr1	115312104	115323308	-	CSDE1	no
TCGA-B0-4712	mutated	high RT	SIX4	chr14	61176255	61191039	-	SIX1	yes
TCGA-B0-4712	mutated	high RT	SLC17A5	chr6	74303101	74363737	-	EEF1A1	yes
TCGA-B0-4712	mutated	high RT	SLC18B1	chr6	133090506	133119747	-	VNN2	yes
TCGA-B0-4712	mutated	high RT	SLC25A38	chr3	39424814	39438819	+	RPSA	yes
TCGA-B0-4712	mutated	high RT	SLC25A4	chr4	186064416	186071538	+
TCGA-B0-4712	mutated	high RT	SLC34A2	chr4	25657434	25680368	+
TCGA-B0-4712	mutated	high RT	SLC35C1	chr11	45825622	45834567	+	CRY2	no
TCGA-B0-4712	mutated	high RT	SLC38A5	chrX	48316919	48328644	-	SSX4B_2
TCGA-B0-4712	mutated	high RT	SLC44A2	chr19	10713120	10755235	+
TCGA-B0-4712	mutated	high RT	SLC46A3	chr13	29274217	29293150	-
TCGA-B0-4712	mutated	high RT	SLC4A1	chr17	42325757	42345502	-	UBTF	no
TCGA-B0-4712	mutated	high RT	SLC4A3	chr2	220492291	220506702	+
TCGA-B0-4712	mutated	high RT	SLC9A8	chr20	48429249	48508779	+
TCGA-B0-4712	mutated	high RT	SLITRK4	chrX	142710594	142723926	-	SPANXN3	yes
TCGA-B0-4712	mutated	high RT	SLTM	chr15	59171243	59225852	-
TCGA-B0-4712	mutated	high RT	SMAD3	chr15	67358194	67487533	+
TCGA-B0-4712	mutated	high RT	SMARCA2	chr9	2015218	2193623	+
TCGA-B0-4712	mutated	high RT	SMEK1	chr14	91923824	91976824	-	CCDC88C	no
TCGA-B0-4712	mutated	high RT	SNX4	chr3	125165487	125239058	-	ZNF148	no
TCGA-B0-4712	mutated	high RT	SP100	chr2	231280870	231410317	+
TCGA-B0-4712	mutated	high RT	SPATA7	chr14	88851987	88904804	+
TCGA-B0-4712	mutated	high RT	SPATS2L	chr2	201170603	201346986	+
TCGA-B0-4712	mutated	high RT	SPOCK2	chr10	73818791	73848790	-
TCGA-B0-4712	mutated	high RT	SPR	chr2	73114511	73119289	+	EMX1	no
TCGA-B0-4712	mutated	high RT	SPRY2	chr13	80910111	80915086	-
TCGA-B0-4712	mutated	high RT	SPTLC2	chr14	77972339	78083110	-	ISM2	no
TCGA-B0-4712	mutated	high RT	SREK1	chr5	65440045	65479444	+
TCGA-B0-4712	mutated	high RT	SRM	chr1	11114648	11120091	-	MASP2	no
TCGA-B0-4712	mutated	high RT	SRP9	chr1	225965514	225978168	+	EPHX1	no
TCGA-B0-4712	mutated	high RT	SRRM1	chr1	24969593	24999772	+	CLIC4	yes
TCGA-B0-4712	mutated	high RT	SRSF4	chr1	29474249	29508637	-	TMEM200B	yes
TCGA-B0-4712	mutated	high RT	SSFA2	chr2	182756442	182795464	+	PPP1R1C	no
TCGA-B0-4712	mutated	high RT	SSTR1	chr14	38677203	38682268	+
TCGA-B0-4712	mutated	high RT	ST6GAL1	chr3	186648314	186796341	+
TCGA-B0-4712	mutated	high RT	STAG2	chrX	123094409	123236505	+	SH2D1A	yes
TCGA-B0-4712	mutated	high RT	STAM2	chr2	152973314	153032506	-	CACNB4	no
TCGA-B0-4712	mutated	high RT	STAMBP	chr2	74056042	74094295	+	ACTG2	yes
TCGA-B0-4712	mutated	high RT	STC1	chr8	23699433	23712320	-	NKX2-6	yes
TCGA-B0-4712	mutated	high RT	STK11IP	chr2	220462595	220481173	+	SLC4A3	no
TCGA-B0-4712	mutated	high RT	SUB1	chr5	32585604	32604185	+	NPR3	no
TCGA-B0-4712	mutated	high RT	SUCLG1	chr2	84650646	84686586	-
TCGA-B0-4712	mutated	high RT	SUV420H1	chr11	67922329	67981239	-	CHKA	no
TCGA-B0-4712	mutated	high RT	TACC1	chr8	38585703	38710546	+	PLEKHA2	no
TCGA-B0-4712	mutated	high RT	TAF15	chr17	34136458	34174246	+
TCGA-B0-4712	mutated	high RT	TARBP1	chr1	234527058	234614849	-
TCGA-B0-4712	mutated	high RT	TBC1D13	chr9	131549485	131572711	+	ENDOG	no
TCGA-B0-4712	mutated	high RT	TBKBP1	chr17	45772629	45789429	+	TBX21	yes
TCGA-B0-4712	mutated	high RT	TBX3	chr12	115108058	115121969	-
TCGA-B0-4712	mutated	high RT	TCAIM	chr3	44379610	44450940	+
TCGA-B0-4712	mutated	high RT	TCEAL1	chrX	102883647	102885876	+
TCGA-B0-4712	mutated	high RT	TCEAL2	chrX	101380659	101382684	+
TCGA-B0-4712	mutated	high RT	TCEAL7	chrX	102585113	102587251	+	WBP5	no
TCGA-B0-4712	mutated	high RT	TEF	chr22	41763336	41795332	+
TCGA-B0-4712	mutated	high RT	TEP1	chr14	20833825	20881579	-
TCGA-B0-4712	mutated	high RT	TFAP2C	chr20	55204357	55214338	+
TCGA-B0-4712	mutated	high RT	TFCP2L1	chr2	121974163	122042778	-
TCGA-B0-4712	mutated	high RT	TFDP1	chr13	114239002	114295788	+
TCGA-B0-4712	mutated	high RT	TFE3	chrX	48886237	48901043	-	GRIPAP1	no
TCGA-B0-4712	mutated	high RT	TFRC	chr3	195776154	195809032	-	SDHAP1	yes
TCGA-B0-4712	mutated	high RT	THUMPD1	chr16	20744985	20753199	-	ACSM1	no
TCGA-B0-4712	mutated	high RT	TIMM17A	chr1	201924618	201939789	+	RNPEP	yes
TCGA-B0-4712	mutated	high RT	TLK2	chr17	60536018	60692841	+	MRC2	yes
TCGA-B0-4712	mutated	high RT	TMEM128	chr4	4237268	4249969	-	OTOP1	no
TCGA-B0-4712	mutated	high RT	TMEM14C	chr6	10723147	10731362	+	TMEM14B	no
TCGA-B0-4712	mutated	high RT	TMEM2	chr9	74298281	74383800	-	TRPM3	no
TCGA-B0-4712	mutated	high RT	TMEM201	chr1	9648931	9674935	+	PIK3CD	yes
TCGA-B0-4712	mutated	high RT	TMEM5	chr12	64173582	64203338	+	SRGAP1	no
TCGA-B0-4712	mutated	high RT	TMEM61	chr1	55446464	55457966	+	BSND	no
TCGA-B0-4712	mutated	high RT	TMEM67	chr8	94767071	94831460	+
TCGA-B0-4712	mutated	high RT	TMEM87B	chr2	112812799	112876895	+	FBLN7	yes
TCGA-B0-4712	mutated	high RT	TMPRSS3	chr21	43791995	43816955	-	TFF1	no
TCGA-B0-4712	mutated	high RT	TMTC4	chr13	101256089	101327189	-	GGACT
TCGA-B0-4712	mutated	high RT	TNFRSF11B	chr8	119935795	119964383	-
TCGA-B0-4712	mutated	high RT	TNRC6A	chr16	24741048	24837547	+	SLC5A11	no
TCGA-B0-4712	mutated	high RT	TPM4	chr19	16178316	16213813	+	RAB8A	no
TCGA-B0-4712	mutated	high RT	TRA2A	chr7	23544400	23571660	-
TCGA-B0-4712	mutated	high RT	TRIL	chr7	28992973	28998029	-
TCGA-B0-4712	mutated	high RT	TRIM16	chr17	15531279	15586193	-	CDRT1	yes
TCGA-B0-4712	mutated	high RT	TRIM26_1	chr6	30152231	30181271	-
TCGA-B0-4712	mutated	high RT	TRIM66	chr11	8633583	8680383	-	STK33	no
TCGA-B0-4712	mutated	high RT	TRPM7	chr15	50849351	50979012	-	USP50	no
TCGA-B0-4712	mutated	high RT	TSEN15	chr1	184020784	184043344	+	C1orf21	yes
TCGA-B0-4712	mutated	high RT	TSN	chr2	122513120	122525428	+	CNTNAP5	no
TCGA-B0-4712	mutated	high RT	TSPAN12	chr7	120427373	120498177	-
TCGA-B0-4712	mutated	high RT	TTC1	chr5	159436106	159492552	+
TCGA-B0-4712	mutated	high RT	TTC8	chr14	89290496	89344340	+	TRNA_Ala_5
TCGA-B0-4712	mutated	high RT	TUBB8	chr10	92827	95178	-
TCGA-B0-4712	mutated	high RT	TUBGCP5	chr15	22833394	22873891	+	CYFIP1	no
TCGA-B0-4712	mutated	high RT	TYK2	chr19	10461203	10491248	-	ICAM3	yes
TCGA-B0-4712	mutated	high RT	U2AF1	chr21	44513065	44527688	-	CBS	no
TCGA-B0-4712	mutated	high RT	UBE2I	chr16	1359153	1377019	+	BAIAP3	no
TCGA-B0-4712	mutated	high RT	UBE2J2	chr1	1189291	1209234	-	FAM132A	yes
TCGA-B0-4712	mutated	high RT	UBE4B	chr1	10093040	10241296	+	KIF1B	no
TCGA-B0-4712	mutated	high RT	UBL5	chr19	9938555	9940797	+	PIN1	no
TCGA-B0-4712	mutated	high RT	UBR1	chr15	43235097	43398286	-	TTBK2	no
TCGA-B0-4712	mutated	high RT	UFM1	chr13	38923907	38937144	+	LINC00366
TCGA-B0-4712	mutated	high RT	UMPS	chr3	124449212	124468119	+
TCGA-B0-4712	mutated	high RT	UNCX	chr7	1272653	1276613	+
TCGA-B0-4712	mutated	high RT	UPF3A	chr13	115047058	115071291	+	CHAMP1
TCGA-B0-4712	mutated	high RT	USP10	chr16	84733554	84813527	+	CRISPLD2	yes
TCGA-B0-4712	mutated	high RT	UTP11L	chr1	38478383	38490497	+
TCGA-B0-4712	mutated	high RT	UTP23	chr8	117778741	117786921	+
TCGA-B0-4712	mutated	high RT	VAPA	chr18	9913954	9960018	+
TCGA-B0-4712	mutated	high RT	VDAC3	chr8	42249278	42263455	+
TCGA-B0-4712	mutated	high RT	VHL	chr3	10183318	10195354	+	IRAK2	no
TCGA-B0-4712	mutated	high RT	VPS37D	chr7	73082173	73086440	+
TCGA-B0-4712	mutated	high RT	VWA1	chr1	1370902	1378262	+	ATAD3C	no
TCGA-B0-4712	mutated	high RT	WDR45B	chr17	80572437	80606411	-
TCGA-B0-4712	mutated	high RT	WFDC2	chr20	44098393	44110172	+
TCGA-B0-4712	mutated	high RT	WIPI2	chr7	5229834	5273486	+	SLC29A4	no
TCGA-B0-4712	mutated	high RT	WNT11	chr11	75897369	75921803	-
TCGA-B0-4712	mutated	high RT	WRNIP1	chr6	2765665	2785979	+
TCGA-B0-4712	mutated	high RT	XPNPEP1	chr10	111624523	111683311	-
TCGA-B0-4712	mutated	high RT	YPEL5	chr2	30369749	30383399	+	LBH	yes
TCGA-B0-4712	mutated	high RT	YTHDC1_1	chr4	69176104	69215824	-	TMPRSS11B	no
TCGA-B0-4712	mutated	high RT	YTHDC2	chr5	112849390	112930984	+	KCNN2	yes
TCGA-B0-4712	mutated	high RT	YTHDF1	chr20	61826781	61847538	-
TCGA-B0-4712	mutated	high RT	ZC3H6	chr2	113033177	113097640	+
TCGA-B0-4712	mutated	high RT	ZC3H7A	chr16	11844441	11891114	-	TXNDC11	yes
TCGA-B0-4712	mutated	high RT	ZC3H7B	chr22	41697506	41756151	+	TEF	no
TCGA-B0-4712	mutated	high RT	ZC3HAV1	chr7	138728265	138794465	-	ZC3HAV1L	yes
TCGA-B0-4712	mutated	high RT	ZC3HC1	chr7	129658125	129691291	-	UBE2H	no
TCGA-B0-4712	mutated	high RT	ZCCHC6	chr9	88902647	88969402	-	ISCA1	no
TCGA-B0-4712	mutated	high RT	ZDHHC8P1	chr22	23732791	23744799	-	CES5AP1
TCGA-B0-4712	mutated	high RT	ZFP69	chr1	40943301	40962015	+	EXO5
TCGA-B0-4712	mutated	high RT	ZFR	chr5	32354455	32444844	-	MTMR12	no
TCGA-B0-4712	mutated	high RT	ZFYVE27	chr10	99496877	99520664	+
TCGA-B0-4712	mutated	high RT	ZMPSTE24	chr1	40723721	40759856	+
TCGA-B0-4712	mutated	high RT	ZNF12	chr7	6728063	6746566	-
TCGA-B0-4712	mutated	high RT	ZNF133	chr20	18268926	18297640	+	LINC00851
TCGA-B0-4712	mutated	high RT	ZNF137P	chr19	53099936	53103405	+
TCGA-B0-4712	mutated	high RT	ZNF18	chr17	11880761	11900689	-
TCGA-B0-4712	mutated	high RT	ZNF185	chrX	152082985	152142025	+
TCGA-B0-4712	mutated	high RT	ZNF200	chr16	3272324	3285457	-
TCGA-B0-4712	mutated	high RT	ZNF24	chr18	32912177	32924426	-
TCGA-B0-4712	mutated	high RT	ZNF254	chr19	24216206	24312769	+
TCGA-B0-4712	mutated	high RT	ZNF260	chr19	37001588	37019248	-
TCGA-B0-4712	mutated	high RT	ZNF264	chr19	57702867	57734214	+	AURKC	no
TCGA-B0-4712	mutated	high RT	ZNF266	chr19	9523101	9546254	-
TCGA-B0-4712	mutated	high RT	ZNF282	chr7	148892576	148923339	+	ZNF212	no
TCGA-B0-4712	mutated	high RT	ZNF286A	chr17	15602890	15624100	+	TBC1D26	no
TCGA-B0-4712	mutated	high RT	ZNF330	chr4	142142040	142155850	+
TCGA-B0-4712	mutated	high RT	ZNF331	chr19	54024176	54083523	+
TCGA-B0-4712	mutated	high RT	ZNF362	chr1	33722173	33766320	+
TCGA-B0-4712	mutated	high RT	ZNF418	chr19	58433251	58446740	-	ZNF417	no
TCGA-B0-4712	mutated	high RT	ZNF43	chr19	21987750	22034870	-	ZNF100	no
TCGA-B0-4712	mutated	high RT	ZNF444	chr19	56652534	56672262	+	GALP	no
TCGA-B0-4712	mutated	high RT	ZNF518B	chr4	10441503	10459032	-	WDR1	no
TCGA-B0-4712	mutated	high RT	ZNF599	chr19	35248978	35264134	-
TCGA-B0-4712	mutated	high RT	ZNF655	chr7	99156044	99174076	+	GS1-259H13.2
TCGA-B0-4712	mutated	high RT	ZNF671	chr19	58231118	58238995	-	ZNF154	no
TCGA-B0-4712	mutated	high RT	ZNF682	chr19	20115226	20150277	-
TCGA-B0-4712	mutated	high RT	ZNF684	chr1	40997232	41013841	+
TCGA-B0-4712	mutated	high RT	ZNF696	chr8	144373558	144382120	+
TCGA-B0-4712	mutated	high RT	ZNF738	chr19	21541734	21571384	+	ZNF493	no
TCGA-B0-4712	mutated	high RT	ZNF746	chr7	149169883	149194898	-	ZNF777	no
TCGA-B0-4712	mutated	high RT	ZNF776	chr19	58258163	58269527	+	ZNF586	no
TCGA-B0-4712	mutated	high RT	ZSCAN9	chr6	28193028	28201264	+
TCGA-CW-6090	wild-type	low RT	ACTB	chr7	5566778	5570232	-	FBXL18	no
TCGA-CW-6090	wild-type	low RT	ADCY9	chr16	4012649	4166186	-	LOC102724927
TCGA-CW-6090	wild-type	low RT	ALPK2	chr18	56148481	56296189	-
TCGA-CW-6090	wild-type	low RT	APOL6	chr22	36044423	36064456	+	APOL5	yes
TCGA-CW-6090	wild-type	low RT	AQP3	chr9	33441151	33447631	-	AQP7	no
TCGA-CW-6090	wild-type	low RT	ARF4	chr3	57557089	57583215	-
TCGA-CW-6090	wild-type	low RT	ARFGAP3	chr22	43192531	43253408	-	CS330190
TCGA-CW-6090	wild-type	low RT	ARID1A	chr1	27022521	27108601	+	PIGV	no
TCGA-CW-6090	wild-type	low RT	ARMCX2	chrX	100910267	100914876	-
TCGA-CW-6090	wild-type	low RT	ASCC2	chr22	30184596	30234293	-
TCGA-CW-6090	wild-type	low RT	ATP5G1	chr17	46970147	46973232	+	UBE2Z	yes
TCGA-CW-6090	wild-type	low RT	ATP6V1H	chr8	54628102	54755871	-	OPRK1	no
TCGA-CW-6090	wild-type	low RT	ATP8A1	chr4	42410391	42659122	-
TCGA-CW-6090	wild-type	low RT	BAG3	chr10	121410881	121437329	+	INPP5F	no
TCGA-CW-6090	wild-type	low RT	BCL2L1	chr20	30252260	30310656	-
TCGA-CW-6090	wild-type	low RT	BCL7A	chr12	122459860	122499950	+	MLXIP	no
TCGA-CW-6090	wild-type	low RT	BLOC1S6	chr15	45879416	45901909	+	SQRDL	yes
TCGA-CW-6090	wild-type	low RT	BMPR2	chr2	203241049	203432474	+	FAM117B	no
TCGA-CW-6090	wild-type	low RT	BRK1	chr3	10157332	10168874	+	VHL	no
TCGA-CW-6090	wild-type	low RT	BTBD3	chr20	11871370	11907243	+
TCGA-CW-6090	wild-type	low RT	C15orf39	chr15	75491232	75504510	+	GOLGA6C	no
TCGA-CW-6090	wild-type	low RT	C5orf27	chr5	95187935	95195836	+
TCGA-CW-6090	wild-type	low RT	CARD6	chr5	40841409	40855456	+	C7	no
TCGA-CW-6090	wild-type	low RT	CASP4	chr11	104813593	104839325	-	LOC643733
TCGA-CW-6090	wild-type	low RT	CCDC132	chr7	92861652	92990435	+
TCGA-CW-6090	wild-type	low RT	CD2AP	chr6	47445524	47594996	+	GPR111	no
TCGA-CW-6090	wild-type	low RT	CD46	chr1	207925382	207968861	+
TCGA-CW-6090	wild-type	low RT	CDC27	chr17	45195062	45266678	-	ARL17
TCGA-CW-6090	wild-type	low RT	CDV3	chr3	133292433	133309118	+
TCGA-CW-6090	wild-type	low RT	CECR1	chr22	17659679	17702744	-
TCGA-CW-6090	wild-type	low RT	CENPV	chr17	16245847	16256812	-
TCGA-CW-6090	wild-type	low RT	CLK1	chr2	201717731	201729467	-
TCGA-CW-6090	wild-type	low RT	CNEP1R1	chr16	50059116	50070999	+	HEATR3	no
TCGA-CW-6090	wild-type	low RT	CNOT8	chr5	154237808	154256352	+
TCGA-CW-6090	wild-type	low RT	CPXM2	chr10	125505151	125651500	-
TCGA-CW-6090	wild-type	low RT	CSGALNACT2	chr10	43633892	43680754	+
TCGA-CW-6090	wild-type	low RT	CUL2	chr10	35297478	35379570	-
TCGA-CW-6090	wild-type	low RT	DBT	chr1	100652477	100715409	-	LRRC39	yes
TCGA-CW-6090	wild-type	low RT	DDX3X	chrX	41192650	41209524	+	NYX	no
TCGA-CW-6090	wild-type	low RT	DEPDC7	chr11	33037409	33055128	+	TCP11L1	yes
TCGA-CW-6090	wild-type	low RT	DHX34	chr19	47852537	47885961	+
TCGA-CW-6090	wild-type	low RT	DNMT1	chr19	10244021	10305755	-	EIF3G	yes
TCGA-CW-6090	wild-type	low RT	DYSF	chr2	71680752	71913893	+
TCGA-CW-6090	wild-type	low RT	EBAG9	chr8	110551928	110578225	+
TCGA-CW-6090	wild-type	low RT	EFNB2	chr13	107142078	107187388	-
TCGA-CW-6090	wild-type	low RT	EFR3A	chr8	132916355	133025886	+
TCGA-CW-6090	wild-type	low RT	ELK4	chr1	205577070	205602000	-
TCGA-CW-6090	wild-type	low RT	ELMOD2	chr4	141445311	141474924	+
TCGA-CW-6090	wild-type	low RT	EVA1C	chr21	33784744	33887710	+
TCGA-CW-6090	wild-type	low RT	FBXO46	chr19	46213886	46234151	-
TCGA-CW-6090	wild-type	low RT	FXN	chr9	71650478	71715094	+	TJP2	no
TCGA-CW-6090	wild-type	low RT	GIMAP6	chr7	150322463	150329736	-
TCGA-CW-6090	wild-type	low RT	GLRX	chr5	95149552	95158577	-
TCGA-CW-6090	wild-type	low RT	GNS	chr12	65107221	65153226	-
TCGA-CW-6090	wild-type	low RT	HBEGF	chr5	139712427	139726188	-	PFDN1	yes
TCGA-CW-6090	wild-type	low RT	HES1	chr3	193853930	193856401	+
TCGA-CW-6090	wild-type	low RT	HOOK1	chr1	60280462	60342050	+
TCGA-CW-6090	wild-type	low RT	HRNR	chr1	152184551	152196672	-	RPTN	yes
TCGA-CW-6090	wild-type	low RT	HSPA8	chr11	122928199	122933186	-
TCGA-CW-6090	wild-type	low RT	IFI6	chr1	27992571	27998724	-	FGR	yes
TCGA-CW-6090	wild-type	low RT	IFT81	chr12	110562139	110656600	+	ATP2A2	no
TCGA-CW-6090	wild-type	low RT	IRS2	chr13	110406183	110438914	-
TCGA-CW-6090	wild-type	low RT	ITGA6	chr2	173292313	173371181	+	PDK1	yes
TCGA-CW-6090	wild-type	low RT	ITSN2	chr2	24425734	24583397	-
TCGA-CW-6090	wild-type	low RT	IVD	chr15	40697685	40713512	+	BAHD1	no
TCGA-CW-6090	wild-type	low RT	KAT6A	chr8	41786996	41909505	-	ANK1	yes
TCGA-CW-6090	wild-type	low RT	KDM4B	chr19	4969123	5153608	+
TCGA-CW-6090	wild-type	low RT	KHDRBS1	chr1	32479294	32526460	+	TMEM39B	yes
TCGA-CW-6090	wild-type	low RT	KLF6	chr10	3818187	3827473	-	PITRM1	no
TCGA-CW-6090	wild-type	low RT	LAMA1	chr18	6941742	7117813	-	LINC00668
TCGA-CW-6090	wild-type	low RT	LAP3	chr4	17578926	17609590	+	MED28	no
TCGA-CW-6090	wild-type	low RT	LINC00173	chr12	116971226	116974318	+	MAP1LC3B2	no
TCGA-CW-6090	wild-type	low RT	LINC00323	chr21	42513426	42519991	-	DSCAM	yes
TCGA-CW-6090	wild-type	low RT	LRRC27	chr10	134145613	134195010	+	PWWP2B	no
TCGA-CW-6090	wild-type	low RT	LRRK2	chr12	40618812	40763086	+	MUC19
TCGA-CW-6090	wild-type	low RT	LSM4	chr19	18417039	18434001	-
TCGA-CW-6090	wild-type	low RT	MAEA	chr4	1283638	1333936	+	UVSSA
TCGA-CW-6090	wild-type	low RT	MAOB	chrX	43625856	43741721	-
TCGA-CW-6090	wild-type	low RT	MAP3K8	chr10	30722949	30750762	+
TCGA-CW-6090	wild-type	low RT	MAPK13	chr6	36098260	36112301	+	BRPF3	no
TCGA-CW-6090	wild-type	low RT	MGLL	chr3	127407904	127542093	-
TCGA-CW-6090	wild-type	low RT	MICALL2	chr7	1473994	1499109	-
TCGA-CW-6090	wild-type	low RT	MPRIP	chr17	16946073	17095962	+
TCGA-CW-6090	wild-type	low RT	MR1	chr1	181002560	181031074	+	IER5	yes
TCGA-CW-6090	wild-type	low RT	MSL3P1	chr2	234774089	234777055	-	HJURP	yes
TCGA-CW-6090	wild-type	low RT	NAB1	chr2	191513847	191557492	+	GLS	no
TCGA-CW-6090	wild-type	low RT	NACA	chr12	57106210	57119326	-	PTGES3	yes
TCGA-CW-6090	wild-type	low RT	NDST1	chr5	149877339	149937773	+	SYNPO	yes
TCGA-CW-6090	wild-type	low RT	NEDD4L	chr18	55711609	56068772	+	MIR122
TCGA-CW-6090	wild-type	low RT	NFIC	chr19	3359560	3469215	+
TCGA-CW-6090	wild-type	low RT	NLRC5	chr16	57050985	57117436	+	CPNE2	yes
TCGA-CW-6090	wild-type	low RT	NR4A1	chr12	52416615	52453291	+	ATG101
TCGA-CW-6090	wild-type	low RT	OSTC	chr4	109571740	109588978	+
TCGA-CW-6090	wild-type	low RT	PIP5K1A	chr1	151171020	151222007	+	PSMD4	yes
TCGA-CW-6090	wild-type	low RT	PLD6	chr17	17104308	17109646	-
TCGA-CW-6090	wild-type	low RT	PPIF	chr10	81107219	81115089	+
TCGA-CW-6090	wild-type	low RT	PROS1	chr3	93591880	93692934	-
TCGA-CW-6090	wild-type	low RT	PSMB6	chr17	4699438	4701798	+	PLD2	yes
TCGA-CW-6090	wild-type	low RT	PSMD4	chr1	151227196	151239954	+	ZNF687	no
TCGA-CW-6090	wild-type	low RT	PTGER4	chr5	40680031	40693837	+
TCGA-CW-6090	wild-type	low RT	PTPRS	chr19	5205518	5340814	-
TCGA-CW-6090	wild-type	low RT	PTTG1IP	chr21	46269499	46293818	-	SUMO3	yes
TCGA-CW-6090	wild-type	low RT	PXDC1	chr6	3722835	3752246	-	SLC22A23	no
TCGA-CW-6090	wild-type	low RT	RABAC1	chr19	42460832	42463528	-
TCGA-CW-6090	wild-type	low RT	RASGEF1B	chr4	82347546	82393082	-	PRKG2	yes
TCGA-CW-6090	wild-type	low RT	RC3H1	chr1	173900221	173962210	-	SERPINC1	no
TCGA-CW-6090	wild-type	low RT	RHOBTB3	chr5	95053336	95132071	+
TCGA-CW-6090	wild-type	low RT	RIOK3	chr18	21032786	21063099	+	C18orf8	no
TCGA-CW-6090	wild-type	low RT	RNF19A	chr8	101269286	101348446	-
TCGA-CW-6090	wild-type	low RT	SEL1L	chr14	81937890	82000205	-	LOC100506700
TCGA-CW-6090	wild-type	low RT	SEL1L3	chr4	25749048	25865217	-
TCGA-CW-6090	wild-type	low RT	SERPINB6	chr6	2948392	2972399	-	SERPINB9	yes
TCGA-CW-6090	wild-type	low RT	SIGMAR1	chr9	34634718	34637823	-	ARID3C	no
TCGA-CW-6090	wild-type	low RT	SLC41A1	chr1	205758220	205782161	-	RAB29
TCGA-CW-6090	wild-type	low RT	SNX12	chrX	70256097	70293276	-	SLC7A3	no
TCGA-CW-6090	wild-type	low RT	SPTLC2	chr14	77972339	78083110	-	ISM2	no
TCGA-CW-6090	wild-type	low RT	TACC1	chr8	38585703	38710546	+	PLEKHA2	yes
TCGA-CW-6090	wild-type	low RT	TMEM201	chr1	9648931	9674935	+	PIK3CD	yes
TCGA-CW-6090	wild-type	low RT	TMEM67	chr8	94767071	94831460	+
TCGA-CW-6090	wild-type	low RT	TMEM87B	chr2	112812799	112876895	+	FBLN7	yes
TCGA-CW-6090	wild-type	low RT	TNFRSF10D	chr8	22993100	23021543	-
TCGA-CW-6090	wild-type	low RT	TRA2A	chr7	23544400	23571660	-
TCGA-CW-6090	wild-type	low RT	TRAF6	chr11	36505316	36531863	-
TCGA-CW-6090	wild-type	low RT	TRIM16	chr17	15531279	15586193	-	CDRT1	no
TCGA-CW-6090	wild-type	low RT	TRIM66	chr11	8633583	8680383	-	STK33	no
TCGA-CW-6090	wild-type	low RT	TSPAN9	chr12	3186520	3395730	+	PRMT8	no
TCGA-CW-6090	wild-type	low RT	UFM1	chr13	38923907	38937144	+	LINC00366
TCGA-CW-6090	wild-type	low RT	UMPS	chr3	124449212	124468119	+
TCGA-CW-6090	wild-type	low RT	UPF3A	chr13	115047058	115071291	+	CHAMP1
TCGA-CW-6090	wild-type	low RT	USO1	chr4	76649705	76735442	+
TCGA-CW-6090	wild-type	low RT	USP22	chr17	20902905	20946352	-
TCGA-CW-6090	wild-type	low RT	UTP14A	chrX	129040096	129063738	+	BCORL1	no
TCGA-CW-6090	wild-type	low RT	YPEL5	chr2	30369749	30383399	+	LBH	yes
TCGA-CW-6090	wild-type	low RT	ZFYVE27	chr10	99496877	99520664	+
TCGA-CW-6090	wild-type	low RT	ZNF137P	chr19	53099936	53103405	+
TCGA-CW-6090	wild-type	low RT	ZNF202	chr11	123594996	123612363	-	SCN3B	no
TCGA-CW-6090	wild-type	low RT	ZNF251	chr8	145946293	145980970	-	ARHGAP39	no
TCGA-CW-6090	wild-type	low RT	ZNF266	chr19	9523101	9546254	-
TCGA-CW-6090	wild-type	low RT	ZNF311_1	chr6	28962593	28973037	-
TCGA-CW-6090	wild-type	low RT	ZNF362	chr1	33722173	33766320	+
TCGA-CW-6090	wild-type	low RT	ZNF43	chr19	21987750	22034870	-	ZNF100	no
TCGA-CW-6090	wild-type	low RT	ZNF655	chr7	99156044	99174076	+	GS1-259H13.2
TCGA-CW-6090	wild-type	low RT	ZNF738	chr19	21541734	21571384	+	ZNF493	no
TCGA-CW-6090	wild-type	low RT	ZNF805	chr19	57752052	57774106	+	ZNF460	no
TCGA-B0-5696	mutated	low RT	ACVRL1	chr12	52301201	52317145	+	ACVR1B	no
TCGA-B0-5696	mutated	low RT	ALG13	chrX	110924345	111003875	+
TCGA-B0-5696	mutated	low RT	ALPK2	chr18	56148481	56296189	-
TCGA-B0-5696	mutated	low RT	APOL6	chr22	36044423	36064456	+	APOL5	yes
TCGA-B0-5696	mutated	low RT	BRD2_1	chr6	32936436	32949282	+
TCGA-B0-5696	mutated	low RT	BTBD3	chr20	11871370	11907243	+
TCGA-B0-5696	mutated	low RT	BTF3	chr5	72794249	72801448	+
TCGA-B0-5696	mutated	low RT	C15orf39	chr15	75491232	75504510	+	GOLGA6C	no
TCGA-B0-5696	mutated	low RT	C19orf12	chr19	30189792	30206696	-
TCGA-B0-5696	mutated	low RT	CBY3	chr5	179105558	179107975	-	C5orf60	yes
TCGA-B0-5696	mutated	low RT	CCNG2	chr4	78078356	78091213	+	CXCL13	no
TCGA-B0-5696	mutated	low RT	CD209	chr19	7804880	7812464	-	CLEC4G	yes
TCGA-B0-5696	mutated	low RT	CLEC18B	chr16	74442528	74455649	-	LOC283922	no
TCGA-B0-5696	mutated	low RT	CLEC2D	chr12	9822303	9852151	+
TCGA-B0-5696	mutated	low RT	CLK4	chr5	178029664	178054054	-	COL23A1	yes
TCGA-B0-5696	mutated	low RT	CNOT8	chr5	154237808	154256352	+
TCGA-B0-5696	mutated	low RT	COL16A1	chr1	32117847	32169768	-	PEF1	no
TCGA-B0-5696	mutated	low RT	CUL3	chr2	225334866	225450114	-	FAM124B	yes
TCGA-B0-5696	mutated	low RT	DBR1	chr3	137879829	137893791	-	A4GNT	yes
TCGA-B0-5696	mutated	low RT	DYSF	chr2	71680752	71913893	+
TCGA-B0-5696	mutated	low RT	EPG5	chr18	43427573	43547305	-
TCGA-B0-5696	mutated	low RT	EPS15	chr1	51819934	51984995	-	TTC39A	yes
TCGA-B0-5696	mutated	low RT	FAM186B	chr12	49976657	49999433	-	MCRS1	no
TCGA-B0-5696	mutated	low RT	FAM200B	chr4	15683351	15692070	+	BST1	no
TCGA-B0-5696	mutated	low RT	FAT1	chr4	187508936	187644987	-	MTNR1A	no
TCGA-B0-5696	mutated	low RT	FBXO46	chr19	46213886	46234151	-
TCGA-B0-5696	mutated	low RT	FN3KRP	chr17	80674581	80685893	+	FN3K	no
TCGA-B0-5696	mutated	low RT	GPT2	chr16	46918307	46965201	+
TCGA-B0-5696	mutated	low RT	HCG9_1	chr6	29942891	29946177	+
TCGA-B0-5696	mutated	low RT	HELZ	chr17	65066553	65241319	-
TCGA-B0-5696	mutated	low RT	HMGCS1	chr5	43287571	43313614	-
TCGA-B0-5696	mutated	low RT	IGFBP5	chr2	217536827	217560272	-
TCGA-B0-5696	mutated	low RT	IREB2	chr15	78730517	78793798	+	HYKK
TCGA-B0-5696	mutated	low RT	IVD	chr15	40697685	40713512	+	BAHD1	no
TCGA-B0-5696	mutated	low RT	KDM4B	chr19	4969123	5153608	+
TCGA-B0-5696	mutated	low RT	KHDRBS1	chr1	32479294	32526460	+	TMEM39B	yes
TCGA-B0-5696	mutated	low RT	KIF3A	chr5	132028318	132073270	-
TCGA-B0-5696	mutated	low RT	KLF6	chr10	3818187	3827473	-	PITRM1	no
TCGA-B0-5696	mutated	low RT	LOC654342	chr2	91805187	91847975	-	IGKV3-11_2
TCGA-B0-5696	mutated	low RT	LSM4	chr19	18417039	18434001	-
TCGA-B0-5696	mutated	low RT	MAEA	chr4	1283638	1333936	+	UVSSA
TCGA-B0-5696	mutated	low RT	MGAM	chr7	141695678	141806547	+	LOC93432	no
TCGA-B0-5696	mutated	low RT	MMP9	chr20	44637546	44645200	+	SLC12A5	yes
TCGA-B0-5696	mutated	low RT	MTMR12	chr5	32227110	32313114	-	GOLPH3	no
TCGA-B0-5696	mutated	low RT	NDEL1	chr17	8339169	8371495	+
TCGA-B0-5696	mutated	low RT	NDRG1	chr8	134249413	134309547	-
TCGA-B0-5696	mutated	low RT	NEFM	chr8	24771273	24776606	+
TCGA-B0-5696	mutated	low RT	NRSN2	chr20	327369	335512	+	TRIB3	yes
TCGA-B0-5696	mutated	low RT	NUP205	chr7	135242661	135333499	+	C7orf73
TCGA-B0-5696	mutated	low RT	PARP1	chr1	226548391	226595801	-	LIN9	no
TCGA-B0-5696	mutated	low RT	PCNX	chr14	71374121	71582099	+	SNORD56B
TCGA-B0-5696	mutated	low RT	PIK3C2B	chr1	204391757	204459474	-	PPP1R15B	no
TCGA-B0-5696	mutated	low RT	PROS1	chr3	93591880	93692934	-
TCGA-B0-5696	mutated	low RT	PTPN13	chr4	87515467	87736328	+
TCGA-B0-5696	mutated	low RT	RAD23B	chr9	110045516	110094475	+
TCGA-B0-5696	mutated	low RT	SAYSD1	chr6	39071839	39082865	-
TCGA-B0-5696	mutated	low RT	SEC23A	chr14	39501122	39572437	-	LINC00639
TCGA-B0-5696	mutated	low RT	SERPINB1	chr6	2832565	2842283	-
TCGA-B0-5696	mutated	low RT	SIPA1L2	chr1	232533711	232651243	-
TCGA-B0-5696	mutated	low RT	STK40	chr1	36805219	36851528	-
TCGA-B0-5696	mutated	low RT	TMEM14C	chr6	10723147	10731362	+	TMEM14B	no
TCGA-B0-5696	mutated	low RT	TMEM2	chr9	74298281	74383800	-	TRPM3	no
TCGA-B0-5696	mutated	low RT	TRAF6	chr11	36505316	36531863	-
TCGA-B0-5696	mutated	low RT	TTYH3	chr7	2671602	2704436	+	AMZ1	yes
TCGA-B0-5696	mutated	low RT	UBL5	chr19	9938555	9940797	+	PIN1	no
TCGA-B0-5696	mutated	low RT	UGT2A3_1	chr4	69794176	69817509	-
TCGA-B0-5696	mutated	low RT	VAMP4	chr1	171669295	171711379	-	MYOC	no
TCGA-B0-5696	mutated	low RT	ZFP69	chr1	40943301	40962015	+	EXO5
TCGA-B0-5696	mutated	low RT	ZNF12	chr7	6728063	6746566	-
TCGA-B0-5696	mutated	low RT	ZNF137P	chr19	53099936	53103405	+
TCGA-B0-5696	mutated	low RT	ZNF43	chr19	21987750	22034870	-	ZNF100	no
TCGA-B0-5696	mutated	low RT	ZNF689	chr16	30613878	30622096	-	ZNF785	no
TCGA-CZ-5465	mutated	high RT	ABCD4	chr14	74751979	74769767	-
TCGA-CZ-5465	mutated	high RT	ACACB	chr12	109577201	109706030	+
TCGA-CZ-5465	mutated	high RT	ACSL4	chrX	108884563	108976621	-	KCNE1L	no
TCGA-CZ-5465	mutated	high RT	ACTB	chr7	5566778	5570232	-	FBXL18	no
TCGA-CZ-5465	mutated	high RT	ACTR2	chr2	65454828	65498390	+
TCGA-CZ-5465	mutated	high RT	AES	chr19	3052907	3062964	-	TLE2	no
TCGA-CZ-5465	mutated	high RT	AGL	chr1	100315639	100389579	+	SLC35A3	no
TCGA-CZ-5465	mutated	high RT	AGO4	chr1	36273827	36323490	+	AGO1
TCGA-CZ-5465	mutated	high RT	AGPAT9	chr4	84457066	84527027	+
TCGA-CZ-5465	mutated	high RT	AHCTF1	chr1	247002401	247094726	-
TCGA-CZ-5465	mutated	high RT	AHDC1	chr1	27860755	27930005	-	WASF2	yes
TCGA-CZ-5465	mutated	high RT	AKAP11	chr13	42846288	42897403	+	TNFSF11	yes
TCGA-CZ-5465	mutated	high RT	ALAS1	chr3	52232098	52248343	+
TCGA-CZ-5465	mutated	high RT	ALDH18A1	chr10	97365685	97416567	-	SORBS1	yes
TCGA-CZ-5465	mutated	high RT	ALDH1B1	chr9	38392660	38398662	+
TCGA-CZ-5465	mutated	high RT	ALDH7A1	chr5	125877532	125931082	-
TCGA-CZ-5465	mutated	high RT	ALG10B	chr12	38710556	38723528	+
TCGA-CZ-5465	mutated	high RT	ALG13	chrX	110924345	111003875	+
TCGA-CZ-5465	mutated	high RT	ALS2CL	chr3	46710484	46735194	-
TCGA-CZ-5465	mutated	high RT	AMPD2	chr1	110162434	110174677	+	GSTM4	no
TCGA-CZ-5465	mutated	high RT	ANAPC1_2	chr2	112525213	112641741	-	MIR4435-1HG
TCGA-CZ-5465	mutated	high RT	ANAPC5	chr12	121746047	121792012	-	CAMKK2	yes
TCGA-CZ-5465	mutated	high RT	ANKRD10	chr13	111530886	111567454	-	LINC00346
TCGA-CZ-5465	mutated	high RT	ANKRD34B	chr5	79852573	79866304	-
TCGA-CZ-5465	mutated	high RT	ANO5	chr11	22214721	22304913	+	SLC17A6
TCGA-CZ-5465	mutated	high RT	ANP32E	chr1	150190716	150208504	-
TCGA-CZ-5465	mutated	high RT	ANXA7	chr10	75135188	75173841	-	TTC18	no
TCGA-CZ-5465	mutated	high RT	AP2B1	chr17	33914281	34053436	+	RASL10B	no
TCGA-CZ-5465	mutated	high RT	API5	chr11	43333504	43366080	+	TTC17	no
TCGA-CZ-5465	mutated	high RT	APPBP2	chr17	58520509	58603601	-
TCGA-CZ-5465	mutated	high RT	ARC	chr8	143692404	143695833	-
TCGA-CZ-5465	mutated	high RT	ARF6	chr14	50359735	50363772	+	MIR6076
TCGA-CZ-5465	mutated	high RT	ARHGAP12	chr10	32094325	32217804	-
TCGA-CZ-5465	mutated	high RT	ARHGAP21	chr10	24872537	25012597	-
TCGA-CZ-5465	mutated	high RT	ARHGAP23	chr17	36584719	36668628	+
TCGA-CZ-5465	mutated	high RT	ARHGEF10L	chr1	17846826	18024370	+	ACTL8	no
TCGA-CZ-5465	mutated	high RT	ARHGEF19	chr1	16524598	16539104	-	EPHA2	no
TCGA-CZ-5465	mutated	high RT	ARL6	chr3	97483364	97520086	+	CRYBG3	no
TCGA-CZ-5465	mutated	high RT	ARPP19	chr15	52839431	52861364	-	MYO5A	no
TCGA-CZ-5465	mutated	high RT	ARSA	chr22	51061181	51066601	-
TCGA-CZ-5465	mutated	high RT	ASRGL1	chr11	62104773	62160887	+	SCGB1A1	no
TCGA-CZ-5465	mutated	high RT	ATP11C	chrX	138808504	138914447	-	MCF2	no
TCGA-CZ-5465	mutated	high RT	ATP2A3	chr17	3827162	3867758	-	P2RX1	yes
TCGA-CZ-5465	mutated	high RT	ATP9B	chr18	76829396	77138282	+	NFATC1	yes
TCGA-CZ-5465	mutated	high RT	ATRN	chr20	3451664	3631769	+
TCGA-CZ-5465	mutated	high RT	B3GNT7	chr2	232260334	232265875	+
TCGA-CZ-5465	mutated	high RT	BCAM	chr19	45312315	45324678	+	PVRL2	no
TCGA-CZ-5465	mutated	high RT	BCL2L1	chr20	30252260	30310656	-
TCGA-CZ-5465	mutated	high RT	BCL7A	chr12	122459860	122499950	+	MLXIP	no
TCGA-CZ-5465	mutated	high RT	BCLAF1	chr6	136578000	136610989	-	MTFR2
TCGA-CZ-5465	mutated	high RT	BCOR	chrX	39910498	40036582	-	LINC01282
TCGA-CZ-5465	mutated	high RT	BDP1	chr5	70751441	70863649	+	MCCC2	no
TCGA-CZ-5465	mutated	high RT	BEX4	chrX	102470019	102472128	+
TCGA-CZ-5465	mutated	high RT	BEX5	chrX	101408678	101410986	-	TCEAL6	no
TCGA-CZ-5465	mutated	high RT	BMF	chr15	40380090	40401085	-
TCGA-CZ-5465	mutated	high RT	BMPR2	chr2	203241049	203432474	+	FAM117B	no
TCGA-CZ-5465	mutated	high RT	BMS1	chr10	43277953	43330385	+	MIR5100
TCGA-CZ-5465	mutated	high RT	BPTF	chr17	65821779	65980494	+
TCGA-CZ-5465	mutated	high RT	C10orf35	chr10	71390002	71393355	+	COL13A1	yes
TCGA-CZ-5465	mutated	high RT	C10orf88	chr10	124690418	124713919	-
TCGA-CZ-5465	mutated	high RT	C12orf36	chr12	13523604	13529679	-
TCGA-CZ-5465	mutated	high RT	C12orf5	chr12	4430358	4469190	+
TCGA-CZ-5465	mutated	high RT	C16orf91	chr16	1469744	1479345	-	UNKL	no
TCGA-CZ-5465	mutated	high RT	C1orf159	chr1	1017197	1051736	-	RNF223
TCGA-CZ-5465	mutated	high RT	C1orf53	chr1	197871681	197876497	+	LHX9	no
TCGA-CZ-5465	mutated	high RT	C2CD2	chr21	43305218	43373999	-	PRDM15	no
TCGA-CZ-5465	mutated	high RT	C2CD4A	chr15	62359175	62363116	+
TCGA-CZ-5465	mutated	high RT	C5orf24	chr5	134181369	134195425	+	TXNDC15	no
TCGA-CZ-5465	mutated	high RT	C6orf123	chr6	168185218	168197539	-	LOC441178
TCGA-CZ-5465	mutated	high RT	C6orf203	chr6	107349375	107372790	+
TCGA-CZ-5465	mutated	high RT	C9orf84	chr9	114448798	114557288	-
TCGA-CZ-5465	mutated	high RT	CALCA	chr11	14988214	14993832	-	CYP2R1	no
TCGA-CZ-5465	mutated	high RT	CALM1	chr14	90863326	90874619	+	LINC00642
TCGA-CZ-5465	mutated	high RT	CAMK2N1	chr1	20808883	20812728	-	LINC01141
TCGA-CZ-5465	mutated	high RT	CAPRIN2	chr12	30862485	30907448	-	IPO8	no
TCGA-CZ-5465	mutated	high RT	CASC4	chr15	44580908	44707959	+	CTDSPL2	no
TCGA-CZ-5465	mutated	high RT	CBX4	chr17	77806954	77813213	-	CBX8	no
TCGA-CZ-5465	mutated	high RT	CBY3	chr5	179105558	179107975	-	C5orf60	no
TCGA-CZ-5465	mutated	high RT	CCDC93	chr2	118673053	118771739	-
TCGA-CZ-5465	mutated	high RT	CCL11	chr17	32612686	32615199	+	CCL8	no
TCGA-CZ-5465	mutated	high RT	CCL8	chr17	32646065	32648421	+	CCL13	no
TCGA-CZ-5465	mutated	high RT	CCND2	chr12	4382901	4414522	+	C12orf5	no
TCGA-CZ-5465	mutated	high RT	CCNY	chr10	35535908	35861598	+	GJD4	no
TCGA-CZ-5465	mutated	high RT	CD164	chr6	109687716	109703762	-
TCGA-CZ-5465	mutated	high RT	CD2AP	chr6	47445524	47594996	+	GPR111	no
TCGA-CZ-5465	mutated	high RT	CD46	chr1	207925382	207968861	+
TCGA-CZ-5465	mutated	high RT	CD47	chr3	107761940	107809935	-
TCGA-CZ-5465	mutated	high RT	CD83	chr6	14117486	14137148	+
TCGA-CZ-5465	mutated	high RT	CDK5RAP1	chr20	31946644	31989375	-
TCGA-CZ-5465	mutated	high RT	CDK5RAP2	chr9	123151146	123342448	-	TRNA_67
TCGA-CZ-5465	mutated	high RT	CDR2L	chr17	72983726	73001892	+	ICT1	no
TCGA-CZ-5465	mutated	high RT	CENPV	chr17	16245847	16256812	-
TCGA-CZ-5465	mutated	high RT	CEP170B	chr14	105331649	105363107	+	PLD4	yes
TCGA-CZ-5465	mutated	high RT	CEP350	chr1	179923907	180084015	+	QSOX1	yes
TCGA-CZ-5465	mutated	high RT	CHAMP1	chr13	115079964	115092803	+
TCGA-CZ-5465	mutated	high RT	CHD1L	chr1	146714290	146767447	+
TCGA-CZ-5465	mutated	high RT	CHGB	chr20	5891973	5906005	+
TCGA-CZ-5465	mutated	high RT	CKB	chr14	103985994	103989196	-
TCGA-CZ-5465	mutated	high RT	CLEC11A	chr19	51226604	51228981	+	GPR32	no
TCGA-CZ-5465	mutated	high RT	CLEC3B	chr3	45067758	45077563	+
TCGA-CZ-5465	mutated	high RT	CNEP1R1	chr16	50059116	50070999	+	HEATR3	no
TCGA-CZ-5465	mutated	high RT	COG2	chr1	230778201	230829731	+
TCGA-CZ-5465	mutated	high RT	COL12A1	chr6	75794041	75915623	-
TCGA-CZ-5465	mutated	high RT	COL1A2	chr7	94023872	94060544	+	CASD1	no
TCGA-CZ-5465	mutated	high RT	COL6A3	chr2	238232654	238322850	-
TCGA-CZ-5465	mutated	high RT	CPD	chr17	28705941	28796675	+	GOSR1	no
TCGA-CZ-5465	mutated	high RT	CPNE8	chr12	39046001	39299420	-
TCGA-CZ-5465	mutated	high RT	CPXM1	chr20	2774714	2781292	-
TCGA-CZ-5465	mutated	high RT	CREB3L1	chr11	46299188	46342972	+	DGKZ	yes
TCGA-CZ-5465	mutated	high RT	CREM	chr10	35415768	35501886	+	CCNY	no
TCGA-CZ-5465	mutated	high RT	CSRP1	chr1	201452657	201476387	-	PHLDA3	yes
TCGA-CZ-5465	mutated	high RT	CTGF	chr6	132269316	132272518	-
TCGA-CZ-5465	mutated	high RT	CTR9	chr11	10772810	10801290	+
TCGA-CZ-5465	mutated	high RT	CTTNBP2	chr7	117350705	117513561	-
TCGA-CZ-5465	mutated	high RT	CUL3	chr2	225334866	225450114	-	FAM124B	no
TCGA-CZ-5465	mutated	high RT	CUL5	chr11	107879407	107978488	+	ACAT1	no
TCGA-CZ-5465	mutated	high RT	CWH43	chr4	48988264	49064095	+	DCUN1D4	no
TCGA-CZ-5465	mutated	high RT	CXCL12	chr10	44865600	44880545	-
TCGA-CZ-5465	mutated	high RT	CXCL14	chr5	134906370	134914969	-	NEUROG1
TCGA-CZ-5465	mutated	high RT	CYCS	chr7	25158269	25164980	-	OSBPL3	no
TCGA-CZ-5465	mutated	high RT	CYP1A1	chr15	75011882	75017877	-	EDC3	no
TCGA-CZ-5465	mutated	high RT	DBT	chr1	100652477	100715409	-	LRRC39	yes
TCGA-CZ-5465	mutated	high RT	DCAF12L1	chrX	125683365	125686842	-	DCAF12L2	no
TCGA-CZ-5465	mutated	high RT	DCUN1D5	chr11	102921412	102962944	-	MMP13	no
TCGA-CZ-5465	mutated	high RT	DDX18	chr2	118572254	118589953	+
TCGA-CZ-5465	mutated	high RT	DDX6	chr11	118618472	118661972	-	TREH	no
TCGA-CZ-5465	mutated	high RT	DDX60	chr4	169137441	169239958	-
TCGA-CZ-5465	mutated	high RT	DDX60L	chr4	169277885	169401665	-	DDX60	no
TCGA-CZ-5465	mutated	high RT	DENND1B	chr1	197473878	197744623	-
TCGA-CZ-5465	mutated	high RT	DENND6A	chr3	57611180	57678816	-	ARF4	no
TCGA-CZ-5465	mutated	high RT	DFNA5	chr7	24737973	24797639	-
TCGA-CZ-5465	mutated	high RT	DHX35	chr20	37590980	37668366	+
TCGA-CZ-5465	mutated	high RT	DNAH5	chr5	13690436	13944589	-
TCGA-CZ-5465	mutated	high RT	DNAJA2	chr16	46989273	47007625	-
TCGA-CZ-5465	mutated	high RT	DNAJB1	chr19	14625575	14629371	-	GIPC1	no
TCGA-CZ-5465	mutated	high RT	DNAJB6	chr7	157129709	157210133	+	LOC101927914
TCGA-CZ-5465	mutated	high RT	DNAJC13	chr3	132136552	132257876	+
TCGA-CZ-5465	mutated	high RT	DNMT1	chr19	10244021	10305755	-	EIF3G	yes
TCGA-CZ-5465	mutated	high RT	DPY19L4	chr8	95732102	95806076	+	INTS8	yes
TCGA-CZ-5465	mutated	high RT	DUSP9	chrX	152907896	152916781	+
TCGA-CZ-5465	mutated	high RT	DYNC2H1	chr11	102980159	103350591	+	MIR4693
TCGA-CZ-5465	mutated	high RT	EAPP	chr14	34985134	35008943	-	SPTSSA
TCGA-CZ-5465	mutated	high RT	ECT2	chr3	172468474	172539264	+
TCGA-CZ-5465	mutated	high RT	EFCC1	chr3	128720471	128759585	+	GP9	yes
TCGA-CZ-5465	mutated	high RT	EFNB2	chr13	107142078	107187388	-
TCGA-CZ-5465	mutated	high RT	EFR3A	chr8	132916355	133025886	+
TCGA-CZ-5465	mutated	high RT	EIF4G3	chr1	21132784	21503381	-	HP1BP3	no
TCGA-CZ-5465	mutated	high RT	ELAVL1	chr19	8023456	8070529	-	TIMM44	yes
TCGA-CZ-5465	mutated	high RT	ELP3	chr8	27947747	28048669	+	PNOC	no
TCGA-CZ-5465	mutated	high RT	ENPP4	chr6	46097700	46114436	+
TCGA-CZ-5465	mutated	high RT	EOGT	chr3	69024362	69063045	-	FAM19A4	no
TCGA-CZ-5465	mutated	high RT	EPB41L5	chr2	120770603	120936697	+
TCGA-CZ-5465	mutated	high RT	EPS15	chr1	51819934	51984995	-	TTC39A	yes
TCGA-CZ-5465	mutated	high RT	EPS15L1	chr19	16466054	16582823	-
TCGA-CZ-5465	mutated	high RT	ERCC4	chr16	14014013	14046205	+
TCGA-CZ-5465	mutated	high RT	ESRRB	chr14	76837689	76968180	+	VASH1	yes
TCGA-CZ-5465	mutated	high RT	ESYT2	chr7	158523688	158622319	-	NCAPG2	no
TCGA-CZ-5465	mutated	high RT	ETF1	chr5	137841781	137878989	-
TCGA-CZ-5465	mutated	high RT	ETNK1	chr12	22778075	22843608	+	LOC101928441
TCGA-CZ-5465	mutated	high RT	EXOSC10	chr1	11126675	11159938	-	SRM	yes
TCGA-CZ-5465	mutated	high RT	FAF2	chr5	175875355	175937075	+
TCGA-CZ-5465	mutated	high RT	FAM104B	chrX	55169534	55187628	-
TCGA-CZ-5465	mutated	high RT	FAM109A	chr12	111798454	111806925	-
TCGA-CZ-5465	mutated	high RT	FAM124A	chr13	51796469	51858377	+	SERPINE3	no
TCGA-CZ-5465	mutated	high RT	FAM149A	chr4	187065994	187093817	+
TCGA-CZ-5465	mutated	high RT	FAM199X	chrX	103411155	103440582	+
TCGA-CZ-5465	mutated	high RT	FAM200A	chr7	99143922	99149757	-
TCGA-CZ-5465	mutated	high RT	FAM32A	chr19	16296234	16302857	+	AP1M1	yes
TCGA-CZ-5465	mutated	high RT	FAM46A	chr6	82455446	82462428	-
TCGA-CZ-5465	mutated	high RT	FAM81A	chr15	59730371	59815751	+	GCNT3	no
TCGA-CZ-5465	mutated	high RT	FAM84B	chr8	127564682	127570711	-
TCGA-CZ-5465	mutated	high RT	FAM91A1	chr8	124780881	124827690	+	FER1L6	no
TCGA-CZ-5465	mutated	high RT	FAR1	chr11	13690205	13753893	+	SPON1	yes
TCGA-CZ-5465	mutated	high RT	FBN1	chr15	48700502	48937985	-
TCGA-CZ-5465	mutated	high RT	FBXL12	chr19	9920942	9929731	-	ZNF846	no
TCGA-CZ-5465	mutated	high RT	FBXO32	chr8	124510126	124553493	-
TCGA-CZ-5465	mutated	high RT	FBXO46	chr19	46213886	46234151	-
TCGA-CZ-5465	mutated	high RT	FCGBP	chr19	40353962	40440533	-	FBL	yes
TCGA-CZ-5465	mutated	high RT	FERMT2	chr14	53323988	53417815	-	GNPNAT1	no
TCGA-CZ-5465	mutated	high RT	FGFBP3	chr10	93666344	93669258	-
TCGA-CZ-5465	mutated	high RT	FGFR2	chr10	123237843	123357972	-
TCGA-CZ-5465	mutated	high RT	FKBP4	chr12	2904107	2914587	+	ITFG2	no
TCGA-CZ-5465	mutated	high RT	FLYWCH1	chr16	2961979	3001209	+	KREMEN2	yes
TCGA-CZ-5465	mutated	high RT	FREM2	chr13	39261172	39461267	+
TCGA-CZ-5465	mutated	high RT	FRG1	chr4	190861973	190884359	+
TCGA-CZ-5465	mutated	high RT	FTSJ1	chrX	48334408	48344752	+	PORCN	no
TCGA-CZ-5465	mutated	high RT	FZD6	chr8	104310660	104345094	+	CTHRC1	yes
TCGA-CZ-5465	mutated	high RT	GABARAPL1	chr12	10365488	10375724	+	KLRD1	yes
TCGA-CZ-5465	mutated	high RT	GABRP	chr5	170210722	170241050	+	RANBP17	no
TCGA-CZ-5465	mutated	high RT	GAD1	chr2	171673199	171717659	+	GORASP2	no
TCGA-CZ-5465	mutated	high RT	GADD45B	chr19	2476122	2478257	+
TCGA-CZ-5465	mutated	high RT	GBP4	chr1	89646830	89664633	-	GBP7	yes
TCGA-CZ-5465	mutated	high RT	GCGR	chr17	79762007	79771889	+
TCGA-CZ-5465	mutated	high RT	GDAP1	chr8	75262617	75279335	+	MIR5681A
TCGA-CZ-5465	mutated	high RT	GEM	chr8	95261484	95274547	-	CDH17	no
TCGA-CZ-5465	mutated	high RT	GGCT	chr7	30536236	30544457	-	NOD1	yes
TCGA-CZ-5465	mutated	high RT	GKAP1	chr9	86354335	86444431	-
TCGA-CZ-5465	mutated	high RT	GLDC	chr9	6532463	6645692	-
TCGA-CZ-5465	mutated	high RT	GLTP	chr12	110288747	110318293	-
TCGA-CZ-5465	mutated	high RT	GMFB	chr14	54941208	54955744	-	CNIH1
TCGA-CZ-5465	mutated	high RT	GNA11	chr19	3094407	3124000	+	GNA15	yes
TCGA-CZ-5465	mutated	high RT	GNS	chr12	65107221	65153226	-
TCGA-CZ-5465	mutated	high RT	GOLGA4	chr3	37284681	37408370	+	C3orf35	yes
TCGA-CZ-5465	mutated	high RT	GOLGA5	chr14	93260575	93306306	+	CHGA	no
TCGA-CZ-5465	mutated	high RT	GORAB	chr1	170501262	170522974	+	PRRX1	no
TCGA-CZ-5465	mutated	high RT	GOT2	chr16	58741034	58768261	-	SLC38A7	no
TCGA-CZ-5465	mutated	high RT	GPAM	chr10	113909621	113943537	-
TCGA-CZ-5465	mutated	high RT	GPIHBP1	chr8	144295067	144299044	+	ZFP41	no
TCGA-CZ-5465	mutated	high RT	GPR98	chr5	89854616	90460033	+
TCGA-CZ-5465	mutated	high RT	GPT2	chr16	46918307	46965201	+
TCGA-CZ-5465	mutated	high RT	GSTP1	chr11	67351065	67354124	+	NDUFV1	no
TCGA-CZ-5465	mutated	high RT	HADH	chr4	108910869	108956331	+
TCGA-CZ-5465	mutated	high RT	HELZ	chr17	65066553	65241319	-
TCGA-CZ-5465	mutated	high RT	HERC2	chr15	28356182	28567298	-	OCA2	no
TCGA-CZ-5465	mutated	high RT	HERC2P7	chr15	23390721	23393943	+
TCGA-CZ-5465	mutated	high RT	HGSNAT	chr8	42995591	43057970	+	POTEA
TCGA-CZ-5465	mutated	high RT	HINT3	chr6	126277860	126301389	+	TRMT11	no
TCGA-CZ-5465	mutated	high RT	HKR1	chr19	37825579	37855357	+	ZNF527	no
TCGA-CZ-5465	mutated	high RT	HLA-DOA_1	chr6	32971959	32977389	-
TCGA-CZ-5465	mutated	high RT	HMG20B	chr19	3572942	3579081	+	GIPC3	yes
TCGA-CZ-5465	mutated	high RT	HMGB3	chrX	150148980	150159248	+	MIR4330
TCGA-CZ-5465	mutated	high RT	HMGCS1	chr5	43287571	43313614	-
TCGA-CZ-5465	mutated	high RT	HOOK1	chr1	60280462	60342050	+
TCGA-CZ-5465	mutated	high RT	HSD17B4	chr5	118788137	118878030	+	FAM170A	no
TCGA-CZ-5465	mutated	high RT	HSPH1	chr13	31709110	31736525	-
TCGA-CZ-5465	mutated	high RT	HUNK	chr21	33245627	33376377	+
TCGA-CZ-5465	mutated	high RT	HYOU1	chr11	118914895	118927957	-	SLC37A4	yes
TCGA-CZ-5465	mutated	high RT	ID4	chr6	19837600	19842431	+
TCGA-CZ-5465	mutated	high RT	IDNK	chr9	86237963	86259045	+
TCGA-CZ-5465	mutated	high RT	IFT88	chr13	21141207	21265576	+	IL17D	no
TCGA-CZ-5465	mutated	high RT	IL6	chr7	22766765	22771621	+
TCGA-CZ-5465	mutated	high RT	INPP1	chr2	191208195	191236391	+	MFSD6	no
TCGA-CZ-5465	mutated	high RT	IPO5	chr13	98605928	98676550	+	FARP1	no
TCGA-CZ-5465	mutated	high RT	IQCA1	chr2	237232789	237416178	-	ASB18	no
TCGA-CZ-5465	mutated	high RT	IQGAP1	chr15	90931472	91045475	+	CRTC3	no
TCGA-CZ-5465	mutated	high RT	IRS2	chr13	110406183	110438914	-
TCGA-CZ-5465	mutated	high RT	ITGA6	chr2	173292313	173371181	+	PDK1	yes
TCGA-CZ-5465	mutated	high RT	ITGA8	chr10	15555947	15762334	-	FAM171A1	no
TCGA-CZ-5465	mutated	high RT	ITGAV	chr2	187454789	187545629	+	FAM171B	yes
TCGA-CZ-5465	mutated	high RT	ITM2C	chr2	231729312	231743969	+	LOC151484
TCGA-CZ-5465	mutated	high RT	ITSN2	chr2	24425734	24583397	-
TCGA-CZ-5465	mutated	high RT	KANK1	chr9	470293	746106	+	DMRT1	yes
TCGA-CZ-5465	mutated	high RT	KAT6A	chr8	41786996	41909505	-	ANK1	yes
TCGA-CZ-5465	mutated	high RT	KCNE4	chr2	223916647	223920357	+
TCGA-CZ-5465	mutated	high RT	KIAA0040	chr1	175126122	175162229	-
TCGA-CZ-5465	mutated	high RT	KIAA0232	chr4	6784458	6885899	+	TBC1D14	no
TCGA-CZ-5465	mutated	high RT	KIAA1109	chr4	123091757	123283914	+	ADAD1	yes
TCGA-CZ-5465	mutated	high RT	KIAA1456	chr8	12803150	12889012	+
TCGA-CZ-5465	mutated	high RT	KIAA2013	chr1	11979644	11986485	-	NPPB	no
TCGA-CZ-5465	mutated	high RT	KIAA2018	chr3	113367232	113415493	-
TCGA-CZ-5465	mutated	high RT	KIF21A	chr12	39687029	39837192	-	CPNE8	yes
TCGA-CZ-5465	mutated	high RT	KIF3A	chr5	132028318	132073270	-
TCGA-CZ-5465	mutated	high RT	KIT	chr4	55524094	55606881	+
TCGA-CZ-5465	mutated	high RT	KLF13	chr15	31619082	31670102	+
TCGA-CZ-5465	mutated	high RT	KLF5	chr13	73629113	73651680	+	LINC00392
TCGA-CZ-5465	mutated	high RT	KLF9	chr9	72999512	73029573	-
TCGA-CZ-5465	mutated	high RT	KLHDC10	chr7	129710348	129775560	+
TCGA-CZ-5465	mutated	high RT	KLHL24	chr3	183353410	183402304	+	YEATS2	yes
TCGA-CZ-5465	mutated	high RT	KLHL42	chr12	27933186	27955973	+
TCGA-CZ-5465	mutated	high RT	KNG1	chr3	186435097	186462199	+	EIF4A2	no
TCGA-CZ-5465	mutated	high RT	L1CAM	chrX	153126968	153151628	-	PDZD4	no
TCGA-CZ-5465	mutated	high RT	LAMP2	chrX	119560002	119603204	-
TCGA-CZ-5465	mutated	high RT	LAPTM4A	chr2	20232410	20251789	-	MATN3	no
TCGA-CZ-5465	mutated	high RT	LATS1	chr6	149979288	150039392	-	KATNA1	no
TCGA-CZ-5465	mutated	high RT	LEMD2	chr6	33738989	33756906	-	IP6K3	no
TCGA-CZ-5465	mutated	high RT	LGMN	chr14	93170151	93215047	-
TCGA-CZ-5465	mutated	high RT	LINC00323	chr21	42513426	42519991	-	DSCAM	yes
TCGA-CZ-5465	mutated	high RT	LIX1	chr5	96427573	96478520	-
TCGA-CZ-5465	mutated	high RT	LMO3	chr12	16701305	16761148	-
TCGA-CZ-5465	mutated	high RT	LOC100506136	chr7	96250968	96293650	-	C7orf76
TCGA-CZ-5465	mutated	high RT	LOC728743	chr7	150102839	150109558	+	LINC00996
TCGA-CZ-5465	mutated	high RT	LONRF2	chr2	100889752	100939195	-
TCGA-CZ-5465	mutated	high RT	LRP5	chr11	68080076	68216743	+	PPP6R3
TCGA-CZ-5465	mutated	high RT	LRPPRC	chr2	44113362	44223144	-
TCGA-CZ-5465	mutated	high RT	LRRC58	chr3	120043575	120068186	-	GPR156	no
TCGA-CZ-5465	mutated	high RT	LRRC8B	chr1	89990396	90063420	+
TCGA-CZ-5465	mutated	high RT	LSM14A	chr19	34663351	34720420	+	KIAA0355	no
TCGA-CZ-5465	mutated	high RT	LYRM9	chr17	26205339	26220409	-	NOS2	no
TCGA-CZ-5465	mutated	high RT	MAN2A2	chr15	91446565	91465815	+	UNC45A	no
TCGA-CZ-5465	mutated	high RT	MANBA	chr4	103552642	103682151	-
TCGA-CZ-5465	mutated	high RT	MANBAL	chr20	35918050	35945663	+	SRC	no
TCGA-CZ-5465	mutated	high RT	MAP2K5	chr15	67835020	68099455	+	SKOR1
TCGA-CZ-5465	mutated	high RT	MAP3K1	chr5	56110899	56191978	+	SETD9
TCGA-CZ-5465	mutated	high RT	MAP3K7	chr6	91223291	91297020	-
TCGA-CZ-5465	mutated	high RT	MAP3K8	chr10	30722949	30750762	+
TCGA-CZ-5465	mutated	high RT	MAP9	chr4	156263811	156298122	-
TCGA-CZ-5465	mutated	high RT	MAPK13	chr6	36098260	36112301	+	BRPF3	no
TCGA-CZ-5465	mutated	high RT	MAPK8	chr10	49514681	49647402	+
TCGA-CZ-5465	mutated	high RT	MAPK9	chr5	179660594	179719071	-	RASGEF1C	no
TCGA-CZ-5465	mutated	high RT	MAPKAP1	chr9	128199672	128469513	-
TCGA-CZ-5465	mutated	high RT	MAPRE3	chr2	27193524	27250087	+	TMEM214	no
TCGA-CZ-5465	mutated	high RT	MARK3	chr14	103851700	103970166	+
TCGA-CZ-5465	mutated	high RT	MARVELD1	chr10	99473464	99477909	+	ZFYVE27	no
TCGA-CZ-5465	mutated	high RT	MBIP	chr14	36767763	36789882	-	PTCSC3
TCGA-CZ-5465	mutated	high RT	MBNL2	chr13	97874549	98046374	+	RAP2A	no
TCGA-CZ-5465	mutated	high RT	MBP	chr18	74690788	74844774	-
TCGA-CZ-5465	mutated	high RT	MCCC2	chr5	70883114	70954530	+	CARTPT	yes
TCGA-CZ-5465	mutated	high RT	MCM3	chr6	52128811	52149679	-	IL17F	no
TCGA-CZ-5465	mutated	high RT	MEX3B	chr15	82334118	82338484	-
TCGA-CZ-5465	mutated	high RT	MFSD5	chr12	53645369	53648190	+	ESPL1	yes
TCGA-CZ-5465	mutated	high RT	MGC27382	chr1	78695282	78835147	+	PTGFR	no
TCGA-CZ-5465	mutated	high RT	MGC45800	chr4	183060158	183065668	-	LINC00290
TCGA-CZ-5465	mutated	high RT	MKRN1	chr7	140152839	140179369	-
TCGA-CZ-5465	mutated	high RT	MMP7	chr11	102391238	102401478	-	TMEM123	no
TCGA-CZ-5465	mutated	high RT	MPC1	chr6	166778407	166796501	-
TCGA-CZ-5465	mutated	high RT	MPP3	chr17	41878166	41910547	-
TCGA-CZ-5465	mutated	high RT	MPRIP	chr17	16946073	17095962	+
TCGA-CZ-5465	mutated	high RT	MR1	chr1	181002560	181031074	+	IER5	yes
TCGA-CZ-5465	mutated	high RT	MRFAP1L1	chr4	6709428	6711606	-
TCGA-CZ-5465	mutated	high RT	MRPL11	chr11	66202545	66206319	-
TCGA-CZ-5465	mutated	high RT	MRPL23	chr11	1968501	1977839	+
TCGA-CZ-5465	mutated	high RT	MRPS31P5	chr13	52741844	52768602	-	NEK3	no
TCGA-CZ-5465	mutated	high RT	MSL3	chrX	11776277	11793872	+	FRMPD4	no
TCGA-CZ-5465	mutated	high RT	MSL3P1	chr2	234774089	234777055	-	HJURP	yes
TCGA-CZ-5465	mutated	high RT	MTFMT	chr15	65293849	65321977	-	SPG21	no
TCGA-CZ-5465	mutated	high RT	MTM1	chrX	149737046	149841616	+	MTMR1	no
TCGA-CZ-5465	mutated	high RT	MTMR12	chr5	32227110	32313114	-	GOLPH3	no
TCGA-CZ-5465	mutated	high RT	MTR	chr1	236958580	237067281	+
TCGA-CZ-5465	mutated	high RT	MYO10	chr5	16662015	16936385	-
TCGA-CZ-5465	mutated	high RT	MYSM1	chr1	59120410	59165747	-	TACSTD2	no
TCGA-CZ-5465	mutated	high RT	NAAA	chr4	76831807	76862166	-	PPEF2	no
TCGA-CZ-5465	mutated	high RT	NAMPT	chr7	105888731	105925638	-	SYPL1	no
TCGA-CZ-5465	mutated	high RT	NAPG	chr18	10525872	10552766	+	LOC101927410
TCGA-CZ-5465	mutated	high RT	NAPSA	chr19	50861733	50868931	-	NAPSB	yes
TCGA-CZ-5465	mutated	high RT	NBAS	chr2	15307031	15701472	-
TCGA-CZ-5465	mutated	high RT	NCLN	chr19	3185874	3209573	+	CELF5	no
TCGA-CZ-5465	mutated	high RT	NDST1	chr5	149877339	149937773	+	SYNPO	yes
TCGA-CZ-5465	mutated	high RT	NDUFA4	chr7	10971579	10979813	-
TCGA-CZ-5465	mutated	high RT	NEDD4L	chr18	55711609	56068772	+	MIR122
TCGA-CZ-5465	mutated	high RT	NEFM	chr8	24771273	24776606	+
TCGA-CZ-5465	mutated	high RT	NEK1	chr4	170314420	170533778	-	SH3RF1	no
TCGA-CZ-5465	mutated	high RT	NEURL1B	chr5	172068275	172118533	+	LOC101928093
TCGA-CZ-5465	mutated	high RT	NF2	chr22	29999544	30094589	+	CABP7	no
TCGA-CZ-5465	mutated	high RT	NFATC4	chr14	24836116	24848811	+	NYNRIN	no
TCGA-CZ-5465	mutated	high RT	NFXL1	chr4	47849249	47916684	-	CORIN	no
TCGA-CZ-5465	mutated	high RT	NGDN	chr14	23938897	23947402	+	THTPA	no
TCGA-CZ-5465	mutated	high RT	NIN	chr14	51186480	51297839	-	SAV1	no
TCGA-CZ-5465	mutated	high RT	NKAPP1	chrX	119370308	119379122	-
TCGA-CZ-5465	mutated	high RT	NKX3-1	chr8	23536205	23540450	-
TCGA-CZ-5465	mutated	high RT	NOM1	chr7	156742416	156765876	+
TCGA-CZ-5465	mutated	high RT	NOV	chr8	120428551	120436678	+
TCGA-CZ-5465	mutated	high RT	NPHP1	chr2	110880913	110962639	-	MALL	yes
TCGA-CZ-5465	mutated	high RT	NPNT	chr4	106816596	106892828	+
TCGA-CZ-5465	mutated	high RT	NRIP1	chr21	16333555	16438231	-	LOC388813
TCGA-CZ-5465	mutated	high RT	NUDT12	chr5	102884555	102898502	-	LOC102467212
TCGA-CZ-5465	mutated	high RT	NUP205	chr7	135242661	135333499	+	C7orf73
TCGA-CZ-5465	mutated	high RT	NUP210	chr3	13357729	13461819	-	IQSEC1	no
TCGA-CZ-5465	mutated	high RT	NUP93	chr16	56764016	56878861	+	MIR138-2
TCGA-CZ-5465	mutated	high RT	NYNRIN	chr14	24867991	24888494	+
TCGA-CZ-5465	mutated	high RT	OAT	chr10	126085871	126107545	-	CHST15	yes
TCGA-CZ-5465	mutated	high RT	OSBPL3	chr7	24836155	25019831	-	DFNA5	no
TCGA-CZ-5465	mutated	high RT	OXR1	chr8	107282405	107764921	+
TCGA-CZ-5465	mutated	high RT	PADI2	chr1	17393255	17445948	-	SDHB	no
TCGA-CZ-5465	mutated	high RT	PAPOLG	chr2	60983364	61029221	+
TCGA-CZ-5465	mutated	high RT	PCDH18	chr4	138440072	138453652	-	LINC00613
TCGA-CZ-5465	mutated	high RT	PCGF5	chr10	92922768	93044088	+
TCGA-CZ-5465	mutated	high RT	PCM1	chr8	17780365	17887457	+
TCGA-CZ-5465	mutated	high RT	PCNX	chr14	71374121	71582099	+	SNORD56B
TCGA-CZ-5465	mutated	high RT	PDCD6IP	chr3	33840062	33911199	+
TCGA-CZ-5465	mutated	high RT	PDGFRA	chr4	55095263	55164412	+	KIT	no
TCGA-CZ-5465	mutated	high RT	PDS5B	chr13	33160563	33352158	+
TCGA-CZ-5465	mutated	high RT	PERP	chr6	138409641	138428660	-
TCGA-CZ-5465	mutated	high RT	PGAP1	chr2	197697727	197792519	-	C2orf66	yes
TCGA-CZ-5465	mutated	high RT	PGD	chr1	10459084	10480201	+	APITD1-CORT
TCGA-CZ-5465	mutated	high RT	PHLDA1	chr12	76419226	76425556	-	SNORA70_1	no
TCGA-CZ-5465	mutated	high RT	PIGR	chr1	207101866	207119811	-	FAIM3	yes
TCGA-CZ-5465	mutated	high RT	PIK3C2A	chr11	17108123	17191354	-	RPS13	yes
TCGA-CZ-5465	mutated	high RT	PIK3R1	chr5	67511583	67597649	+
TCGA-CZ-5465	mutated	high RT	PIM1	chr6	37137921	37143204	+
TCGA-CZ-5465	mutated	high RT	PIP5K1A	chr1	151171020	151222007	+	PSMD4	no
TCGA-CZ-5465	mutated	high RT	PKDCC	chr2	42275160	42285668	+
TCGA-CZ-5465	mutated	high RT	PLEKHB1	chr11	73357222	73373864	+
TCGA-CZ-5465	mutated	high RT	PMAIP1	chr18	57567191	57571538	+
TCGA-CZ-5465	mutated	high RT	PNMAL1	chr19	46969747	46974820	-	CCDC8	no
TCGA-CZ-5465	mutated	high RT	POP4	chr19	30097169	30108162	+	PLEKHF1	no
TCGA-CZ-5465	mutated	high RT	PPIF	chr10	81107219	81115089	+
TCGA-CZ-5465	mutated	high RT	PPM1K	chr4	89178760	89205983	-	ABCG2	yes
TCGA-CZ-5465	mutated	high RT	PPP1CB	chr2	28974613	29025806	+	SPDYA	yes
TCGA-CZ-5465	mutated	high RT	PPP1R3B	chr8	8993763	9009152	-
TCGA-CZ-5465	mutated	high RT	PPP1R3F	chrX	49126305	49144555	+	GAGE10	no
TCGA-CZ-5465	mutated	high RT	PPP6R3	chr11	68228185	68382801	+	GAL	no
TCGA-CZ-5465	mutated	high RT	PRKCD	chr3	53195222	53226733	+
TCGA-CZ-5465	mutated	high RT	PROX1	chr1	214161277	214214847	+	SMYD2	yes
TCGA-CZ-5465	mutated	high RT	PRR14	chr16	30662240	30667734	+	FBRS	no
TCGA-CZ-5465	mutated	high RT	PRSS22	chr16	2902727	2908171	-	PRSS30P	yes
TCGA-CZ-5465	mutated	high RT	PSEN1	chr14	73603142	73690399	+	PAPLN	yes
TCGA-CZ-5465	mutated	high RT	PSMD2	chr3	184016885	184026842	+	EIF4G1	no
TCGA-CZ-5465	mutated	high RT	PTAR1	chr9	72324437	72374876	-	APBA1	no
TCGA-CZ-5465	mutated	high RT	PTGER4	chr5	40680031	40693837	+
TCGA-CZ-5465	mutated	high RT	PTGS2	chr1	186640943	186649559	-	MIR548F1
TCGA-CZ-5465	mutated	high RT	PTP4A2	chr1	32372021	32403988	-	SPOCD1	yes
TCGA-CZ-5465	mutated	high RT	PTPN3	chr9	112137973	112260593	-	EPB41L4B	no
TCGA-CZ-5465	mutated	high RT	PTPRJ	chr11	48002109	48192394	+	OR4B1	no
TCGA-CZ-5465	mutated	high RT	PTPRK	chr6	128289923	128841870	-	THEMIS	yes
TCGA-CZ-5465	mutated	high RT	PVALB	chr22	37196744	37215517	-	IFT27	no
TCGA-CZ-5465	mutated	high RT	RAD23B	chr9	110045516	110094475	+
TCGA-CZ-5465	mutated	high RT	RALGAPA2	chr20	20370271	20693266	-
TCGA-CZ-5465	mutated	high RT	RAN	chr12	131356538	131362223	+	GPR133	no
TCGA-CZ-5465	mutated	high RT	RAPGEF2	chr4	160188997	160281301	+
TCGA-CZ-5465	mutated	high RT	RARS	chr5	167913462	167946309	+	FBLL1	no
TCGA-CZ-5465	mutated	high RT	RASEF	chr9	85594499	85678043	-
TCGA-CZ-5465	mutated	high RT	RB1CC1	chr8	53535017	53627026	-	FAM150A	no
TCGA-CZ-5465	mutated	high RT	RBM11	chr21	15588465	15600693	+	ABCC13	yes
TCGA-CZ-5465	mutated	high RT	RBM17	chr10	6130948	6159422	+	PFKFB3	no
TCGA-CZ-5465	mutated	high RT	RC3H1	chr1	173900221	173962210	-	SERPINC1	no
TCGA-CZ-5465	mutated	high RT	RCBTB2	chr13	49063098	49110118	-
TCGA-CZ-5465	mutated	high RT	RCC2	chr1	17733250	17766250	-
TCGA-CZ-5465	mutated	high RT	RCN2	chr15	77223961	77242601	+	PSTPIP1	yes
TCGA-CZ-5465	mutated	high RT	REST	chr4	57774041	57802010	+
TCGA-CZ-5465	mutated	high RT	RFX5	chr1	151313115	151319769	-	PI4KB	no
TCGA-CZ-5465	mutated	high RT	RGS16	chr1	182567757	182573548	-	RNASEL	no
TCGA-CZ-5465	mutated	high RT	RGS2	chr1	192778168	192781407	+
TCGA-CZ-5465	mutated	high RT	RGS3	chr9	116207008	116360023	+	ZNF618	no
TCGA-CZ-5465	mutated	high RT	RHBDD2	chr7	75508316	75518244	+	POR	no
TCGA-CZ-5465	mutated	high RT	RHOBTB3	chr5	95053336	95132071	+
TCGA-CZ-5465	mutated	high RT	RIOK2	chr5	96496570	96519005	-	LIX1	no
TCGA-CZ-5465	mutated	high RT	RNF111	chr15	59279864	59389618	+	CCNB2	yes
TCGA-CZ-5465	mutated	high RT	RNF112	chr17	19314490	19320589	+	TRNA_Trp_4
TCGA-CZ-5465	mutated	high RT	RNF38	chr9	36336398	36401195	-	GNE	no
TCGA-CZ-5465	mutated	high RT	RNF44	chr5	175953699	175964421	-
TCGA-CZ-5465	mutated	high RT	RNF6	chr13	26786904	26796508	-	SHISA2	no
TCGA-CZ-5465	mutated	high RT	RPGR	chrX	38128422	38186788	-	SRPX	yes
TCGA-CZ-5465	mutated	high RT	RPS6KA3	chrX	20168028	20285523	-	EIF1AX	no
TCGA-CZ-5465	mutated	high RT	SAMD9L	chr7	92759367	92777680	-	SAMD9	no
TCGA-CZ-5465	mutated	high RT	SBNO1	chr12	123773655	123834988	-	CDK2AP1	no
TCGA-CZ-5465	mutated	high RT	SCAF11	chr12	46312913	46384401	-
TCGA-CZ-5465	mutated	high RT	SCARA3	chr8	27491576	27534286	+
TCGA-CZ-5465	mutated	high RT	SCNN1B	chr16	23313590	23392620	+
TCGA-CZ-5465	mutated	high RT	SCPEP1	chr17	55055467	55084129	+	RNF126P1	no
TCGA-CZ-5465	mutated	high RT	SDC1	chr2	20400557	20425194	-	LAPTM4A	no
TCGA-CZ-5465	mutated	high RT	SDE2	chr1	226170402	226187066	-	LEFTY2	no
TCGA-CZ-5465	mutated	high RT	SDPR	chr2	192699031	192712006	-
TCGA-CZ-5465	mutated	high RT	SDSL	chr12	113860215	113876081	+
TCGA-CZ-5465	mutated	high RT	SEC23IP	chr10	121652084	121704170	+	MIR4682
TCGA-CZ-5465	mutated	high RT	SEC24A	chr5	133984474	134063601	+	CAMLG	yes
TCGA-CZ-5465	mutated	high RT	SEC63	chr6	108188959	108279482	-	SCML4	no
TCGA-CZ-5465	mutated	high RT	SEL1L	chr14	81937890	82000205	-	LOC100506700
TCGA-CZ-5465	mutated	high RT	SELENBP1	chr1	151336777	151345210	-	RFX5	no
TCGA-CZ-5465	mutated	high RT	SERINC5	chr5	79407049	79551898	-	CTD-2201I18.1
TCGA-CZ-5465	mutated	high RT	SERPINB1	chr6	2832565	2842283	-
TCGA-CZ-5465	mutated	high RT	SET	chr9	131445933	131458675	+	PKN3	no
TCGA-CZ-5465	mutated	high RT	SETX	chr9	135136826	135230372	-
TCGA-CZ-5465	mutated	high RT	SGPP1	chr14	64150934	64194756	-	WDR89	no
TCGA-CZ-5465	mutated	high RT	SH3GLB1	chr1	87170252	87213867	+
TCGA-CZ-5465	mutated	high RT	SIGMAR1	chr9	34634718	34637823	-	ARID3C	yes
TCGA-CZ-5465	mutated	high RT	SIKE1	chr1	115312104	115323308	-	CSDE1	no
TCGA-CZ-5465	mutated	high RT	SIPA1L1	chr14	71996028	72207946	+	RGS6	no
TCGA-CZ-5465	mutated	high RT	SIX2	chr2	45232323	45236542	-
TCGA-CZ-5465	mutated	high RT	SIX4	chr14	61176255	61191039	-	SIX1	yes
TCGA-CZ-5465	mutated	high RT	SKIL	chr3	170075472	170114637	+	CLDN11	no
TCGA-CZ-5465	mutated	high RT	SLC17A5	chr6	74303101	74363737	-	EEF1A1	yes
TCGA-CZ-5465	mutated	high RT	SLC18B1	chr6	133090506	133119747	-	VNN2	no
TCGA-CZ-5465	mutated	high RT	SLC25A38	chr3	39424814	39438819	+	RPSA	no
TCGA-CZ-5465	mutated	high RT	SLC35C1	chr11	45825622	45834567	+	CRY2	no
TCGA-CZ-5465	mutated	high RT	SLC38A1	chr12	46576839	46663208	-	SCAF11
TCGA-CZ-5465	mutated	high RT	SLC38A2	chr12	46751970	46766645	-	SLC38A1	no
TCGA-CZ-5465	mutated	high RT	SLC38A4	chr12	47158543	47219780	-
TCGA-CZ-5465	mutated	high RT	SLC41A1	chr1	205758220	205782161	-	RAB29
TCGA-CZ-5465	mutated	high RT	SLC44A2	chr19	10713120	10755235	+
TCGA-CZ-5465	mutated	high RT	SLC45A3	chr1	205626980	205649630	-	ELK4	no
TCGA-CZ-5465	mutated	high RT	SLC4A1	chr17	42325757	42345502	-	UBTF	no
TCGA-CZ-5465	mutated	high RT	SLC4A3	chr2	220492291	220506702	+
TCGA-CZ-5465	mutated	high RT	SLC4A4	chr4	72053002	72437804	+
TCGA-CZ-5465	mutated	high RT	SLC9A8	chr20	48429249	48508779	+
TCGA-CZ-5465	mutated	high RT	SLCO3A1	chr15	92396937	92715665	+	ST8SIA2	no
TCGA-CZ-5465	mutated	high RT	SLITRK4	chrX	142710594	142723926	-	SPANXN3	no
TCGA-CZ-5465	mutated	high RT	SLTM	chr15	59171243	59225852	-
TCGA-CZ-5465	mutated	high RT	SMAD7	chr18	46446222	46477081	-
TCGA-CZ-5465	mutated	high RT	SMARCA2	chr9	2015218	2193623	+
TCGA-CZ-5465	mutated	high RT	SMEK1	chr14	91923824	91976824	-	CCDC88C	no
TCGA-CZ-5465	mutated	high RT	SNX16	chr8	82711817	82754521	-
TCGA-CZ-5465	mutated	high RT	SNX29	chr16	12070601	12668146	+
TCGA-CZ-5465	mutated	high RT	SNX9	chr6	158244202	158366109	+	SYNJ2	no
TCGA-CZ-5465	mutated	high RT	SP100	chr2	231280870	231410317	+
TCGA-CZ-5465	mutated	high RT	SPDL1	chr5	169010637	169031781	+	DOCK2	yes
TCGA-CZ-5465	mutated	high RT	SPP1	chr4	88896801	88904563	+	PKD2	no
TCGA-CZ-5465	mutated	high RT	SPTLC2	chr14	77972339	78083110	-	ISM2	no
TCGA-CZ-5465	mutated	high RT	SSFA2	chr2	182756442	182795464	+	PPP1R1C	no
TCGA-CZ-5465	mutated	high RT	SSTR1	chr14	38677203	38682268	+
TCGA-CZ-5465	mutated	high RT	STAG2	chrX	123094409	123236505	+	SH2D1A	yes
TCGA-CZ-5465	mutated	high RT	STK17B	chr2	196998306	197041227	-	DNAH7	no
TCGA-CZ-5465	mutated	high RT	STX12	chr1	28099693	28150963	+	PPP1R8	no
TCGA-CZ-5465	mutated	high RT	STX2	chr12	131274144	131323819	-	RIMBP2	no
TCGA-CZ-5465	mutated	high RT	SUPV3L1	chr10	70939992	70968849	+
TCGA-CZ-5465	mutated	high RT	SUV420H1	chr11	67922329	67981239	-	CHKA	no
TCGA-CZ-5465	mutated	high RT	TAF15	chr17	34136458	34174246	+
TCGA-CZ-5465	mutated	high RT	TAGLN3	chr3	111717585	111732735	+	TMPRSS7	no
TCGA-CZ-5465	mutated	high RT	TAMM41	chr3	11831915	11888393	-	VGLL4	no
TCGA-CZ-5465	mutated	high RT	TARBP1	chr1	234527058	234614849	-
TCGA-CZ-5465	mutated	high RT	TBC1D13	chr9	131549485	131572711	+	ENDOG	no
TCGA-CZ-5465	mutated	high RT	TBC1D23	chr3	99979660	100044096	+	NIT2	yes
TCGA-CZ-5465	mutated	high RT	TBKBP1	chr17	45772629	45789429	+	TBX21	yes
TCGA-CZ-5465	mutated	high RT	TBX3	chr12	115108058	115121969	-
TCGA-CZ-5465	mutated	high RT	TCEAL2	chrX	101380659	101382684	+
TCGA-CZ-5465	mutated	high RT	TCEAL7	chrX	102585113	102587251	+	WBP5	no
TCGA-CZ-5465	mutated	high RT	TEF	chr22	41763336	41795332	+
TCGA-CZ-5465	mutated	high RT	TEP1	chr14	20833825	20881579	-
TCGA-CZ-5465	mutated	high RT	TFAP2C	chr20	55204357	55214338	+
TCGA-CZ-5465	mutated	high RT	TFCP2L1	chr2	121974163	122042778	-
TCGA-CZ-5465	mutated	high RT	TFDP1	chr13	114239002	114295788	+
TCGA-CZ-5465	mutated	high RT	TGDS	chr13	95226307	95248511	-	TRNA_7
TCGA-CZ-5465	mutated	high RT	TIPRL	chr1	168148082	168171351	+	TBX19	yes
TCGA-CZ-5465	mutated	high RT	TLK2	chr17	60536018	60692841	+	MRC2	no
TCGA-CZ-5465	mutated	high RT	TMEM128	chr4	4237268	4249969	-	OTOP1	no
TCGA-CZ-5465	mutated	high RT	TMEM130	chr7	98444110	98467673	-
TCGA-CZ-5465	mutated	high RT	TMEM170A	chr16	75477141	75498584	-	CFDP1	yes
TCGA-CZ-5465	mutated	high RT	TMPRSS3	chr21	43791995	43816955	-	TFF1	no
TCGA-CZ-5465	mutated	high RT	TMSB4X	chrX	12993225	12995346	+
TCGA-CZ-5465	mutated	high RT	TNFRSF11B	chr8	119935795	119964383	-
TCGA-CZ-5465	mutated	high RT	TNFRSF19	chr13	24144508	24250244	+
TCGA-CZ-5465	mutated	high RT	TNFSF15	chr9	117546914	117568408	-	LOC100505478
TCGA-CZ-5465	mutated	high RT	TPM4	chr19	16178316	16213813	+	RAB8A	no
TCGA-CZ-5465	mutated	high RT	TPP2	chr13	103249285	103331523	+
TCGA-CZ-5465	mutated	high RT	TRA2A	chr7	23544400	23571660	-
TCGA-CZ-5465	mutated	high RT	TRAF6	chr11	36505316	36531863	-
TCGA-CZ-5465	mutated	high RT	TRIM26_1	chr6	30152231	30181271	-
TCGA-CZ-5465	mutated	high RT	TRIM66	chr11	8633583	8680383	-	STK33	no
TCGA-CZ-5465	mutated	high RT	TRPM7	chr15	50849351	50979012	-	USP50	no
TCGA-CZ-5465	mutated	high RT	TSEN15	chr1	184020784	184043344	+	C1orf21	no
TCGA-CZ-5465	mutated	high RT	TSN	chr2	122513120	122525428	+	CNTNAP5	no
TCGA-CZ-5465	mutated	high RT	TUBB8	chr10	92827	95178	-
TCGA-CZ-5465	mutated	high RT	TUBGCP5	chr15	22833394	22873891	+	CYFIP1	no
TCGA-CZ-5465	mutated	high RT	TWSG1	chr18	9334764	9402418	+	RALBP1	no
TCGA-CZ-5465	mutated	high RT	UBE2QL1	chr5	6448735	6496834	+	LINC01018
TCGA-CZ-5465	mutated	high RT	UBR1	chr15	43235097	43398286	-	TTBK2	no
TCGA-CZ-5465	mutated	high RT	UGT2B10_1	chr4	69681710	69697735	+
TCGA-CZ-5465	mutated	high RT	UHMK1	chr1	162466963	162499419	+	UAP1	yes
TCGA-CZ-5465	mutated	high RT	UMPS	chr3	124449212	124468119	+
TCGA-CZ-5465	mutated	high RT	UPF2	chr10	11962020	12085169	-	PROSER2-AS1
TCGA-CZ-5465	mutated	high RT	USP28	chr11	113668596	113746292	-
TCGA-CZ-5465	mutated	high RT	USP7	chr16	8985950	9057341	-	CARHSP1	no
TCGA-CZ-5465	mutated	high RT	UTP11L	chr1	38478383	38490497	+
TCGA-CZ-5465	mutated	high RT	UTP23	chr8	117778741	117786921	+
TCGA-CZ-5465	mutated	high RT	VANGL2	chr1	160370363	160398468	+
TCGA-CZ-5465	mutated	high RT	VAPA	chr18	9913954	9960018	+
TCGA-CZ-5465	mutated	high RT	VAPB	chr20	56964174	57026156	+
TCGA-CZ-5465	mutated	high RT	VHL	chr3	10183318	10195354	+	IRAK2	yes
TCGA-CZ-5465	mutated	high RT	VMA21	chrX	150565656	150577836	+	PASD1	no
TCGA-CZ-5465	mutated	high RT	VPS4B	chr18	61056424	61089752	-	KDSR	yes
TCGA-CZ-5465	mutated	high RT	WBP5	chrX	102611379	102613397	+	NGFRAP1	no
TCGA-CZ-5465	mutated	high RT	WFDC2	chr20	44098393	44110172	+
TCGA-CZ-5465	mutated	high RT	WIPI2	chr7	5229834	5273486	+	SLC29A4	yes
TCGA-CZ-5465	mutated	high RT	WISP1	chr8	134203281	134243932	+
TCGA-CZ-5465	mutated	high RT	WNT10A	chr2	219745254	219758651	+
TCGA-CZ-5465	mutated	high RT	WNT11	chr11	75897369	75921803	-
TCGA-CZ-5465	mutated	high RT	WNT5A	chr3	55499742	55521670	-
TCGA-CZ-5465	mutated	high RT	WRNIP1	chr6	2765665	2785979	+
TCGA-CZ-5465	mutated	high RT	WWC3	chrX	9983794	10112518	+	CLCN4	no
TCGA-CZ-5465	mutated	high RT	XIAP	chrX	122993661	123047829	+	STAG2	no
TCGA-CZ-5465	mutated	high RT	XPNPEP1	chr10	111624523	111683311	-
TCGA-CZ-5465	mutated	high RT	XPO6	chr16	28109297	28223239	-	GSG1L	no
TCGA-CZ-5465	mutated	high RT	XRN2	chr20	21283941	21370463	+
TCGA-CZ-5465	mutated	high RT	YTHDC1_1	chr4	69176104	69215824	-	TMPRSS11B	no
TCGA-CZ-5465	mutated	high RT	ZC3H6	chr2	113033177	113097640	+
TCGA-CZ-5465	mutated	high RT	ZC3H7B	chr22	41697506	41756151	+	TEF	no
TCGA-CZ-5465	mutated	high RT	ZC3HAV1	chr7	138728265	138794465	-	ZC3HAV1L	yes
TCGA-CZ-5465	mutated	high RT	ZCCHC6	chr9	88902647	88969402	-	ISCA1	no
TCGA-CZ-5465	mutated	high RT	ZDBF2	chr2	207139364	207179150	+	ADAM23	no
TCGA-CZ-5465	mutated	high RT	ZDHHC21	chr9	14555480	14693480	-	TRNA_His_10
TCGA-CZ-5465	mutated	high RT	ZDHHC7	chr16	85008066	85045141	-
TCGA-CZ-5465	mutated	high RT	ZDHHC8P1	chr22	23732791	23744799	-	CES5AP1
TCGA-CZ-5465	mutated	high RT	ZFP36L1	chr14	69254371	69262960	-
TCGA-CZ-5465	mutated	high RT	ZFR	chr5	32354455	32444844	-	MTMR12	no
TCGA-CZ-5465	mutated	high RT	ZFYVE27	chr10	99496877	99520664	+
TCGA-CZ-5465	mutated	high RT	ZKSCAN1	chr7	99613194	99639312	+	ZSCAN21	no
TCGA-CZ-5465	mutated	high RT	ZMPSTE24	chr1	40723721	40759856	+
TCGA-CZ-5465	mutated	high RT	ZNF12	chr7	6728063	6746566	-
TCGA-CZ-5465	mutated	high RT	ZNF133	chr20	18268926	18297640	+	LINC00851
TCGA-CZ-5465	mutated	high RT	ZNF185	chrX	152082985	152142025	+
TCGA-CZ-5465	mutated	high RT	ZNF200	chr16	3272324	3285457	-
TCGA-CZ-5465	mutated	high RT	ZNF222	chr19	44529493	44537262	+	ZNF223	no
TCGA-CZ-5465	mutated	high RT	ZNF229	chr19	44930422	44952766	-	ZNF285	no
TCGA-CZ-5465	mutated	high RT	ZNF232	chr17	5008838	5026397	-
TCGA-CZ-5465	mutated	high RT	ZNF260	chr19	37001588	37019248	-
TCGA-CZ-5465	mutated	high RT	ZNF264	chr19	57702867	57734214	+	AURKC	yes
TCGA-CZ-5465	mutated	high RT	ZNF282	chr7	148892576	148923339	+	ZNF212	no
TCGA-CZ-5465	mutated	high RT	ZNF302	chr19	35168543	35177302	+	ZNF181	no
TCGA-CZ-5465	mutated	high RT	ZNF330	chr4	142142040	142155850	+
TCGA-CZ-5465	mutated	high RT	ZNF331	chr19	54024176	54083523	+
TCGA-CZ-5465	mutated	high RT	ZNF33B	chr10	43084554	43133992	-	ZNF37BP
TCGA-CZ-5465	mutated	high RT	ZNF346	chr5	176449696	176508190	+	FGFR4	yes
TCGA-CZ-5465	mutated	high RT	ZNF362	chr1	33722173	33766320	+
TCGA-CZ-5465	mutated	high RT	ZNF418	chr19	58433251	58446740	-	ZNF417	no
TCGA-CZ-5465	mutated	high RT	ZNF599	chr19	35248978	35264134	-
TCGA-CZ-5465	mutated	high RT	ZNF626	chr19	20802744	20844402	-	ZNF737	yes
TCGA-CZ-5465	mutated	high RT	ZNF671	chr19	58231118	58238995	-	ZNF154	no
TCGA-CZ-5465	mutated	high RT	ZNF738	chr19	21541734	21571384	+	ZNF493	no
TCGA-CZ-5465	mutated	high RT	ZNF823	chr19	11832079	11849824	-
TCGA-CZ-5465	mutated	high RT	ZNF853	chr7	6655526	6663921	+	ZNF316
TCGA-CZ-5465	mutated	high RT	ZSCAN9	chr6	28193028	28201264	+
TCGA-CZ-5465	mutated	high RT	ZW10	chr11	113603904	113644485	-	TMPRSS5	no
TCGA-CJ-5679	wild-type	low RT	ACTR1B	chr2	98272401	98280561	-
TCGA-CJ-5679	wild-type	low RT	AEBP2	chr12	19592607	19675173	+	LOC100506393
TCGA-CJ-5679	wild-type	low RT	AHDC1	chr1	27860755	27930005	-	WASF2	no
TCGA-CJ-5679	wild-type	low RT	AKAP1	chr17	55162552	55198710	+	MSI2	no
TCGA-CJ-5679	wild-type	low RT	ALAD	chr9	116148591	116163618	-	HDHD3	yes
TCGA-CJ-5679	wild-type	low RT	APOL6	chr22	36044423	36064456	+	APOL5	yes
TCGA-CJ-5679	wild-type	low RT	ARL4C	chr2	235401685	235405697	-
TCGA-CJ-5679	wild-type	low RT	ATP5G1	chr17	46970147	46973232	+	UBE2Z	no
TCGA-CJ-5679	wild-type	low RT	ATP5G2	chr12	54058943	54070512	-	ATF7	no
TCGA-CJ-5679	wild-type	low RT	BCL2L1	chr20	30252260	30310656	-
TCGA-CJ-5679	wild-type	low RT	BCL7A	chr12	122459860	122499950	+	MLXIP	no
TCGA-CJ-5679	wild-type	low RT	C14orf79	chr14	105452615	105461855	+
TCGA-CJ-5679	wild-type	low RT	CAMLG	chr5	134074169	134087850	+	DDX46	no
TCGA-CJ-5679	wild-type	low RT	CBX4	chr17	77806954	77813213	-	CBX8	yes
TCGA-CJ-5679	wild-type	low RT	CCL20	chr2	228678557	228682280	+	DAW1
TCGA-CJ-5679	wild-type	low RT	CCND2	chr12	4382901	4414522	+	C12orf5	no
TCGA-CJ-5679	wild-type	low RT	CDK14	chr7	90095737	90839905	+	FZD1	yes
TCGA-CJ-5679	wild-type	low RT	CLEC11A	chr19	51226604	51228981	+	GPR32	no
TCGA-CJ-5679	wild-type	low RT	CLIP4	chr2	29320541	29406679	+
TCGA-CJ-5679	wild-type	low RT	CNOT8	chr5	154237808	154256352	+
TCGA-CJ-5679	wild-type	low RT	CREBBP	chr16	3775055	3930121	-	TRAP1	yes
TCGA-CJ-5679	wild-type	low RT	CUL1	chr7	148395932	148498202	+
TCGA-CJ-5679	wild-type	low RT	CXCL2	chr4	74962753	74964997	-	PPBPP2
TCGA-CJ-5679	wild-type	low RT	CYCS	chr7	25158269	25164980	-	OSBPL3	no
TCGA-CJ-5679	wild-type	low RT	CYP17A1	chr10	104590287	104597290	-
TCGA-CJ-5679	wild-type	low RT	DCAF12L1	chrX	125683365	125686842	-	DCAF12L2	no
TCGA-CJ-5679	wild-type	low RT	DCUN1D5	chr11	102921412	102962944	-	MMP13	yes
TCGA-CJ-5679	wild-type	low RT	DDX60L	chr4	169277885	169401665	-	DDX60	no
TCGA-CJ-5679	wild-type	low RT	DFNA5	chr7	24737973	24797639	-
TCGA-CJ-5679	wild-type	low RT	DLL4	chr15	41221530	41231258	+	CHAC1	no
TCGA-CJ-5679	wild-type	low RT	DNHD1	chr11	6518525	6593254	+
TCGA-CJ-5679	wild-type	low RT	ELP3	chr8	27947747	28048669	+	PNOC	yes
TCGA-CJ-5679	wild-type	low RT	EPG5	chr18	43427573	43547305	-
TCGA-CJ-5679	wild-type	low RT	ESYT2	chr7	158523688	158622319	-	NCAPG2	yes
TCGA-CJ-5679	wild-type	low RT	GATAD2A	chr19	19496641	19619741	+
TCGA-CJ-5679	wild-type	low RT	GBAS	chr7	56032269	56067875	+
TCGA-CJ-5679	wild-type	low RT	GFPT2	chr5	179727699	179780315	-	MAPK9	yes
TCGA-CJ-5679	wild-type	low RT	GK5	chr3	141876368	141944449	-	TFDP2	no
TCGA-CJ-5679	wild-type	low RT	GOLPH3	chr5	32124823	32174425	-
TCGA-CJ-5679	wild-type	low RT	GRASP	chr12	52400728	52409673	+	NR4A1	no
TCGA-CJ-5679	wild-type	low RT	GTF2A2	chr15	59930260	59949737	-
TCGA-CJ-5679	wild-type	low RT	H2AFV	chr7	44866487	44887725	-
TCGA-CJ-5679	wild-type	low RT	HIATL1	chr9	97136832	97223202	+	PCAT7
TCGA-CJ-5679	wild-type	low RT	HMGCS1	chr5	43287571	43313614	-
TCGA-CJ-5679	wild-type	low RT	IFT81	chr12	110562139	110656600	+	ATP2A2	yes
TCGA-CJ-5679	wild-type	low RT	IGFBP5	chr2	217536827	217560272	-
TCGA-CJ-5679	wild-type	low RT	ITGA6	chr2	173292313	173371181	+	PDK1	yes
TCGA-CJ-5679	wild-type	low RT	KDM4B	chr19	4969123	5153608	+
TCGA-CJ-5679	wild-type	low RT	KLF15	chr3	126061477	126076236	-
TCGA-CJ-5679	wild-type	low RT	KLHDC10	chr7	129710348	129775560	+
TCGA-CJ-5679	wild-type	low RT	LAMA1	chr18	6941742	7117813	-	LINC00668
TCGA-CJ-5679	wild-type	low RT	LOC730102	chr1	177975274	178007142	-	SEC16B	yes
TCGA-CJ-5679	wild-type	low RT	LRRK2	chr12	40618812	40763086	+	MUC19
TCGA-CJ-5679	wild-type	low RT	MMP7	chr11	102391238	102401478	-	TMEM123	no
TCGA-CJ-5679	wild-type	low RT	MPRIP	chr17	16946073	17095962	+
TCGA-CJ-5679	wild-type	low RT	MSL3P1	chr2	234774089	234777055	-	HJURP	yes
TCGA-CJ-5679	wild-type	low RT	MTMR12	chr5	32227110	32313114	-	GOLPH3	no
TCGA-CJ-5679	wild-type	low RT	NCOA1	chr2	24807345	24993570	+
TCGA-CJ-5679	wild-type	low RT	NDRG1	chr8	134249413	134309547	-
TCGA-CJ-5679	wild-type	low RT	NF2	chr22	29999544	30094589	+	CABP7	yes
TCGA-CJ-5679	wild-type	low RT	NRIP1	chr21	16333555	16438231	-	LOC388813
TCGA-CJ-5679	wild-type	low RT	NRSN2	chr20	327369	335512	+	TRIB3	yes
TCGA-CJ-5679	wild-type	low RT	NUDT12	chr5	102884555	102898502	-	LOC102467212
TCGA-CJ-5679	wild-type	low RT	NUP205	chr7	135242661	135333499	+	C7orf73
TCGA-CJ-5679	wild-type	low RT	PCGF5	chr10	92922768	93044088	+
TCGA-CJ-5679	wild-type	low RT	PLD6	chr17	17104308	17109646	-
TCGA-CJ-5679	wild-type	low RT	PNPT1	chr2	55861197	55921045	-	SMEK2	no
TCGA-CJ-5679	wild-type	low RT	PPIF	chr10	81107219	81115089	+
TCGA-CJ-5679	wild-type	low RT	PPP1CC	chr12	111157612	111180783	-	HVCN1	no
TCGA-CJ-5679	wild-type	low RT	PTGER4	chr5	40680031	40693837	+
TCGA-CJ-5679	wild-type	low RT	PTPN13	chr4	87515467	87736328	+
TCGA-CJ-5679	wild-type	low RT	PTTG1IP	chr21	46269499	46293818	-	SUMO3	no
TCGA-CJ-5679	wild-type	low RT	PXDC1	chr6	3722835	3752246	-	SLC22A23	no
TCGA-CJ-5679	wild-type	low RT	RHBDD2	chr7	75508316	75518244	+	POR	yes
TCGA-CJ-5679	wild-type	low RT	RHEB	chr7	151163097	151217010	-	CRYGN	yes
TCGA-CJ-5679	wild-type	low RT	RHOBTB3	chr5	95053336	95132071	+
TCGA-CJ-5679	wild-type	low RT	RND3	chr2	151324706	151344209	-
TCGA-CJ-5679	wild-type	low RT	RNF19A	chr8	101269286	101348446	-
TCGA-CJ-5679	wild-type	low RT	SAP130	chr2	128698790	128785633	-	AMMECR1L	no
TCGA-CJ-5679	wild-type	low RT	SELENBP1	chr1	151336777	151345210	-	RFX5	no
TCGA-CJ-5679	wild-type	low RT	SERPINB6	chr6	2948392	2972399	-	SERPINB9	no
TCGA-CJ-5679	wild-type	low RT	SHROOM1	chr5	132157832	132166590	-
TCGA-CJ-5679	wild-type	low RT	SIGMAR1	chr9	34634718	34637823	-	ARID3C	no
TCGA-CJ-5679	wild-type	low RT	SLC38A1	chr12	46576839	46663208	-	SCAF11
TCGA-CJ-5679	wild-type	low RT	SLC41A1	chr1	205758220	205782161	-	RAB29
TCGA-CJ-5679	wild-type	low RT	SMAD3	chr15	67358194	67487533	+
TCGA-CJ-5679	wild-type	low RT	SMO	chr7	128828712	128853385	+	AHCYL2	no
TCGA-CJ-5679	wild-type	low RT	SNAPC1	chr14	62229074	62263146	+	SYT16	no
TCGA-CJ-5679	wild-type	low RT	SNX12	chrX	70256097	70293276	-	SLC7A3	no
TCGA-CJ-5679	wild-type	low RT	SRM	chr1	11114648	11120091	-	MASP2	no
TCGA-CJ-5679	wild-type	low RT	SRSF4	chr1	29474249	29508637	-	TMEM200B	yes
TCGA-CJ-5679	wild-type	low RT	STK39	chr2	168810529	169104105	-
TCGA-CJ-5679	wild-type	low RT	TACC2	chr10	123748688	124014060	+	BTBD16	yes
TCGA-CJ-5679	wild-type	low RT	THUMPD2	chr2	39963199	40006416	-
TCGA-CJ-5679	wild-type	low RT	TMEM170A	chr16	75477141	75498584	-	CFDP1	yes
TCGA-CJ-5679	wild-type	low RT	TMTC4	chr13	101256089	101327189	-	GGACT
TCGA-CJ-5679	wild-type	low RT	TRA2A	chr7	23544400	23571660	-
TCGA-CJ-5679	wild-type	low RT	TRAF6	chr11	36505316	36531863	-
TCGA-CJ-5679	wild-type	low RT	TULP4	chr6	158733691	158932856	+	TMEM181	no
TCGA-CJ-5679	wild-type	low RT	UACA	chr15	70946892	71055850	-	TLE3	no
TCGA-CJ-5679	wild-type	low RT	UGGT2	chr13	96453835	96705736	-
TCGA-CJ-5679	wild-type	low RT	USP22	chr17	20902905	20946352	-
TCGA-CJ-5679	wild-type	low RT	VPS37D	chr7	73082173	73086440	+
TCGA-CJ-5679	wild-type	low RT	WDR36	chr5	110427869	110466200	+	CAMK4	no
TCGA-CJ-5679	wild-type	low RT	WWC3	chrX	9983794	10112518	+	CLCN4	yes
TCGA-CJ-5679	wild-type	low RT	XIAP	chrX	122993661	123047829	+	STAG2	no
TCGA-CJ-5679	wild-type	low RT	XPO1	chr2	61705068	61765418	-	USP34	no
TCGA-CJ-5679	wild-type	low RT	XPO7	chr8	21777179	21864096	+	NPM2	no
TCGA-CJ-5679	wild-type	low RT	XRN2	chr20	21283941	21370463	+
TCGA-CJ-5679	wild-type	low RT	XYLT2	chr17	48423392	48438546	+
TCGA-CJ-5679	wild-type	low RT	YTHDC2	chr5	112849390	112930984	+	KCNN2	no
TCGA-CJ-5679	wild-type	low RT	ZFYVE27	chr10	99496877	99520664	+
TCGA-CJ-5679	wild-type	low RT	ZKSCAN1	chr7	99613194	99639312	+	ZSCAN21	yes
TCGA-CJ-5679	wild-type	low RT	ZNF12	chr7	6728063	6746566	-
TCGA-CJ-5679	wild-type	low RT	ZNF286A	chr17	15602890	15624100	+	TBC1D26	no
TCGA-CJ-5679	wild-type	low RT	ZNF736	chr7	63774250	63817012	+	YWHAEP1
TCGA-CJ-5679	wild-type	low RT	ZNF805	chr19	57752052	57774106	+	ZNF460	no
TCGA-CJ-5677	wild-type	low RT	ACTR2	chr2	65454828	65498390	+
TCGA-CJ-5677	wild-type	low RT	ALPK2	chr18	56148481	56296189	-
TCGA-CJ-5677	wild-type	low RT	ARF4	chr3	57557089	57583215	-
TCGA-CJ-5677	wild-type	low RT	ARHGAP29	chr1	94615402	94740624	-	ABCA4	no
TCGA-CJ-5677	wild-type	low RT	ATOX1	chr5	151122382	151138210	-
TCGA-CJ-5677	wild-type	low RT	BCL7A	chr12	122459860	122499950	+	MLXIP	no
TCGA-CJ-5677	wild-type	low RT	BPTF	chr17	65821779	65980494	+
TCGA-CJ-5677	wild-type	low RT	BTF3	chr5	72794249	72801448	+
TCGA-CJ-5677	wild-type	low RT	C14orf79	chr14	105452615	105461855	+
TCGA-CJ-5677	wild-type	low RT	C19orf12	chr19	30189792	30206696	-
TCGA-CJ-5677	wild-type	low RT	CCDC132	chr7	92861652	92990435	+
TCGA-CJ-5677	wild-type	low RT	CD83	chr6	14117486	14137148	+
TCGA-CJ-5677	wild-type	low RT	CDC27	chr17	45195062	45266678	-	ARL17
TCGA-CJ-5677	wild-type	low RT	CDV3	chr3	133292433	133309118	+
TCGA-CJ-5677	wild-type	low RT	CNOT8	chr5	154237808	154256352	+
TCGA-CJ-5677	wild-type	low RT	CXCL14	chr5	134906370	134914969	-	NEUROG1
TCGA-CJ-5677	wild-type	low RT	DLL4	chr15	41221530	41231258	+	CHAC1	no
TCGA-CJ-5677	wild-type	low RT	DPY19L4	chr8	95732102	95806076	+	INTS8	yes
TCGA-CJ-5677	wild-type	low RT	EDN1	chr6	12290528	12297427	+
TCGA-CJ-5677	wild-type	low RT	EGR1	chr5	137801180	137805004	+
TCGA-CJ-5677	wild-type	low RT	EVA1C	chr21	33784744	33887710	+
TCGA-CJ-5677	wild-type	low RT	EXOSC10	chr1	11126675	11159938	-	SRM	yes
TCGA-CJ-5677	wild-type	low RT	FAT1	chr4	187508936	187644987	-	MTNR1A	no
TCGA-CJ-5677	wild-type	low RT	FBXO46	chr19	46213886	46234151	-
TCGA-CJ-5677	wild-type	low RT	FCHO2	chr5	72251807	72386349	+	TMEM171	no
TCGA-CJ-5677	wild-type	low RT	GATAD2A	chr19	19496641	19619741	+
TCGA-CJ-5677	wild-type	low RT	GNS	chr12	65107221	65153226	-
TCGA-CJ-5677	wild-type	low RT	GPT2	chr16	46918307	46965201	+
TCGA-CJ-5677	wild-type	low RT	GSPT1	chr16	11961984	12010519	-	RSL1D1	yes
TCGA-CJ-5677	wild-type	low RT	HAVCR2	chr5	156512842	156536248	-	HAVCR1	yes
TCGA-CJ-5677	wild-type	low RT	HBEGF	chr5	139712427	139726188	-	PFDN1	yes
TCGA-CJ-5677	wild-type	low RT	HLA-DMB_1	chr6	32902405	32908847	-
TCGA-CJ-5677	wild-type	low RT	IFT81	chr12	110562139	110656600	+	ATP2A2	no
TCGA-CJ-5677	wild-type	low RT	ING5	chr2	242641455	242668896	+	D2HGDH	no
TCGA-CJ-5677	wild-type	low RT	KCNJ8	chr12	21917888	21927755	-	LDHB	no
TCGA-CJ-5677	wild-type	low RT	KLF6	chr10	3818187	3827473	-	PITRM1	no
TCGA-CJ-5677	wild-type	low RT	KLHL29	chr2	23608297	23931483	+
TCGA-CJ-5677	wild-type	low RT	LAMC1	chr1	182992594	183114727	+	LAMC2	no
TCGA-CJ-5677	wild-type	low RT	LGALS3BP	chr17	76967334	76976061	-	TIMP2	no
TCGA-CJ-5677	wild-type	low RT	LOC284581	chr1	205831206	205865215	+
TCGA-CJ-5677	wild-type	low RT	LOC401320	chr7	30587972	30617395	-	GGCT	no
TCGA-CJ-5677	wild-type	low RT	LOC654342	chr2	91805187	91847975	-	IGKV3-11_2
TCGA-CJ-5677	wild-type	low RT	MYADM	chr19	54368837	54379689	+	PRKCG	no
TCGA-CJ-5677	wild-type	low RT	NDRG1	chr8	134249413	134309547	-
TCGA-CJ-5677	wild-type	low RT	NDST1	chr5	149877339	149937773	+	SYNPO	yes
TCGA-CJ-5677	wild-type	low RT	NFKB1	chr4	103422485	103538459	+
TCGA-CJ-5677	wild-type	low RT	OGDH	chr7	44646120	44748669	+	ZMIZ2	no
TCGA-CJ-5677	wild-type	low RT	PATL1	chr11	59404191	59436511	-	OSBP	no
TCGA-CJ-5677	wild-type	low RT	PRRC2C	chr1	171454665	171562650	+
TCGA-CJ-5677	wild-type	low RT	PTGER4	chr5	40680031	40693837	+
TCGA-CJ-5677	wild-type	low RT	PTTG1IP	chr21	46269499	46293818	-	SUMO3	yes
TCGA-CJ-5677	wild-type	low RT	RAB11FIP1	chr8	37716464	37757015	-	BRF2	no
TCGA-CJ-5677	wild-type	low RT	RASGEF1B	chr4	82347546	82393082	-	PRKG2	no
TCGA-CJ-5677	wild-type	low RT	RPGR	chrX	38128422	38186788	-	SRPX	no
TCGA-CJ-5677	wild-type	low RT	RPS9	chr19	54704725	54711515	+
TCGA-CJ-5677	wild-type	low RT	SIPA1L2	chr1	232533711	232651243	-
TCGA-CJ-5677	wild-type	low RT	SKI	chr1	2160133	2241652	+
TCGA-CJ-5677	wild-type	low RT	SKIL	chr3	170075472	170114637	+	CLDN11	no
TCGA-CJ-5677	wild-type	low RT	SLTM	chr15	59171243	59225852	-
TCGA-CJ-5677	wild-type	low RT	SOS1	chr2	39208689	39351486	-
TCGA-CJ-5677	wild-type	low RT	STAM2	chr2	152973314	153032506	-	CACNB4	no
TCGA-CJ-5677	wild-type	low RT	TMEM170A	chr16	75477141	75498584	-	CFDP1	yes
TCGA-CJ-5677	wild-type	low RT	TMEM67	chr8	94767071	94831460	+
TCGA-CJ-5677	wild-type	low RT	TRAF6	chr11	36505316	36531863	-
TCGA-CJ-5677	wild-type	low RT	UMPS	chr3	124449212	124468119	+
TCGA-CJ-5677	wild-type	low RT	WISP1	chr8	134203281	134243932	+
TCGA-CJ-5677	wild-type	low RT	YPEL5	chr2	30369749	30383399	+	LBH	yes
TCGA-CJ-5677	wild-type	low RT	YTHDC2	chr5	112849390	112930984	+	KCNN2	no
TCGA-CJ-5677	wild-type	low RT	ZFYVE27	chr10	99496877	99520664	+
TCGA-CJ-5677	wild-type	low RT	ZNF232	chr17	5008838	5026397	-
TCGA-CJ-5677	wild-type	low RT	ZNF626	chr19	20802744	20844402	-	ZNF737	no
TCGA-CJ-5677	wild-type	low RT	ZNF655	chr7	99156044	99174076	+	GS1-259H13.2
TCGA-CJ-5677	wild-type	low RT	ZNF805	chr19	57752052	57774106	+	ZNF460	no
TCGA-CZ-5987	wild-type	low RT	AHR	chr7	17338275	17385775	+	LOC102659288
TCGA-CZ-5987	wild-type	low RT	ALG13	chrX	110924345	111003875	+
TCGA-CZ-5987	wild-type	low RT	AMPD2	chr1	110162434	110174677	+	GSTM4	yes
TCGA-CZ-5987	wild-type	low RT	AMZ2P1	chr17	62962667	62971703	-	LRRC37A3_2	no
TCGA-CZ-5987	wild-type	low RT	ARL11	chr13	50202434	50208008	+
TCGA-CZ-5987	wild-type	low RT	ARMCX2	chrX	100910267	100914876	-
TCGA-CZ-5987	wild-type	low RT	BPTF	chr17	65821779	65980494	+
TCGA-CZ-5987	wild-type	low RT	C19orf12	chr19	30189792	30206696	-
TCGA-CZ-5987	wild-type	low RT	C2CD4A	chr15	62359175	62363116	+
TCGA-CZ-5987	wild-type	low RT	CBX4	chr17	77806954	77813213	-	CBX8	yes
TCGA-CZ-5987	wild-type	low RT	CCNG2	chr4	78078356	78091213	+	CXCL13	yes
TCGA-CZ-5987	wild-type	low RT	CD46	chr1	207925382	207968861	+
TCGA-CZ-5987	wild-type	low RT	CD47	chr3	107761940	107809935	-
TCGA-CZ-5987	wild-type	low RT	CDC16	chr13	115000361	115038150	+	UPF3A	no
TCGA-CZ-5987	wild-type	low RT	CDC27	chr17	45195062	45266678	-	ARL17
TCGA-CZ-5987	wild-type	low RT	CEP120	chr5	122680578	122759286	-
TCGA-CZ-5987	wild-type	low RT	CHAMP1	chr13	115079964	115092803	+
TCGA-CZ-5987	wild-type	low RT	CMTM6	chr3	32522803	32544403	-
TCGA-CZ-5987	wild-type	low RT	CNEP1R1	chr16	50059116	50070999	+	HEATR3	no
TCGA-CZ-5987	wild-type	low RT	CNOT8	chr5	154237808	154256352	+
TCGA-CZ-5987	wild-type	low RT	CUBN	chr10	16865964	17171816	-	RSU1	no
TCGA-CZ-5987	wild-type	low RT	CYTH4	chr22	37678494	37711389	+
TCGA-CZ-5987	wild-type	low RT	DFNA5	chr7	24737973	24797639	-
TCGA-CZ-5987	wild-type	low RT	DNAH5	chr5	13690436	13944589	-
TCGA-CZ-5987	wild-type	low RT	DYNC1I2	chr2	172543918	172606668	+
TCGA-CZ-5987	wild-type	low RT	DYNC2H1	chr11	102980159	103350591	+	MIR4693
TCGA-CZ-5987	wild-type	low RT	EDEM1	chr3	5229330	5261650	+
TCGA-CZ-5987	wild-type	low RT	EIF2S2	chr20	32676114	32700085	-
TCGA-CZ-5987	wild-type	low RT	ELMOD2	chr4	141445311	141474924	+
TCGA-CZ-5987	wild-type	low RT	EPG5	chr18	43427573	43547305	-
TCGA-CZ-5987	wild-type	low RT	EVA1C	chr21	33784744	33887710	+
TCGA-CZ-5987	wild-type	low RT	EXOSC10	chr1	11126675	11159938	-	SRM	yes
TCGA-CZ-5987	wild-type	low RT	FAM21C	chr10	46222647	46288412	+
TCGA-CZ-5987	wild-type	low RT	FCHO2	chr5	72251807	72386349	+	TMEM171	yes
TCGA-CZ-5987	wild-type	low RT	FKBP4	chr12	2904107	2914587	+	ITFG2	yes
TCGA-CZ-5987	wild-type	low RT	H6PD	chr1	9294862	9331394	+	SPSB1	yes
TCGA-CZ-5987	wild-type	low RT	HOOK1	chr1	60280462	60342050	+
TCGA-CZ-5987	wild-type	low RT	IFI16	chr1	158979681	159024945	+
TCGA-CZ-5987	wild-type	low RT	IREB2	chr15	78730517	78793798	+	HYKK
TCGA-CZ-5987	wild-type	low RT	ITGA6	chr2	173292313	173371181	+	PDK1	yes
TCGA-CZ-5987	wild-type	low RT	IVD	chr15	40697685	40713512	+	BAHD1	no
TCGA-CZ-5987	wild-type	low RT	JDP2	chr14	75894508	75939404	+	BATF	yes
TCGA-CZ-5987	wild-type	low RT	KIF12	chr9	116853917	116861337	-	AMBP	no
TCGA-CZ-5987	wild-type	low RT	LAP3	chr4	17578926	17609590	+	MED28	no
TCGA-CZ-5987	wild-type	low RT	LGALS3BP	chr17	76967334	76976061	-	TIMP2	no
TCGA-CZ-5987	wild-type	low RT	LINC00174	chr7	65841030	65865395	-
TCGA-CZ-5987	wild-type	low RT	LOC284581	chr1	205831206	205865215	+
TCGA-CZ-5987	wild-type	low RT	LOC730102	chr1	177975274	178007142	-	SEC16B	yes
TCGA-CZ-5987	wild-type	low RT	LRP2	chr2	169983618	170219122	-
TCGA-CZ-5987	wild-type	low RT	LRPPRC	chr2	44113362	44223144	-
TCGA-CZ-5987	wild-type	low RT	LRRK2	chr12	40618812	40763086	+	MUC19
TCGA-CZ-5987	wild-type	low RT	MAEA	chr4	1283638	1333936	+	UVSSA
TCGA-CZ-5987	wild-type	low RT	MMP7	chr11	102391238	102401478	-	TMEM123	no
TCGA-CZ-5987	wild-type	low RT	MRPS31P5	chr13	52741844	52768602	-	NEK3	no
TCGA-CZ-5987	wild-type	low RT	MTCH2	chr11	47638857	47664206	-	C1QTNF4	no
TCGA-CZ-5987	wild-type	low RT	NUDT12	chr5	102884555	102898502	-	LOC102467212
TCGA-CZ-5987	wild-type	low RT	PARD6B	chr20	49348080	49370278	+	BCAS4	no
TCGA-CZ-5987	wild-type	low RT	PDS5A	chr4	39824482	39979576	-
TCGA-CZ-5987	wild-type	low RT	PLCB2	chr15	40580097	40600174	-	ANKRD63
TCGA-CZ-5987	wild-type	low RT	PNPT1	chr2	55861197	55921045	-	SMEK2	no
TCGA-CZ-5987	wild-type	low RT	PSMB6	chr17	4699438	4701798	+	PLD2	no
TCGA-CZ-5987	wild-type	low RT	PTPRF	chr1	43996546	44089343	+	KDM4A	no
TCGA-CZ-5987	wild-type	low RT	RASGEF1B	chr4	82347546	82393082	-	PRKG2	no
TCGA-CZ-5987	wild-type	low RT	RFXAP	chr13	37393338	37403740	+
TCGA-CZ-5987	wild-type	low RT	SHROOM1	chr5	132157832	132166590	-
TCGA-CZ-5987	wild-type	low RT	SIGMAR1	chr9	34634718	34637823	-	ARID3C	no
TCGA-CZ-5987	wild-type	low RT	SLC1A5	chr19	47278139	47291842	-
TCGA-CZ-5987	wild-type	low RT	SLC45A4	chr8	142217264	142264728	-
TCGA-CZ-5987	wild-type	low RT	SLTM	chr15	59171243	59225852	-
TCGA-CZ-5987	wild-type	low RT	SNX12	chrX	70256097	70293276	-	SLC7A3	no
TCGA-CZ-5987	wild-type	low RT	SNX14	chr6	86215214	86303850	-
TCGA-CZ-5987	wild-type	low RT	TAGAP	chr6	159455500	159466184	-	RSPH3	no
TCGA-CZ-5987	wild-type	low RT	TMEM67	chr8	94767071	94831460	+
TCGA-CZ-5987	wild-type	low RT	TMX1	chr14	51706885	51724372	+	LINC00640
TCGA-CZ-5987	wild-type	low RT	TNS3	chr7	47314751	47621742	-	IGFBP3	yes
TCGA-CZ-5987	wild-type	low RT	TOPBP1	chr3	133319448	133380737	-
TCGA-CZ-5987	wild-type	low RT	TPP2	chr13	103249285	103331523	+
TCGA-CZ-5987	wild-type	low RT	TRPM7	chr15	50849351	50979012	-	USP50	no
TCGA-CZ-5987	wild-type	low RT	TSN	chr2	122513120	122525428	+	CNTNAP5	no
TCGA-CZ-5987	wild-type	low RT	TUBA1A	chr12	49578577	49583107	-	TUBA1B	yes
TCGA-CZ-5987	wild-type	low RT	UBE2J2	chr1	1189291	1209234	-	FAM132A	yes
TCGA-CZ-5987	wild-type	low RT	UFM1	chr13	38923907	38937144	+	LINC00366
TCGA-CZ-5987	wild-type	low RT	UGGT2	chr13	96453835	96705736	-
TCGA-CZ-5987	wild-type	low RT	VPS4B	chr18	61056424	61089752	-	KDSR	no
TCGA-CZ-5987	wild-type	low RT	WDR36	chr5	110427869	110466200	+	CAMK4	no
TCGA-CZ-5987	wild-type	low RT	WDR60	chr7	158649268	158738883	+	LINC00689
TCGA-CZ-5987	wild-type	low RT	XPO1	chr2	61705068	61765418	-	USP34	no
TCGA-CZ-5987	wild-type	low RT	XPO7	chr8	21777179	21864096	+	NPM2	no
TCGA-CZ-5987	wild-type	low RT	YPEL5	chr2	30369749	30383399	+	LBH	no
TCGA-CZ-5987	wild-type	low RT	ZFYVE27	chr10	99496877	99520664	+
TCGA-CZ-5987	wild-type	low RT	ZNF137P	chr19	53099936	53103405	+
TCGA-CZ-5987	wild-type	low RT	ZNF334	chr20	45128268	45142198	-	MKRN7P
TCGA-CZ-5987	wild-type	low RT	ZNF688	chr16	30581018	30583728	-	ZNF764	yes
TCGA-CZ-5987	wild-type	low RT	ZNF689	chr16	30613878	30622096	-	ZNF785	yes
TCGA-CZ-5987	wild-type	low RT	ZNF805	chr19	57752052	57774106	+	ZNF460	no
TCGA-CZ-5984	wild-type	low RT	ABCC9	chr12	21950323	22089628	-	KCNJ8	no
TCGA-CZ-5984	wild-type	low RT	AGT	chr1	230838271	230850336	-
TCGA-CZ-5984	wild-type	low RT	AKR1B1	chr7	134127106	134143888	-	SLC35B4	no
TCGA-CZ-5984	wild-type	low RT	ANKRD46	chr8	101521979	101572014	-
TCGA-CZ-5984	wild-type	low RT	ARFGAP3	chr22	43192531	43253408	-	CS330190
TCGA-CZ-5984	wild-type	low RT	ARHGEF19	chr1	16524598	16539104	-	EPHA2	yes
TCGA-CZ-5984	wild-type	low RT	ARID5A	chr2	97202463	97218371	+
TCGA-CZ-5984	wild-type	low RT	ASB13	chr10	5680819	5708558	-
TCGA-CZ-5984	wild-type	low RT	ATP5G1	chr17	46970147	46973232	+	UBE2Z	no
TCGA-CZ-5984	wild-type	low RT	ATP6V1H	chr8	54628102	54755871	-	OPRK1	no
TCGA-CZ-5984	wild-type	low RT	BCL7A	chr12	122459860	122499950	+	MLXIP	no
TCGA-CZ-5984	wild-type	low RT	BTBD3	chr20	11871370	11907243	+
TCGA-CZ-5984	wild-type	low RT	BUD13	chr11	116618885	116643714	-	LINC00900
TCGA-CZ-5984	wild-type	low RT	C11orf24	chr11	68028802	68039469	-	SUV420H1	no
TCGA-CZ-5984	wild-type	low RT	C19orf12	chr19	30189792	30206696	-
TCGA-CZ-5984	wild-type	low RT	CBX4	chr17	77806954	77813213	-	CBX8	no
TCGA-CZ-5984	wild-type	low RT	CBX7	chr22	39526778	39548538	-
TCGA-CZ-5984	wild-type	low RT	CCNG2	chr4	78078356	78091213	+	CXCL13	yes
TCGA-CZ-5984	wild-type	low RT	CD209	chr19	7804880	7812464	-	CLEC4G	no
TCGA-CZ-5984	wild-type	low RT	CDC27	chr17	45195062	45266678	-	ARL17
TCGA-CZ-5984	wild-type	low RT	CDK14	chr7	90095737	90839905	+	FZD1	yes
TCGA-CZ-5984	wild-type	low RT	CDK5RAP3	chr17	46047893	46059152	+
TCGA-CZ-5984	wild-type	low RT	CDS1	chr4	85504056	85572493	+
TCGA-CZ-5984	wild-type	low RT	CENPV	chr17	16245847	16256812	-
TCGA-CZ-5984	wild-type	low RT	CLDN18	chr3	137717657	137752494	+
TCGA-CZ-5984	wild-type	low RT	CLEC2B	chr12	10004967	10022458	-
TCGA-CZ-5984	wild-type	low RT	CNIH4	chr1	224544512	224567153	+
TCGA-CZ-5984	wild-type	low RT	CNOT8	chr5	154237808	154256352	+
TCGA-CZ-5984	wild-type	low RT	COL15A1	chr9	101705994	101833074	+	TGFBR1	no
TCGA-CZ-5984	wild-type	low RT	COL16A1	chr1	32117847	32169768	-	PEF1	no
TCGA-CZ-5984	wild-type	low RT	CUBN	chr10	16865964	17171816	-	RSU1	no
TCGA-CZ-5984	wild-type	low RT	DDX60	chr4	169137441	169239958	-
TCGA-CZ-5984	wild-type	low RT	DFNA5	chr7	24737973	24797639	-
TCGA-CZ-5984	wild-type	low RT	DHX35	chr20	37590980	37668366	+
TCGA-CZ-5984	wild-type	low RT	DNMT1	chr19	10244021	10305755	-	EIF3G	no
TCGA-CZ-5984	wild-type	low RT	DOHH	chr19	3490818	3500938	-	SMIM24
TCGA-CZ-5984	wild-type	low RT	DPEP2	chr16	68021292	68034489	-	DPEP3	yes
TCGA-CZ-5984	wild-type	low RT	EBAG9	chr8	110551928	110578225	+
TCGA-CZ-5984	wild-type	low RT	EFNB2	chr13	107142078	107187388	-
TCGA-CZ-5984	wild-type	low RT	ELK4	chr1	205577070	205602000	-
TCGA-CZ-5984	wild-type	low RT	ELMOD2	chr4	141445311	141474924	+
TCGA-CZ-5984	wild-type	low RT	EPB41L5	chr2	120770603	120936697	+
TCGA-CZ-5984	wild-type	low RT	EXOC3L4	chr14	103566480	103576894	+	TNFAIP2	yes
TCGA-CZ-5984	wild-type	low RT	FAM171A1	chr10	15253643	15413058	-	NMT2	yes
TCGA-CZ-5984	wild-type	low RT	FAM193A	chr4	2627158	2734302	+
TCGA-CZ-5984	wild-type	low RT	FHL3	chr1	38462441	38471187	-	SF3A3	no
TCGA-CZ-5984	wild-type	low RT	GATAD2A	chr19	19496641	19619741	+
TCGA-CZ-5984	wild-type	low RT	GEMIN8	chrX	14024844	14048035	-	GPM6B	no
TCGA-CZ-5984	wild-type	low RT	GPX7	chr1	53068042	53074723	+	FAM159A	yes
TCGA-CZ-5984	wild-type	low RT	HLA-DMB_1	chr6	32902405	32908847	-
TCGA-CZ-5984	wild-type	low RT	HOOK1	chr1	60280462	60342050	+
TCGA-CZ-5984	wild-type	low RT	HPCAL1	chr2	10443029	10567743	+
TCGA-CZ-5984	wild-type	low RT	HSPA8	chr11	122928199	122933186	-
TCGA-CZ-5984	wild-type	low RT	IFI16	chr1	158979681	159024945	+
TCGA-CZ-5984	wild-type	low RT	ING5	chr2	242641455	242668896	+	D2HGDH	no
TCGA-CZ-5984	wild-type	low RT	IPO8	chr12	30781914	30848929	-	TMTC1	no
TCGA-CZ-5984	wild-type	low RT	ITGA6	chr2	173292313	173371181	+	PDK1	yes
TCGA-CZ-5984	wild-type	low RT	KAT6A	chr8	41786996	41909505	-	ANK1	yes
TCGA-CZ-5984	wild-type	low RT	KDSR	chr18	60994970	61034506	-	BCL2	yes
TCGA-CZ-5984	wild-type	low RT	KIAA1429	chr8	95500004	95565746	-	RAD54B	yes
TCGA-CZ-5984	wild-type	low RT	KIAA2013	chr1	11979644	11986485	-	NPPB	yes
TCGA-CZ-5984	wild-type	low RT	KIF3A	chr5	132028318	132073270	-
TCGA-CZ-5984	wild-type	low RT	KLHL24	chr3	183353410	183402304	+	YEATS2	yes
TCGA-CZ-5984	wild-type	low RT	LAMA1	chr18	6941742	7117813	-	LINC00668
TCGA-CZ-5984	wild-type	low RT	LAMC1	chr1	182992594	183114727	+	LAMC2	yes
TCGA-CZ-5984	wild-type	low RT	LAP3	chr4	17578926	17609590	+	MED28	no
TCGA-CZ-5984	wild-type	low RT	LAPTM4A	chr2	20232410	20251789	-	MATN3	yes
TCGA-CZ-5984	wild-type	low RT	LGALS3BP	chr17	76967334	76976061	-	TIMP2	no
TCGA-CZ-5984	wild-type	low RT	LOC654342	chr2	91805187	91847975	-	IGKV3-11_2
TCGA-CZ-5984	wild-type	low RT	MAB21L3	chr1	116654375	116677861	+	ATP1A1	no
TCGA-CZ-5984	wild-type	low RT	MAP3K8	chr10	30722949	30750762	+
TCGA-CZ-5984	wild-type	low RT	MAPK9	chr5	179660594	179719071	-	RASGEF1C	yes
TCGA-CZ-5984	wild-type	low RT	MAPRE3	chr2	27193524	27250087	+	TMEM214	yes
TCGA-CZ-5984	wild-type	low RT	MARK3	chr14	103851700	103970166	+
TCGA-CZ-5984	wild-type	low RT	MBNL2	chr13	97874549	98046374	+	RAP2A	no
TCGA-CZ-5984	wild-type	low RT	MLF2	chr12	6857157	6862636	-
TCGA-CZ-5984	wild-type	low RT	MPRIP	chr17	16946073	17095962	+
TCGA-CZ-5984	wild-type	low RT	MR1	chr1	181002560	181031074	+	IER5	yes
TCGA-CZ-5984	wild-type	low RT	MRAS	chr3	138066489	138124377	+	ESYT3	no
TCGA-CZ-5984	wild-type	low RT	MYADM	chr19	54368837	54379689	+	PRKCG	no
TCGA-CZ-5984	wild-type	low RT	NACA	chr12	57106210	57119326	-	PTGES3	no
TCGA-CZ-5984	wild-type	low RT	NEIL2	chr8	11627171	11644854	+	FDFT1	no
TCGA-CZ-5984	wild-type	low RT	NFIC	chr19	3359560	3469215	+
TCGA-CZ-5984	wild-type	low RT	NFIL3	chr9	94171326	94186908	-	AUH	no
TCGA-CZ-5984	wild-type	low RT	NLRC5	chr16	57050985	57117436	+	CPNE2	no
TCGA-CZ-5984	wild-type	low RT	NMUR1	chr2	232387870	232395182	-	LINC00471
TCGA-CZ-5984	wild-type	low RT	NUP205	chr7	135242661	135333499	+	C7orf73
TCGA-CZ-5984	wild-type	low RT	OAT	chr10	126085871	126107545	-	CHST15	yes
TCGA-CZ-5984	wild-type	low RT	PARP1	chr1	226548391	226595801	-	LIN9	no
TCGA-CZ-5984	wild-type	low RT	PCNX	chr14	71374121	71582099	+	SNORD56B
TCGA-CZ-5984	wild-type	low RT	PDP2	chr16	66914382	66925002	+
TCGA-CZ-5984	wild-type	low RT	PIFO	chr1	111889181	111895639	+
TCGA-CZ-5984	wild-type	low RT	PLD6	chr17	17104308	17109646	-
TCGA-CZ-5984	wild-type	low RT	PMVK	chr1	154897207	154909484	-	KCNN3	no
TCGA-CZ-5984	wild-type	low RT	POU6F1	chr12	51580718	51611477	-	TFCP2	no
TCGA-CZ-5984	wild-type	low RT	PPARD	chr6	35310334	35395968	+	FANCE	no
TCGA-CZ-5984	wild-type	low RT	PRR14	chr16	30662240	30667734	+	FBRS	no
TCGA-CZ-5984	wild-type	low RT	PTGS1	chr9	125132808	125157982	+	OR1J2	yes
TCGA-CZ-5984	wild-type	low RT	PTPN12	chr7	77166772	77269388	+
TCGA-CZ-5984	wild-type	low RT	PTPN13	chr4	87515467	87736328	+
TCGA-CZ-5984	wild-type	low RT	PTTG1IP	chr21	46269499	46293818	-	SUMO3	no
TCGA-CZ-5984	wild-type	low RT	RABAC1	chr19	42460832	42463528	-
TCGA-CZ-5984	wild-type	low RT	RARS	chr5	167913462	167946309	+	FBLL1	no
TCGA-CZ-5984	wild-type	low RT	RBM17	chr10	6130948	6159422	+	PFKFB3	yes
TCGA-CZ-5984	wild-type	low RT	RHOBTB3	chr5	95053336	95132071	+
TCGA-CZ-5984	wild-type	low RT	RLF	chr1	40627040	40706593	+	TMCO2	no
TCGA-CZ-5984	wild-type	low RT	RPS19BP1	chr22	39925097	39928860	-
TCGA-CZ-5984	wild-type	low RT	SAP130	chr2	128698790	128785633	-	AMMECR1L	no
TCGA-CZ-5984	wild-type	low RT	SDK1	chr7	3341079	4308631	+	FOXK1	no
TCGA-CZ-5984	wild-type	low RT	SERTAD1	chr19	40928408	40931932	-	PRX	no
TCGA-CZ-5984	wild-type	low RT	SET	chr9	131445933	131458675	+	PKN3	no
TCGA-CZ-5984	wild-type	low RT	SIPA1L2	chr1	232533711	232651243	-
TCGA-CZ-5984	wild-type	low RT	SLC16A14	chr2	230899689	230933715	-
TCGA-CZ-5984	wild-type	low RT	SLC25A42	chr19	19174802	19223841	+
TCGA-CZ-5984	wild-type	low RT	SNX29	chr16	12070601	12668146	+
TCGA-CZ-5984	wild-type	low RT	SP100	chr2	231280870	231410317	+
TCGA-CZ-5984	wild-type	low RT	SPINT2	chr19	38755097	38783254	+
TCGA-CZ-5984	wild-type	low RT	STC1	chr8	23699433	23712320	-	NKX2-6	no
TCGA-CZ-5984	wild-type	low RT	SUB1	chr5	32585604	32604185	+	NPR3	no
TCGA-CZ-5984	wild-type	low RT	TACC2	chr10	123748688	124014060	+	BTBD16	yes
TCGA-CZ-5984	wild-type	low RT	TMEM173	chr5	138855112	138862343	-	ECSCR	yes
TCGA-CZ-5984	wild-type	low RT	TMEM67	chr8	94767071	94831460	+
TCGA-CZ-5984	wild-type	low RT	TNRC6A	chr16	24741048	24837547	+	SLC5A11	no
TCGA-CZ-5984	wild-type	low RT	TRAF6	chr11	36505316	36531863	-
TCGA-CZ-5984	wild-type	low RT	TRIM16	chr17	15531279	15586193	-	CDRT1	yes
TCGA-CZ-5984	wild-type	low RT	TRPS1	chr8	116420723	116681255	-	CSMD3	no
TCGA-CZ-5984	wild-type	low RT	TSPAN12	chr7	120427373	120498177	-
TCGA-CZ-5984	wild-type	low RT	TSPAN9	chr12	3186520	3395730	+	PRMT8	no
TCGA-CZ-5984	wild-type	low RT	UACA	chr15	70946892	71055850	-	TLE3	no
TCGA-CZ-5984	wild-type	low RT	UBR1	chr15	43235097	43398286	-	TTBK2	no
TCGA-CZ-5984	wild-type	low RT	UGGT2	chr13	96453835	96705736	-
TCGA-CZ-5984	wild-type	low RT	USO1	chr4	76649705	76735442	+
TCGA-CZ-5984	wild-type	low RT	USP31	chr16	23072727	23160591	-
TCGA-CZ-5984	wild-type	low RT	UTP23	chr8	117778741	117786921	+
TCGA-CZ-5984	wild-type	low RT	VPS4B	chr18	61056424	61089752	-	KDSR	yes
TCGA-CZ-5984	wild-type	low RT	WDFY1	chr2	224740064	224810052	-	AP1S3	yes
TCGA-CZ-5984	wild-type	low RT	WDR60	chr7	158649268	158738883	+	LINC00689
TCGA-CZ-5984	wild-type	low RT	WISP1	chr8	134203281	134243932	+
TCGA-CZ-5984	wild-type	low RT	WRB	chr21	40752212	40769815	+
TCGA-CZ-5984	wild-type	low RT	XPO1	chr2	61705068	61765418	-	USP34	no
TCGA-CZ-5984	wild-type	low RT	ZC3H7B	chr22	41697506	41756151	+	TEF	no
TCGA-CZ-5984	wild-type	low RT	ZDBF2	chr2	207139364	207179150	+	ADAM23	no
TCGA-CZ-5984	wild-type	low RT	ZFP69	chr1	40943301	40962015	+	EXO5
TCGA-CZ-5984	wild-type	low RT	ZFYVE27	chr10	99496877	99520664	+
TCGA-CZ-5984	wild-type	low RT	ZHX2	chr8	123793900	123986755	+
TCGA-CZ-5984	wild-type	low RT	ZKSCAN1	chr7	99613194	99639312	+	ZSCAN21	no
TCGA-CZ-5984	wild-type	low RT	ZMYM2	chr13	20532809	20665984	+
TCGA-CZ-5984	wild-type	low RT	ZNF185	chrX	152082985	152142025	+
TCGA-CZ-5984	wild-type	low RT	ZNF202	chr11	123594996	123612363	-	SCN3B	yes
TCGA-CZ-5984	wild-type	low RT	ZNF24	chr18	32912177	32924426	-
TCGA-CZ-5984	wild-type	low RT	ZNF251	chr8	145946293	145980970	-	ARHGAP39	no
TCGA-CZ-5984	wild-type	low RT	ZNF264	chr19	57702867	57734214	+	AURKC	no
TCGA-CZ-5984	wild-type	low RT	ZNF33B	chr10	43084554	43133992	-	ZNF37BP
TCGA-CZ-5984	wild-type	low RT	ZNF354A	chr5	178138521	178157703	-	CLK4	yes
TCGA-CZ-5984	wild-type	low RT	ZNF362	chr1	33722173	33766320	+
TCGA-CZ-5984	wild-type	low RT	ZNF43	chr19	21987750	22034870	-	ZNF100	no
TCGA-CZ-5984	wild-type	low RT	ZNF599	chr19	35248978	35264134	-
TCGA-CZ-5984	wild-type	low RT	ZNF671	chr19	58231118	58238995	-	ZNF154	no
TCGA-CZ-5984	wild-type	low RT	ZNF688	chr16	30581018	30583728	-	ZNF764	no
TCGA-CZ-5984	wild-type	low RT	ZSCAN9	chr6	28193028	28201264	+
TCGA-CZ-5984	wild-type	low RT	ZYG11B	chr1	53192130	53293013	+	ZYG11A	no
TCGA-CZ-5453	wild-type	high RT	ABCD4	chr14	74751979	74769767	-
TCGA-CZ-5453	wild-type	high RT	ABCF2	chr7	150904922	150924460	-	IQCA1L
TCGA-CZ-5453	wild-type	high RT	ACACB	chr12	109577201	109706030	+
TCGA-CZ-5453	wild-type	high RT	ACTB	chr7	5566778	5570232	-	FBXL18	no
TCGA-CZ-5453	wild-type	high RT	ACVR1B	chr12	52345450	52390863	+	GRASP	yes
TCGA-CZ-5453	wild-type	high RT	ADAMTSL5	chr19	1505016	1513188	-
TCGA-CZ-5453	wild-type	high RT	AES	chr19	3052907	3062964	-	TLE2	no
TCGA-CZ-5453	wild-type	high RT	AGL	chr1	100315639	100389579	+	SLC35A3	no
TCGA-CZ-5453	wild-type	high RT	AHCTF1	chr1	247002401	247094726	-
TCGA-CZ-5453	wild-type	high RT	AKAP11	chr13	42846288	42897403	+	TNFSF11	no
TCGA-CZ-5453	wild-type	high RT	AKR1E2	chr10	4868368	4890251	+
TCGA-CZ-5453	wild-type	high RT	ALAD	chr9	116148591	116163618	-	HDHD3	no
TCGA-CZ-5453	wild-type	high RT	ALAS1	chr3	52232098	52248343	+
TCGA-CZ-5453	wild-type	high RT	ALDH18A1	chr10	97365685	97416567	-	SORBS1	no
TCGA-CZ-5453	wild-type	high RT	ALDH1B1	chr9	38392660	38398662	+
TCGA-CZ-5453	wild-type	high RT	ALDH5A1	chr6	24495196	24537435	+
TCGA-CZ-5453	wild-type	high RT	ALG10B	chr12	38710556	38723528	+
TCGA-CZ-5453	wild-type	high RT	ALS2CL	chr3	46710484	46735194	-
TCGA-CZ-5453	wild-type	high RT	AMPD2	chr1	110162434	110174677	+	GSTM4	no
TCGA-CZ-5453	wild-type	high RT	AMZ2P1	chr17	62962667	62971703	-	LRRC37A3_2	no
TCGA-CZ-5453	wild-type	high RT	ANAPC1_2	chr2	112525213	112641741	-	MIR4435-1HG
TCGA-CZ-5453	wild-type	high RT	ANAPC4	chr4	25378847	25420120	+	SLC34A2	no
TCGA-CZ-5453	wild-type	high RT	ANAPC5	chr12	121746047	121792012	-	CAMKK2	no
TCGA-CZ-5453	wild-type	high RT	ANKRD10	chr13	111530886	111567454	-	LINC00346
TCGA-CZ-5453	wild-type	high RT	ANP32E	chr1	150190716	150208504	-
TCGA-CZ-5453	wild-type	high RT	AP2B1	chr17	33914281	34053436	+	RASL10B	no
TCGA-CZ-5453	wild-type	high RT	AP2S1	chr19	47341414	47354252	-	SNAR-E
TCGA-CZ-5453	wild-type	high RT	APOL4	chr22	36585175	36600879	-	APOL3	no
TCGA-CZ-5453	wild-type	high RT	AQP3	chr9	33441151	33447631	-	AQP7	no
TCGA-CZ-5453	wild-type	high RT	AQP6	chr12	50366619	50370922	+
TCGA-CZ-5453	wild-type	high RT	ARC	chr8	143692404	143695833	-
TCGA-CZ-5453	wild-type	high RT	ARF4	chr3	57557089	57583215	-
TCGA-CZ-5453	wild-type	high RT	ARF6	chr14	50359735	50363772	+	MIR6076
TCGA-CZ-5453	wild-type	high RT	ARHGAP23	chr17	36584719	36668628	+
TCGA-CZ-5453	wild-type	high RT	ARHGEF10L	chr1	17846826	18024370	+	ACTL8	no
TCGA-CZ-5453	wild-type	high RT	ARHGEF19	chr1	16524598	16539104	-	EPHA2	yes
TCGA-CZ-5453	wild-type	high RT	ARL4D	chr17	41476352	41478504	+	MIR2117
TCGA-CZ-5453	wild-type	high RT	ARMCX1	chrX	100805513	100809675	+
TCGA-CZ-5453	wild-type	high RT	ARMCX2	chrX	100910267	100914876	-
TCGA-CZ-5453	wild-type	high RT	ARMCX6	chrX	100870107	100872991	-
TCGA-CZ-5453	wild-type	high RT	ARPP19	chr15	52839431	52861364	-	MYO5A	no
TCGA-CZ-5453	wild-type	high RT	ARSA	chr22	51061181	51066601	-
TCGA-CZ-5453	wild-type	high RT	ASNS	chr7	97481428	97501854	-
TCGA-CZ-5453	wild-type	high RT	ASRGL1	chr11	62104773	62160887	+	SCGB1A1	no
TCGA-CZ-5453	wild-type	high RT	ATAD2B	chr2	23971533	24149984	-
TCGA-CZ-5453	wild-type	high RT	ATP11C	chrX	138808504	138914447	-	MCF2	no
TCGA-CZ-5453	wild-type	high RT	ATP2A3	chr17	3827162	3867758	-	P2RX1	no
TCGA-CZ-5453	wild-type	high RT	ATP5G1	chr17	46970147	46973232	+	UBE2Z	no
TCGA-CZ-5453	wild-type	high RT	ATP5G2	chr12	54058943	54070512	-	ATF7	no
TCGA-CZ-5453	wild-type	high RT	ATP6V1H	chr8	54628102	54755871	-	OPRK1	no
TCGA-CZ-5453	wild-type	high RT	ATRN	chr20	3451664	3631769	+
TCGA-CZ-5453	wild-type	high RT	B3GNT7	chr2	232260334	232265875	+
TCGA-CZ-5453	wild-type	high RT	BAG3	chr10	121410881	121437329	+	INPP5F	no
TCGA-CZ-5453	wild-type	high RT	BCAM	chr19	45312315	45324678	+	PVRL2	no
TCGA-CZ-5453	wild-type	high RT	BCL2L10	chr15	52401821	52404972	-
TCGA-CZ-5453	wild-type	high RT	BCL7A	chr12	122459860	122499950	+	MLXIP	no
TCGA-CZ-5453	wild-type	high RT	BCLAF1	chr6	136578000	136610989	-	MTFR2
TCGA-CZ-5453	wild-type	high RT	BEX4	chrX	102470019	102472128	+
TCGA-CZ-5453	wild-type	high RT	BIRC2	chr11	102217912	102249401	+
TCGA-CZ-5453	wild-type	high RT	BLOC1S6	chr15	45879416	45901909	+	SQRDL	yes
TCGA-CZ-5453	wild-type	high RT	BMF	chr15	40380090	40401085	-
TCGA-CZ-5453	wild-type	high RT	BMPR2	chr2	203241049	203432474	+	FAM117B	no
TCGA-CZ-5453	wild-type	high RT	BMS1	chr10	43277953	43330385	+	MIR5100
TCGA-CZ-5453	wild-type	high RT	BNIP3L	chr8	26240522	26270644	+
TCGA-CZ-5453	wild-type	high RT	BPTF	chr17	65821779	65980494	+
TCGA-CZ-5453	wild-type	high RT	BSG	chr19	571276	583493	+	HCN2	no
TCGA-CZ-5453	wild-type	high RT	BST2	chr19	17513747	17516457	-	PLVAP	yes
TCGA-CZ-5453	wild-type	high RT	BTN3A1	chr6	26402464	26415444	+	BTN2A3P
TCGA-CZ-5453	wild-type	high RT	C10orf88	chr10	124690418	124713919	-
TCGA-CZ-5453	wild-type	high RT	C14orf79	chr14	105452615	105461855	+
TCGA-CZ-5453	wild-type	high RT	C19orf12	chr19	30189792	30206696	-
TCGA-CZ-5453	wild-type	high RT	C1orf216	chr1	36179476	36184790	-	PSMB2	yes
TCGA-CZ-5453	wild-type	high RT	C1orf52	chr1	85715636	85725355	-	SYDE2	no
TCGA-CZ-5453	wild-type	high RT	C20orf96	chr20	251503	271419	-
TCGA-CZ-5453	wild-type	high RT	C2CD2	chr21	43305218	43373999	-	PRDM15	no
TCGA-CZ-5453	wild-type	high RT	C2CD4A	chr15	62359175	62363116	+
TCGA-CZ-5453	wild-type	high RT	C2CD5	chr12	22601479	22697480	-	ST8SIA1	no
TCGA-CZ-5453	wild-type	high RT	C5orf24	chr5	134181369	134195425	+	TXNDC15	no
TCGA-CZ-5453	wild-type	high RT	CALCA	chr11	14988214	14993832	-	CYP2R1	yes
TCGA-CZ-5453	wild-type	high RT	CALD1	chr7	134464163	134655480	+	AGBL3	yes
TCGA-CZ-5453	wild-type	high RT	CALM1	chr14	90863326	90874619	+	LINC00642
TCGA-CZ-5453	wild-type	high RT	CAMK2N1	chr1	20808883	20812728	-	LINC01141
TCGA-CZ-5453	wild-type	high RT	CAMLG	chr5	134074169	134087850	+	DDX46	no
TCGA-CZ-5453	wild-type	high RT	CAPRIN2	chr12	30862485	30907448	-	IPO8	no
TCGA-CZ-5453	wild-type	high RT	CARS	chr11	3022151	3078681	-	NAP1L4	no
TCGA-CZ-5453	wild-type	high RT	CASC4	chr15	44580908	44707959	+	CTDSPL2	no
TCGA-CZ-5453	wild-type	high RT	CBX4	chr17	77806954	77813213	-	CBX8	no
TCGA-CZ-5453	wild-type	high RT	CBX7	chr22	39526778	39548538	-
TCGA-CZ-5453	wild-type	high RT	CBY3	chr5	179105558	179107975	-	C5orf60	yes
TCGA-CZ-5453	wild-type	high RT	CCDC132	chr7	92861652	92990435	+
TCGA-CZ-5453	wild-type	high RT	CCDC14	chr3	123632273	123680255	-	MYLK	no
TCGA-CZ-5453	wild-type	high RT	CCDC93	chr2	118673053	118771739	-
TCGA-CZ-5453	wild-type	high RT	CCL11	chr17	32612686	32615199	+	CCL8	no
TCGA-CZ-5453	wild-type	high RT	CCL8	chr17	32646065	32648421	+	CCL13	no
TCGA-CZ-5453	wild-type	high RT	CCNG2	chr4	78078356	78091213	+	CXCL13	no
TCGA-CZ-5453	wild-type	high RT	CCT4	chr2	62095261	62115806	-	FAM161A	no
TCGA-CZ-5453	wild-type	high RT	CD164	chr6	109687716	109703762	-
TCGA-CZ-5453	wild-type	high RT	CD276	chr15	73976621	74006859	+
TCGA-CZ-5453	wild-type	high RT	CD2AP	chr6	47445524	47594996	+	GPR111	no
TCGA-CZ-5453	wild-type	high RT	CD300LG	chr17	41924515	41940997	+
TCGA-CZ-5453	wild-type	high RT	CD40	chr20	44746905	44758384	+
TCGA-CZ-5453	wild-type	high RT	CD46	chr1	207925382	207968861	+
TCGA-CZ-5453	wild-type	high RT	CD47	chr3	107761940	107809935	-
TCGA-CZ-5453	wild-type	high RT	CDC42	chr1	22379119	22419436	+
TCGA-CZ-5453	wild-type	high RT	CDK5RAP2	chr9	123151146	123342448	-	TRNA_67
TCGA-CZ-5453	wild-type	high RT	CDK5RAP3	chr17	46047893	46059152	+
TCGA-CZ-5453	wild-type	high RT	CDKL2	chr4	76501703	76555721	-
TCGA-CZ-5453	wild-type	high RT	CEP170B	chr14	105331649	105363107	+	PLD4	yes
TCGA-CZ-5453	wild-type	high RT	CEP350	chr1	179923907	180084015	+	QSOX1	no
TCGA-CZ-5453	wild-type	high RT	CFDP1	chr16	75327607	75467387	-	BCAR1	yes
TCGA-CZ-5453	wild-type	high RT	CHAMP1	chr13	115079964	115092803	+
TCGA-CZ-5453	wild-type	high RT	CHD1L	chr1	146714290	146767447	+
TCGA-CZ-5453	wild-type	high RT	CHGB	chr20	5891973	5906005	+
TCGA-CZ-5453	wild-type	high RT	CKB	chr14	103985994	103989196	-
TCGA-CZ-5453	wild-type	high RT	CLEC2D	chr12	9822303	9852151	+
TCGA-CZ-5453	wild-type	high RT	CLK1	chr2	201717731	201729467	-
TCGA-CZ-5453	wild-type	high RT	CLPTM1	chr19	45457841	45496604	+	RELB	yes
TCGA-CZ-5453	wild-type	high RT	CNEP1R1	chr16	50059116	50070999	+	HEATR3	no
TCGA-CZ-5453	wild-type	high RT	CNOT10	chr3	32726636	32815367	+	TRIM71	yes
TCGA-CZ-5453	wild-type	high RT	CNOT8	chr5	154237808	154256352	+
TCGA-CZ-5453	wild-type	high RT	COL12A1	chr6	75794041	75915623	-
TCGA-CZ-5453	wild-type	high RT	COL1A2	chr7	94023872	94060544	+	CASD1	no
TCGA-CZ-5453	wild-type	high RT	COL6A1	chr21	47401662	47424963	+	COL6A2	yes
TCGA-CZ-5453	wild-type	high RT	COL6A3	chr2	238232654	238322850	-
TCGA-CZ-5453	wild-type	high RT	COPS4	chr4	83956238	83996971	+
TCGA-CZ-5453	wild-type	high RT	COX19	chr7	1004485	1015235	-	ADAP1	no
TCGA-CZ-5453	wild-type	high RT	CPD	chr17	28705941	28796675	+	GOSR1	no
TCGA-CZ-5453	wild-type	high RT	CREB3L1	chr11	46299188	46342972	+	DGKZ	yes
TCGA-CZ-5453	wild-type	high RT	CREM	chr10	35415768	35501886	+	CCNY	no
TCGA-CZ-5453	wild-type	high RT	CSF1	chr1	110453232	110473616	+	AHCYL1	no
TCGA-CZ-5453	wild-type	high RT	CSRP1	chr1	201452657	201476387	-	PHLDA3	yes
[truncated: 14,515 more rows]

## Sheet: B
GeneName	Nr_MutatedSamples	Nr_HighRTSamples	Nr_LowRTSamples	BiologicalProcess
SETX	2	1	1	Transcription Termination
PAPOLA	1	1	0	Transcription Termination
CPSF3	2	1	1	Transcription Termination
PCF11	1	0	1	Transcription Termination
U2AF2	1	0	1	Both
RBM8A	2	1	1	Both
MED18	1	1	0	Transcription Termination
CNOT1	1	0	1	mRNA Processing
RBM11	1	0	1	mRNA Processing
HSPA8	1	0	1	mRNA Processing
SRRM4	1	0	1	mRNA Processing
TNRC6C	1	1	0	mRNA Processing
RBMX	2	2	0	mRNA Processing
TOB1	1	1	0	mRNA Processing
TNRC6B	1	0	1	mRNA Processing
EIF2C2	3	2	1	mRNA Processing
IWS1	1	0	1	mRNA Processing
PAF1	1	0	1	mRNA Processing
DAZAP1	1	0	1	mRNA Processing
PRPF19	1	1	0	mRNA Processing
TIA1	1	0	1	mRNA Processing
THRAP3	1	0	1	mRNA Processing
DDX5	1	0	1	mRNA Processing
CELF3	1	0	1	mRNA Processing
CELF4	2	0	2	mRNA Processing
RBM25	1	1	0	mRNA Processing
TRA2B	2	0	2	mRNA Processing
SNW1	1	0	1	mRNA Processing
EIF4A3	1	1	0	mRNA Processing
ACIN1	1	1	0	mRNA Processing
CTR9	1	0	1	mRNA Processing
NAB2	1	0	1	mRNA Processing
PABPC1	1	1	0	mRNA Processing
CELF6	1	1	0	mRNA Processing
BARD1	1	1	0	mRNA Processing
SUPT5H	1	0	1	mRNA Processing
CPSF4	1	0	1	mRNA Processing
SRPK2	1	0	1	mRNA Processing

## Sheet: C
SampleName	geneName	Chrom	lxStart	lxEnd	Strand	Downstream_Tandem_Gene	Expression_Interfered
AB	AACS	chr12	125549924	125627871	+	TMEM132B	no
AB	ABCD4	chr14	74751979	74769767	-
AB	ABCF2	chr7	150904922	150924460	-	IQCA1L	no
AB	ABHD2	chr15	89631380	89745591	+
AB	ABLIM3	chr5	148521045	148640001	+	AFAP1L1	no
AB	ACSL4	chrX	108884563	108976621	-	KCNE1L	no
AB	ADAMTS3	chr4	73146685	73434516	-
AB	AGPAT3	chr21	45285115	45407475	+	TRAPPC10	no
AB	AHCTF1	chr1	247002401	247094726	-
AB	AHDC1	chr1	27860755	27930005	-	WASF2	no
AB	AHR	chr7	17338275	17385775	+	LOC102659288	no
AB	ALAS1	chr3	52232098	52248343	+
AB	ALG10B	chr12	38710556	38723528	+
AB	ALS2CL	chr3	46710484	46735194	-
AB	ANKRD36BP2	chr2	89065418	89106109	+	MIR4436A	no
AB	ANKRD46	chr8	101521979	101572014	-
AB	AP2B1	chr17	33914281	34053436	+	RASL10B	yes
AB	APOL6	chr22	36044423	36064456	+	APOL5	yes
AB	ARF6	chr14	50359735	50363772	+	MIR6076	no
AB	ARHGEF10L	chr1	17846826	18024370	+	ACTL8	no
AB	ARSD	chrX	2822010	2847416	-
AB	ASB13	chr10	5680819	5708558	-
AB	ATP9B	chr18	76829396	77138282	+	NFATC1	yes
AB	ATRN	chr20	3451664	3631769	+
AB	AUH	chr9	93976096	94124206	-	LOC100129316	no
AB	B4GALT6	chr18	29202208	29264686	-
AB	BARX1	chr9	96713908	96717608	-
AB	BCL7B	chr7	72950682	72972065	-	BAZ1B	no
AB	BCORL1	chrX	129139163	129192058	+
AB	BIRC2	chr11	102217912	102249401	+
AB	BLOC1S6	chr15	45879416	45901909	+	SQRDL	no
AB	BMS1	chr10	43277953	43330385	+	MIR5100	no
AB	BTBD11	chr12	107712196	108053419	+	PWP1	no
AB	BTRC	chr10	103113789	103317078	+
AB	C10orf88	chr10	124690418	124713919	-
AB	C11orf24	chr11	68028802	68039469	-	SUV420H1	yes
AB	C14orf2	chr14	104378624	104387903	-
AB	C17orf97	chr17	260117	264457	+
AB	C19orf12	chr19	30189792	30206696	-
AB	C2CD2	chr21	43305218	43373999	-	PRDM15	no
AB	C2orf27A	chr2	132480063	132524977	+
AB	C2orf27B	chr2	132552533	132559234	-
AB	C3orf58	chr3	143690639	143711210	+
AB	C5orf24	chr5	134181369	134195425	+	TXNDC15	no
AB	C5orf30	chr5	102594441	102614361	+
AB	C9orf89	chr9	95858449	95875565	+
AB	CALD1	chr7	134464163	134655480	+	AGBL3	no
AB	CAMK2D	chr4	114372187	114683083	-
AB	CAMK2N1	chr1	20808883	20812728	-	LINC01141	no
AB	CAMSAP1	chr9	138700332	138799005	-
AB	CAPRIN2	chr12	30862485	30907448	-	IPO8	no
AB	CASC4	chr15	44580908	44707959	+	CTDSPL2	no
AB	CASP8AP2	chr6	90539618	90584155	+	GJA10	no
AB	CBFB	chr16	67063049	67134958	+	C16orf70	no
AB	CBX7	chr22	39526778	39548538	-
AB	CCDC117	chr22	29168661	29185289	+
AB	CCDC132	chr7	92861652	92990435	+
AB	CD276	chr15	73976621	74006859	+
AB	CD83	chr6	14117486	14137148	+
AB	CDC25A	chr3	48198667	48229801	-	MAP4	no
AB	CDK14	chr7	90095737	90839905	+	FZD1	no
AB	CEP170B	chr14	105331649	105363107	+	PLD4	no
AB	CEP350	chr1	179923907	180084015	+	QSOX1	no
AB	CHD1L	chr1	146714290	146767447	+
AB	CLEC2D	chr12	9822303	9852151	+
AB	CLPTM1	chr19	45457841	45496604	+	RELB	no
AB	CNOT8	chr5	154237808	154256352	+
AB	CNTLN	chr9	17134988	17503921	+	SH3GL2	yes
AB	COL16A1	chr1	32117847	32169768	-	PEF1	no
AB	COPS4	chr4	83956238	83996971	+
AB	COTL1	chr16	84599203	84651702	-	TLDC1	no
AB	COX7A2	chr6	75947390	75953644	-	COL12A1	yes
AB	CPEB4	chr5	173315330	173387313	+	C5orf47	yes
AB	CREB5	chr7	28338939	28865511	+
AB	CSRP2	chr12	77252494	77272820	-
AB	CTNNBIP1	chr1	9908333	9970316	-	CLSTN1	no
AB	CYCS	chr7	25158269	25164980	-	OSBPL3	no
AB	DAW1	chr2	228736326	228789026	+
AB	DBT	chr1	100652477	100715409	-	LRRC39	yes
AB	DDX3X	chrX	41192650	41209524	+	NYX	yes
AB	DDX46	chr5	134094423	134166826	+	C5orf24	no
AB	DDX6	chr11	118618472	118661972	-	TREH	yes
AB	DFNB31	chr9	117164359	117267736	-	AKNA	no
AB	DHX9	chr1	182808438	182857117	+
AB	DNAH5	chr5	13690436	13944589	-
AB	DNAJA2	chr16	46989273	47007625	-
AB	DUSP12	chr1	161719580	161726952	+	ATF6	yes
AB	DYNC2H1	chr11	102980159	103350591	+	MIR4693	no
AB	EBAG9	chr8	110551928	110578225	+
AB	EDN1	chr6	12290528	12297427	+
AB	EFR3A	chr8	132916355	133025886	+
AB	EIF4G3	chr1	21132784	21503381	-	HP1BP3	no
AB	ELAVL1	chr19	8023456	8070529	-	TIMM44	no
AB	ELL2	chr5	95220801	95297775	-
AB	ENAH	chr1	225674533	225840845	-	LBR	no
AB	EPB41L5	chr2	120770603	120936697	+
AB	EPS15	chr1	51819934	51984995	-	TTC39A	yes
AB	EPS15L1	chr19	16466054	16582823	-
AB	ETF1	chr5	137841781	137878989	-
AB	FAF2	chr5	175875355	175937075	+
AB	FAM101B	chr17	289770	295731	-
AB	FAM109A	chr12	111798454	111806925	-
AB	FAM46A	chr6	82455446	82462428	-
AB	FAM73B	chr9	131798922	131834351	+	DOLPP1	no
AB	FAM84B	chr8	127564682	127570711	-
AB	FAM91A1	chr8	124780881	124827690	+	FER1L6	yes
AB	FAR1	chr11	13690205	13753893	+	SPON1	no
AB	FBXL12	chr19	9920942	9929731	-	ZNF846	no
AB	FBXL17	chr5	107194733	107717799	-	EFNA5	no
AB	FBXO28	chr1	224301788	224349749	+	DEGS1	no
AB	FCHO2	chr5	72251807	72386349	+	TMEM171	yes
AB	FERMT1	chr20	6055491	6104191	-	LRRN4	no
AB	FGFBP3	chr10	93666344	93669258	-
AB	FGFRL1	chr4	1005609	1020686	+
AB	FNTA	chr8	42911441	42940932	+	SGK196	yes
AB	GABARAPL1	chr12	10365488	10375724	+	KLRD1	yes
AB	GADD45A	chr1	68150859	68154021	+
AB	GADD45B	chr19	2476122	2478257	+
AB	GALNT12	chr9	101569980	101612363	+	COL15A1	no
AB	GFPT2	chr5	179727699	179780315	-	MAPK9	no
AB	GKAP1	chr9	86354335	86444431	-
AB	GLIS1	chr1	53971905	54199877	-
AB	GMEB2	chr20	62218954	62258381	-	HELZ2	no
AB	GNA11	chr19	3094407	3124000	+	GNA15	no
AB	GOLGA4	chr3	37284681	37408370	+	C3orf35	no
AB	GORAB	chr1	170501262	170522974	+	PRRX1	no
AB	GPCPD1	chr20	5525079	5591672	-	LOC101929207	no
AB	GPHN	chr14	66974124	67648525	+	FAM71D	no
AB	GPT2	chr16	46918307	46965201	+
AB	GTF2IRD2_2	chr7	74210482	74267872	-
AB	HERC2P9	chr15	28899587	28930410	+
AB	HES1	chr3	193853930	193856401	+
AB	HGSNAT	chr8	42995591	43057970	+	POTEA	no
AB	HIC2	chr22	21771692	21805750	+	TMEM191C	no
AB	HMOX1	chr22	35777059	35790207	+	MCM5	no
AB	HOOK1	chr1	60280462	60342050	+
AB	HRNR	chr1	152184551	152196672	-	RPTN	yes
AB	HSD17B4	chr5	118788137	118878030	+	FAM170A	yes
AB	HSPH1	chr13	31709110	31736525	-
AB	IFNGR1	chr6	137518620	137540567	-	IL22RA2	no
AB	IFNLR1	chr1	24480646	24513765	-	IL22RA1	no
AB	IFT52	chr20	42219578	42275862	+	MYBL2	no
AB	IGBP1	chrX	69353317	69386173	+	DGAT2L6	yes
AB	IL7R	chr5	35856976	35879705	+
AB	INPP1	chr2	191208195	191236391	+	MFSD6	no
AB	IPO8	chr12	30781914	30848929	-	TMTC1	no
AB	IQGAP1	chr15	90931472	91045475	+	CRTC3	no
AB	ISOC2	chr19	55964345	55973049	-	SHISA7	yes
AB	ITGAV	chr2	187454789	187545629	+	FAM171B	no
AB	ITM2C	chr2	231729312	231743969	+	LOC151484	no
AB	IVD	chr15	40697685	40713512	+	BAHD1	no
AB	KIF21A	chr12	39687029	39837192	-	CPNE8	no
AB	KLHDC10	chr7	129710348	129775560	+
AB	KRT80	chr12	52562779	52585784	-
AB	KY	chr3	134318764	134369864	-
AB	LAMP2	chrX	119560002	119603204	-
AB	LAPTM4A	chr2	20232410	20251789	-	MATN3	yes
AB	LCLAT1	chr2	30670122	30867091	+
AB	LEMD2	chr6	33738989	33756906	-	IP6K3	yes
AB	LGMN	chr14	93170151	93215047	-
AB	LHFPL1	chrX	111873878	111923375	-
AB	LMNB1	chr5	126112314	126172712	+
AB	LMO3	chr12	16701305	16761148	-
AB	LOC730102	chr1	177975274	178007142	-	SEC16B	yes
AB	LRCH1	chr13	47127295	47327175	+
AB	LRP5	chr11	68080076	68216743	+	PPP6R3	no
AB	MAN2A2	chr15	91446565	91465815	+	UNC45A	no
AB	MAP2K3	chr17	21187967	21218551	+	KCNJ12	yes
AB	MAP2K5	chr15	67835020	68099455	+	SKOR1	yes
AB	MAP3K7	chr6	91223291	91297020	-
AB	MAPK13	chr6	36098260	36112301	+	BRPF3	no
AB	MAPK9	chr5	179660594	179719071	-	RASGEF1C	yes
AB	MBIP	chr14	36767763	36789882	-	PTCSC3	no
AB	MCM2	chr3	127317199	127341278	+	PODXL2	yes
AB	MED10	chr5	6372038	6378639	-	FLJ33360	yes
AB	MED15	chr22	20861828	20941919	+	POM121L4P	no
AB	MEX3D	chr19	1554667	1568057	-
AB	MFSD5	chr12	53645369	53648190	+	ESPL1	no
AB	MKNK2	chr19	2037469	2051243	-	BTBD2	no
AB	MRFAP1L1	chr4	6709428	6711606	-
AB	MRPL11	chr11	66202545	66206319	-
AB	MRPL23	chr11	1968501	1977839	+
AB	MTDH	chr8	98656406	98742488	+	LAPTM4B	no
AB	MTFR2	chr6	136552167	136571449	-
AB	MTM1	chrX	149737046	149841616	+	MTMR1	no
AB	MYBL1	chr8	67474409	67525484	-
AB	MYLK2	chr20	30407177	30422500	+
AB	MYSM1	chr1	59120410	59165747	-	TACSTD2	yes
AB	NACC2	chr9	138898382	138987131	-	UBAC1	no
AB	NAMPT	chr7	105888731	105925638	-	SYPL1	no
AB	NBAS	chr2	15307031	15701472	-
AB	NCAPH	chr2	97001478	97042833	+
AB	NDUFA4	chr7	10971579	10979813	-
AB	NECAP1	chr12	8234806	8250373	+	CLEC4A	no
AB	NEK1	chr4	170314420	170533778	-	SH3RF1	no
AB	NEUROG2	chr4	113434671	113437328	-
AB	NFU1	chr2	69623244	69664760	-	GFPT1	no
AB	NGDN	chr14	23938897	23947402	+	THTPA	yes
AB	NIN	chr14	51186480	51297839	-	SAV1	yes
AB	NIPA1	chr15	23043278	23086843	-	NIPA2	no
AB	NLK	chr17	26369687	26523404	+	PYY2	yes
AB	NLRC5	chr16	57050985	57117436	+	CPNE2	no
AB	NMI	chr2	152126981	152146430	-	RBM43	yes
AB	OLA1	chr2	174937174	175113365	-	SP3	no
AB	OLFML2B	chr1	161952981	161994255	-
AB	PAEP	chr9	138453603	138458622	+	LOC100130954	no
AB	PAPD5	chr16	50186828	50269219	+	ADCY7	no
AB	PARP14	chr3	122399671	122449687	+
AB	PARP16	chr15	65550436	65579018	-	CILP	yes
AB	PCGF5	chr10	92922768	93044088	+
AB	PDIK1L	chr1	26437655	26452039	+	FAM110D	no
AB	PERP	chr6	138409641	138428660	-
AB	PEX5	chr12	7341758	7371169	+	ACSM4	no
AB	PIGK	chr1	77554666	77685132	-
AB	PIK3C2A	chr11	17108123	17191354	-	RPS13	no
AB	PLD2	chr17	4710395	4726727	+	MINK1	no
AB	PLXNA1	chr3	126707436	126756235	+	C3orf56	no
AB	PMEPA1	chr20	56223447	56286592	-	ZBP1	no
AB	POLD3	chr11	74303574	74354105	+
AB	PPA2	chr4	106290233	106395227	-
AB	PPARG	chr3	12328983	12475855	+	TSEN2	no
AB	PRDX4	chrX	23685644	23704514	+
AB	PRPF19	chr11	60658019	60674061	-
AB	PRPSAP2	chr17	18759611	18834599	+	SLC5A10	yes
AB	PSMB6	chr17	4699438	4701798	+	PLD2	no
AB	PTAR1	chr9	72324437	72374876	-	APBA1	yes
AB	PTGER4	chr5	40680031	40693837	+
AB	PTP4A2	chr1	32372021	32403988	-	SPOCD1	no
AB	PTPRK	chr6	128289923	128841870	-	THEMIS	no
AB	QSER1	chr11	32914723	33014862	+	DEPDC7	yes
AB	RAB6A	chr11	73386682	73472201	-
AB	RASA3	chr13	114747193	114898095	-	LINC00565	no
AB	RBBP6	chr16	24550907	24584183	+
AB	RCBTB2	chr13	49063098	49110118	-
AB	RCC2	chr1	17733250	17766250	-
AB	REEP3	chr10	65281122	65384883	+	ANXA2P3	no
AB	REST	chr4	57774041	57802010	+
AB	RIOK2	chr5	96496570	96519005	-	LIX1	yes
AB	RNF111	chr15	59279864	59389618	+	CCNB2	no
AB	RNF38	chr9	36336398	36401195	-	GNE	no
AB	RNF44	chr5	175953699	175964421	-
AB	RNF6	chr13	26786904	26796508	-	SHISA2	no
AB	RP9	chr7	33134409	33149002	-	NT5C3A	no
AB	RPGR	chrX	38128422	38186788	-	SRPX	no
AB	SBNO1	chr12	123773655	123834988	-	CDK2AP1	no
AB	SDC1	chr2	20400557	20425194	-	LAPTM4A	no
AB	SDC3	chr1	31342312	31381480	-	LAPTM5	no
AB	SEC24A	chr5	133984474	134063601	+	CAMLG	no
AB	SEL1L3	chr4	25749048	25865217	-
AB	SENP6	chr6	76311621	76427994	+	MYO6	no
AB	SERTAD1	chr19	40928408	40931932	-	PRX	yes
AB	SFSWAP	chr12	132195631	132284283	+	MMP17	no
AB	SH3TC1	chr4	8201059	8242830	+	HTRA3	no
AB	SHH	chr7	155592735	155604967	-
AB	SLC15A4	chr12	129277738	129308541	-
AB	SLC25A14	chrX	129473861	129507335	+
AB	SLC38A2	chr12	46751970	46766645	-	SLC38A1	no
AB	SLC41A1	chr1	205758220	205782161	-	RAB29	no
AB	SLC45A1	chr1	8378144	8404227	+
AB	SLC4A4	chr4	72053002	72437804	+
AB	SLC9A1	chr1	27425299	27481621	-	FAM46B	yes
AB	SLC9A8	chr20	48429249	48508779	+
AB	SLITRK4	chrX	142710594	142723926	-	SPANXN3	no
AB	SMAP2	chr1	40839377	40888998	+	ZFP69B	no
AB	SMARCA2	chr9	2015218	2193623	+
AB	SMYD3	chr1	245912641	246670644	-
AB	SNRNP70	chr19	49588396	49611870	+	LIN7B	no
AB	SNRPE	chr1	203830726	203840280	+
AB	SNX29	chr16	12070601	12668146	+
AB	SNX4	chr3	125165487	125239058	-	ZNF148	no
AB	SOS1	chr2	39208689	39351486	-
AB	SP1	chr12	53773978	53810226	+	AMHR2	no
AB	SPAG9	chr17	49039534	49198226	-
AB	SPARCL1	chr4	88394481	88450655	-
AB	SPRY1	chr4	124317949	124324915	+
AB	SQRDL	chr15	45923345	45983492	+	SEMA6D	no
AB	SRP9	chr1	225965514	225978168	+	EPHX1	yes
AB	SSR2	chr1	155978838	155990758	-	ARHGEF2	yes
AB	STAG2	chrX	123094409	123236505	+	SH2D1A	no
AB	STK11IP	chr2	220462595	220481173	+	SLC4A3	yes
AB	STK35	chr20	2082527	2129198	+	LOC388780	no
AB	STX2	chr12	131274144	131323819	-	RIMBP2	no
AB	TAF15	chr17	34136458	34174246	+
AB	TBC1D13	chr9	131549485	131572711	+	ENDOG	no
AB	TCEANC	chrX	13671224	13683527	+	RAB9A	no
AB	TFAP2C	chr20	55204357	55214338	+
AB	TFDP1	chr13	114239002	114295788	+
AB	TFE3	chrX	48886237	48901043	-	GRIPAP1	yes
AB	THUMPD1	chr16	20744985	20753199	-	ACSM1	yes
AB	TINAG	chr6	54173202	54254950	+	FAM83B	no
AB	TINAGL1	chr1	32042085	32053287	+	HCRTR1	yes
AB	TIPRL	chr1	168148082	168171351	+	TBX19	yes
AB	TMEM144	chr4	159131400	159176439	+	RXFP1	no
AB	TMEM170A	chr16	75477141	75498584	-	CFDP1	yes
AB	TMEM41B	chr11	9302200	9336315	-
AB	TMPRSS11D	chr4	68686593	68749716	-	GNRHR	no
AB	TMTC4	chr13	101256089	101327189	-	GGACT	no
AB	TOMM7	chr7	22852250	22862471	-
AB	TOP2A	chr17	38544772	38574202	-	GJD3	yes
AB	TRIM36	chr5	114460458	114516243	-
AB	TRIM47	chr17	73870244	73874656	-	WBP2	yes
AB	TRIM9	chr14	51441980	51562422	-	PYGL	no
AB	TRPS1	chr8	116420723	116681255	-	CSMD3	no
AB	TUBA1B	chr12	49521566	49525304	-	LMBR1L	yes
AB	TXN	chr9	113006091	113018920	-	C9orf152	no
AB	UBE2I	chr16	1359153	1377019	+	BAIAP3	no
AB	UBE2W	chr8	74692331	74791145	-	STAU2	no
AB	UBR1	chr15	43235097	43398286	-	TTBK2	yes
AB	UPF2	chr10	11962020	12085169	-	PROSER2-AS1	no
AB	USP10	chr16	84733554	84813527	+	CRISPLD2	yes
AB	USP22	chr17	20902905	20946352	-
AB	USP31	chr16	23072727	23160591	-
AB	UTP14A	chrX	129040096	129063738	+	BCORL1	yes
AB	VAPA	chr18	9913954	9960018	+
AB	VAPB	chr20	56964174	57026156	+
AB	VEGFA	chr6	43737945	43754223	+	LOC100132354	no
AB	VHL	chr3	10183318	10195354	+	IRAK2	no
AB	VSIG1	chrX	107288199	107322414	+
AB	VWA1	chr1	1370902	1378262	+	ATAD3C	no
AB	WBP5	chrX	102611379	102613397	+	NGFRAP1	yes
AB	WDR45B	chr17	80572437	80606411	-
AB	WNT7B	chr22	46316247	46373008	-
AB	YAE1D1	chr7	39605974	39651688	+	RALA	no
AB	YPEL5	chr2	30369749	30383399	+	LBH	yes
AB	YTHDC1_1	chr4	69176104	69215824	-	TMPRSS11B	no
AB	YTHDF1	chr20	61826781	61847538	-
AB	ZBTB38	chr3	141043054	141168632	+	RASA2	no
AB	ZC3H7A	chr16	11844441	11891114	-	TXNDC11	no
AB	ZFP1	chr16	75182420	75206132	+
AB	ZFP36L1	chr14	69254371	69262960	-
AB	ZFR	chr5	32354455	32444844	-	MTMR12	no
AB	ZHX2	chr8	123793900	123986755	+
AB	ZNF12	chr7	6728063	6746566	-
AB	ZNF2	chr2	95831161	95850064	+	PROM2	no
AB	ZNF25	chr10	38238794	38265453	-	ZNF248	no
AB	ZNF260	chr19	37001588	37019248	-
AB	ZNF346	chr5	176449696	176508190	+	FGFR4	no
AB	ZNF592	chr15	85291817	85349663	+	ALPK3	no
AB	ZNF608	chr5	123972609	124084500	-
AB	ZW10	chr11	113603904	113644485	-	TMPRSS5	no
Caki1	AHDC1	chr1	27860755	27930005	-	WASF2	no
Caki1	ALAS1	chr3	52232098	52248343	+
Caki1	ATP9B	chr18	76829396	77138282	+	NFATC1	yes
Caki1	AUH	chr9	93976096	94124206	-	LOC100129316	no
Caki1	BCL7B	chr7	72950682	72972065	-	BAZ1B	no
Caki1	BCORL1	chrX	129139163	129192058	+
Caki1	BPGM	chr7	134331530	134364567	+	CALD1	no
Caki1	C11orf24	chr11	68028802	68039469	-	SUV420H1	no
Caki1	C12orf5	chr12	4430358	4469190	+
Caki1	C19orf12	chr19	30189792	30206696	-
Caki1	C1GALT1	chr7	7222245	7288280	+	LOC101927354	no
Caki1	C1orf52	chr1	85715636	85725355	-	SYDE2	no
Caki1	CARS	chr11	3022151	3078681	-	NAP1L4	no
Caki1	CCDC117	chr22	29168661	29185289	+
Caki1	CCDC132	chr7	92861652	92990435	+
Caki1	CCSER2	chr10	86088344	86278277	+
Caki1	CHD1L	chr1	146714290	146767447	+
Caki1	CNOT8	chr5	154237808	154256352	+
Caki1	COPS4	chr4	83956238	83996971	+
Caki1	COX7A2	chr6	75947390	75953644	-	COL12A1	yes
Caki1	CPEB4	chr5	173315330	173387313	+	C5orf47	no
Caki1	CREBBP	chr16	3775055	3930121	-	TRAP1	no
Caki1	CYCS	chr7	25158269	25164980	-	OSBPL3	no
Caki1	DAD1	chr14	23033806	23058143	-	AK125397	no
Caki1	DDX46	chr5	134094423	134166826	+	C5orf24	no
Caki1	DFNB31	chr9	117164359	117267736	-	AKNA	yes
Caki1	DUSP12	chr1	161719580	161726952	+	ATF6	no
Caki1	EBAG9	chr8	110551928	110578225	+
Caki1	EPAS1	chr2	46524540	46613842	+	LOC101805491	no
Caki1	ETF1	chr5	137841781	137878989	-
Caki1	FAM35BP	chr10	46897640	46939145	+
Caki1	FAM35DP	chr10	47379719	47421238	+
Caki1	FAM91A1	chr8	124780881	124827690	+	FER1L6	yes
Caki1	FAR1	chr11	13690205	13753893	+	SPON1	no
Caki1	FAXC	chr6	99720792	99797531	-	FBXL4	no
Caki1	FBXL12	chr19	9920942	9929731	-	ZNF846	yes
Caki1	FBXO28	chr1	224301788	224349749	+	DEGS1	yes
Caki1	FERMT1	chr20	6055491	6104191	-	LRRN4	no
Caki1	FNTA	chr8	42911441	42940932	+	SGK196	no
Caki1	GABARAPL1	chr12	10365488	10375724	+	KLRD1	no
Caki1	GALNT12	chr9	101569980	101612363	+	COL15A1	no
Caki1	GEM	chr8	95261484	95274547	-	CDH17	yes
Caki1	GLIPR2	chr9	36136532	36163910	+	CCIN	yes
Caki1	GLTSCR1	chr19	48111452	48206534	+	EHD2	yes
Caki1	GPT2	chr16	46918307	46965201	+
Caki1	GUCY1B3	chr4	156680124	156728794	+
Caki1	HES1	chr3	193853930	193856401	+
Caki1	IL4R	chr16	27325229	27376099	+	IL21R	no
Caki1	IL7R	chr5	35856976	35879705	+
Caki1	IPO8	chr12	30781914	30848929	-	TMTC1	no
Caki1	IPW	chr15	25361691	25367623	+	PWAR1	no
Caki1	KIAA1429	chr8	95500004	95565746	-	RAD54B	no
Caki1	KRT80	chr12	52562779	52585784	-
Caki1	KY	chr3	134318764	134369864	-
Caki1	LAMP2	chrX	119560002	119603204	-
Caki1	LAPTM4A	chr2	20232410	20251789	-	MATN3	yes
Caki1	LEPREL1	chr3	189674516	189840226	-
Caki1	LGMN	chr14	93170151	93215047	-
Caki1	LMO3	chr12	16701305	16761148	-
Caki1	LOC100507537	chr3	155008020	155011489	-
Caki1	LOC730102	chr1	177975274	178007142	-	SEC16B	no
Caki1	LRRC27	chr10	134145613	134195010	+	PWWP2B	yes
Caki1	LURAP1L	chr9	12775011	12823059	+
Caki1	MAN2A2	chr15	91446565	91465815	+	UNC45A	no
Caki1	MAP3K1	chr5	56110899	56191978	+	SETD9	no
Caki1	MAP3K8	chr10	30722949	30750762	+
Caki1	MAPK13	chr6	36098260	36112301	+	BRPF3	no
Caki1	MAPK9	chr5	179660594	179719071	-	RASGEF1C	no
Caki1	MBNL2	chr13	97874549	98046374	+	RAP2A	no
Caki1	MGLL	chr3	127407904	127542093	-
Caki1	MOSPD1	chrX	134021661	134049297	-
Caki1	NDRG1	chr8	134249413	134309547	-
Caki1	NLK	chr17	26369687	26523404	+	PYY2	yes
Caki1	NUP210	chr3	13357729	13461819	-	IQSEC1	no
Caki1	OLFML2B	chr1	161952981	161994255	-
Caki1	PAPD5	chr16	50186828	50269219	+	ADCY7	no
Caki1	PCM1	chr8	17780365	17887457	+
Caki1	PCMTD2	chr20	62887047	62907579	+	LINC00266-1	no
Caki1	PIK3C2A	chr11	17108123	17191354	-	RPS13	no
Caki1	PKDCC	chr2	42275160	42285668	+
Caki1	PLXNA1	chr3	126707436	126756235	+	C3orf56	no
Caki1	PPA2	chr4	106290233	106395227	-
Caki1	PPAPDC3	chr9	134165080	134184649	+	PRRC2B	no
Caki1	PPARG	chr3	12328983	12475855	+	TSEN2	no
Caki1	PSD3	chr8	18384812	18871196	-
Caki1	PTP4A2	chr1	32372021	32403988	-	SPOCD1	no
Caki1	PTPN11	chr12	112856535	112947717	+	RPH3A	no
Caki1	PTPRE	chr10	129705324	129884164	+
Caki1	RAB11FIP1	chr8	37716464	37757015	-	BRF2	yes
Caki1	RGS2	chr1	192778168	192781407	+
Caki1	RNF111	chr15	59279864	59389618	+	CCNB2	no
Caki1	SAE1	chr19	47634079	47713893	+
Caki1	SHQ1	chr3	72798427	72897598	-	RYBP	no
Caki1	SIRT4	chr12	120740123	120751045	+
Caki1	SLC39A11	chr17	70642084	71088853	-	LINC00511	no
Caki1	SLC4A4	chr4	72053002	72437804	+
Caki1	SMO	chr7	128828712	128853385	+	AHCYL2	no
Caki1	SNRNP70	chr19	49588396	49611870	+	LIN7B	no
Caki1	SNX3	chr6	108532420	108582464	-
Caki1	SOD3	chr4	24797084	24802467	+
Caki1	SP1	chr12	53773978	53810226	+	AMHR2	yes
Caki1	SPRY1	chr4	124317949	124324915	+
Caki1	SPTLC2	chr14	77972339	78083110	-	ISM2	no
Caki1	SQRDL	chr15	45923345	45983492	+	SEMA6D	no
Caki1	SREK1	chr5	65440045	65479444	+
Caki1	SSR2	chr1	155978838	155990758	-	ARHGEF2	yes
Caki1	STAG2	chrX	123094409	123236505	+	SH2D1A	no
Caki1	TAF15	chr17	34136458	34174246	+
Caki1	TBC1D13	chr9	131549485	131572711	+	ENDOG	no
Caki1	TCEANC	chrX	13671224	13683527	+	RAB9A	yes
Caki1	TFDP2	chr3	141663269	141868386	-
Caki1	TINAGL1	chr1	32042085	32053287	+	HCRTR1	yes
Caki1	TMEM144	chr4	159131400	159176439	+	RXFP1	no
Caki1	TMEM170A	chr16	75477141	75498584	-	CFDP1	yes
Caki1	TMEM41B	chr11	9302200	9336315	-
Caki1	TNFRSF19	chr13	24144508	24250244	+
Caki1	TNS3	chr7	47314751	47621742	-	IGFBP3	no
Caki1	TOMM7	chr7	22852250	22862471	-
Caki1	TSEN15	chr1	184020784	184043344	+	C1orf21	no
Caki1	TXN	chr9	113006091	113018920	-	C9orf152	no
Caki1	UBE2W	chr8	74692331	74791145	-	STAU2	no
Caki1	UPP1	chr7	48128199	48148330	+	ABCA13	no
Caki1	USP22	chr17	20902905	20946352	-
Caki1	VAPA	chr18	9913954	9960018	+
Caki1	VPS53	chr17	411907	618096	-	FAM101B	no
Caki1	WBP5	chrX	102611379	102613397	+	NGFRAP1	yes
Caki1	WDR45B	chr17	80572437	80606411	-
Caki1	WNT10B	chr12	49359122	49365641	-	ARF3	yes
Caki1	XPO7	chr8	21777179	21864096	+	NPM2	yes
Caki1	YPEL5	chr2	30369749	30383399	+	LBH	no
Caki1	ZBTB34	chr9	129622943	129648156	+	RALGPS1	no
Caki1	ZC3H7A	chr16	11844441	11891114	-	TXNDC11	no
Caki1	ZDHHC21	chr9	14555480	14693480	-	TRNA_His_10	no
Caki1	ZFP90	chr16	68573660	68601039	+	CDH3	yes
Caki1	ZFR	chr5	32354455	32444844	-	MTMR12	no
Caki1	ZNF185	chrX	152082985	152142025	+
Caki1	ZNF25	chr10	38238794	38265453	-	ZNF248	no
Caki1	ZNF33B	chr10	43084554	43133992	-	ZNF37BP	no
Caki1	ZNF592	chr15	85291817	85349663	+	ALPK3	no
Caki1	ZNF688	chr16	30581018	30583728	-	ZNF764	no
Caki1	ZNF689	chr16	30613878	30622096	-	ZNF785	yes
ER	ABHD2	chr15	89631380	89745591	+
ER	ACSL4	chrX	108884563	108976621	-	KCNE1L	no
ER	AES	chr19	3052907	3062964	-	TLE2	yes
ER	AGL	chr1	100315639	100389579	+	SLC35A3	no
ER	AGPAT3	chr21	45285115	45407475	+	TRAPPC10	no
ER	ALAS1	chr3	52232098	52248343	+
ER	ALG10B	chr12	38710556	38723528	+
ER	ALS2CL	chr3	46710484	46735194	-
ER	ANKRD10	chr13	111530886	111567454	-	LINC00346	no
ER	ANKRD46	chr8	101521979	101572014	-
ER	APOL6	chr22	36044423	36064456	+	APOL5	yes
ER	ARF6	chr14	50359735	50363772	+	MIR6076	no
ER	ARHGAP23	chr17	36584719	36668628	+
ER	ARHGEF19	chr1	16524598	16539104	-	EPHA2	no
ER	ARSD	chrX	2822010	2847416	-
ER	ATP9B	chr18	76829396	77138282	+	NFATC1	yes
ER	B4GALT6	chr18	29202208	29264686	-
ER	BCORL1	chrX	129139163	129192058	+
ER	BIRC2	chr11	102217912	102249401	+
ER	BNIP1	chr5	172571444	172591390	+
ER	BPGM	chr7	134331530	134364567	+	CALD1	yes
ER	BTRC	chr10	103113789	103317078	+
ER	C11orf24	chr11	68028802	68039469	-	SUV420H1	no
ER	C12orf36	chr12	13523604	13529679	-
ER	C14orf2	chr14	104378624	104387903	-
ER	C17orf97	chr17	260117	264457	+
ER	C19orf12	chr19	30189792	30206696	-
ER	C1GALT1	chr7	7222245	7288280	+	LOC101927354	no
ER	C1orf216	chr1	36179476	36184790	-	PSMB2	no
ER	C2CD2	chr21	43305218	43373999	-	PRDM15	no
ER	C5orf24	chr5	134181369	134195425	+	TXNDC15	no
ER	C5orf30	chr5	102594441	102614361	+
ER	CALD1	chr7	134464163	134655480	+	AGBL3	yes
ER	CARS	chr11	3022151	3078681	-	NAP1L4	no
ER	CASC4	chr15	44580908	44707959	+	CTDSPL2	no
ER	CCDC117	chr22	29168661	29185289	+
ER	CCDC126	chr7	23636997	23684327	+	FAM221A	no
ER	CCDC132	chr7	92861652	92990435	+
ER	CD276	chr15	73976621	74006859	+
ER	CEP170B	chr14	105331649	105363107	+	PLD4	no
ER	CHAMP1	chr13	115079964	115092803	+
ER	CHD1L	chr1	146714290	146767447	+
ER	CREB5	chr7	28338939	28865511	+
ER	CREBBP	chr16	3775055	3930121	-	TRAP1	no
ER	CREM	chr10	35415768	35501886	+	CCNY	no
ER	CSRP2	chr12	77252494	77272820	-
ER	CYCS	chr7	25158269	25164980	-	OSBPL3	no
ER	DBT	chr1	100652477	100715409	-	LRRC39	yes
ER	DDX3X	chrX	41192650	41209524	+	NYX	no
ER	DDX46	chr5	134094423	134166826	+	C5orf24	no
ER	DYNC1I1	chr7	95401817	95739634	+
ER	EDN2	chr1	41944445	41950344	-
ER	EFR3A	chr8	132916355	133025886	+
ER	EPB41L5	chr2	120770603	120936697	+
ER	EPS15	chr1	51819934	51984995	-	TTC39A	no
ER	EPS15L1	chr19	16466054	16582823	-
ER	ETNK1	chr12	22778075	22843608	+	LOC101928441	no
ER	FAF2	chr5	175875355	175937075	+
ER	FAM35BP	chr10	46897640	46939145	+
ER	FAM35DP	chr10	47379719	47421238	+
ER	FAM46A	chr6	82455446	82462428	-
ER	FAM84B	chr8	127564682	127570711	-
ER	FAM91A1	chr8	124780881	124827690	+	FER1L6	yes
ER	FAXC	chr6	99720792	99797531	-	FBXL4	no
ER	FBXL12	chr19	9920942	9929731	-	ZNF846	yes
ER	FCHO2	chr5	72251807	72386349	+	TMEM171	no
ER	FERMT1	chr20	6055491	6104191	-	LRRN4	no
ER	FGFBP3	chr10	93666344	93669258	-
ER	FGFRL1	chr4	1005609	1020686	+
ER	GADD45A	chr1	68150859	68154021	+
ER	GATAD2A	chr19	19496641	19619741	+
ER	GLTSCR1	chr19	48111452	48206534	+	EHD2	yes
ER	GMEB2	chr20	62218954	62258381	-	HELZ2	no
ER	GOLGA4	chr3	37284681	37408370	+	C3orf35	yes
ER	HDAC8	chrX	71549365	71792953	-	CITED1	no
ER	HERC2P9	chr15	28899587	28930410	+
ER	HES1	chr3	193853930	193856401	+
ER	HPX	chr11	6452267	6462254	-	APBB1	yes
ER	IGBP1	chrX	69353317	69386173	+	DGAT2L6	yes
ER	IL4R	chr16	27325229	27376099	+	IL21R	no
ER	IL7R	chr5	35856976	35879705	+
ER	ITGAV	chr2	187454789	187545629	+	FAM171B	no
ER	ITM2C	chr2	231729312	231743969	+	LOC151484	yes
ER	IVD	chr15	40697685	40713512	+	BAHD1	no
ER	KCMF1	chr2	85198230	85286595	+	TCF7L1	yes
ER	KDM6A	chrX	44732420	44971857	+
ER	KIF3C	chr2	26149454	26205443	-	ASXL2	no
ER	L1CAM	chrX	153126968	153151628	-	PDZD4	no
ER	LAMP2	chrX	119560002	119603204	-
ER	LGMN	chr14	93170151	93215047	-
ER	LHFPL1	chrX	111873878	111923375	-
ER	LMNB1	chr5	126112314	126172712	+
ER	LOC730102	chr1	177975274	178007142	-	SEC16B	yes
ER	LRP5	chr11	68080076	68216743	+	PPP6R3	no
ER	MAN2A2	chr15	91446565	91465815	+	UNC45A	no
ER	MAP2K5	chr15	67835020	68099455	+	SKOR1	yes
ER	MAP3K7	chr6	91223291	91297020	-
ER	MAP3K8	chr10	30722949	30750762	+
ER	MAP9	chr4	156263811	156298122	-
ER	MAPKAP1	chr9	128199672	128469513	-
ER	MED30	chr8	118532951	118552501	+
ER	MEX3B	chr15	82334118	82338484	-
ER	MEX3D	chr19	1554667	1568057	-
ER	MGLL	chr3	127407904	127542093	-
ER	MIS18A	chr21	33640529	33651376	-	LINC00159	no
ER	MOSPD1	chrX	134021661	134049297	-
ER	MRAS	chr3	138066489	138124377	+	ESYT3	yes
ER	MRFAP1L1	chr4	6709428	6711606	-
ER	MRPL11	chr11	66202545	66206319	-
ER	MRPL23	chr11	1968501	1977839	+
ER	MTDH	chr8	98656406	98742488	+	LAPTM4B	no
ER	MYBL1	chr8	67474409	67525484	-
ER	MYO5A	chr15	52599479	52821247	-	MYO5C	no
ER	MYSM1	chr1	59120410	59165747	-	TACSTD2	yes
ER	NAMPT	chr7	105888731	105925638	-	SYPL1	no
ER	NDUFA4	chr7	10971579	10979813	-
ER	NECAP1	chr12	8234806	8250373	+	CLEC4A	yes
ER	NEK1	chr4	170314420	170533778	-	SH3RF1	no
ER	NEUROG2	chr4	113434671	113437328	-
ER	NGDN	chr14	23938897	23947402	+	THTPA	yes
ER	NKX3-1	chr8	23536205	23540450	-
ER	NLK	chr17	26369687	26523404	+	PYY2	yes
ER	NLRC5	chr16	57050985	57117436	+	CPNE2	no
ER	NMI	chr2	152126981	152146430	-	RBM43	yes
ER	NPTXR	chr22	39214455	39240017	-	SUN2	no
ER	NUP210	chr3	13357729	13461819	-	IQSEC1	no
ER	OLFML2B	chr1	161952981	161994255	-
ER	PABPC4L	chr4	135117488	135122903	-
ER	PAPD5	chr16	50186828	50269219	+	ADCY7	no
ER	PCGF5	chr10	92922768	93044088	+
ER	PEX5	chr12	7341758	7371169	+	ACSM4	no
ER	PIK3C2A	chr11	17108123	17191354	-	RPS13	no
ER	PLEKHF1	chr19	30156326	30166383	+
ER	PLXNA1	chr3	126707436	126756235	+	C3orf56	no
ER	POLD3	chr11	74303574	74354105	+
ER	PPA2	chr4	106290233	106395227	-
ER	PRPF19	chr11	60658019	60674061	-
ER	PRPSAP2	chr17	18759611	18834599	+	SLC5A10	yes
ER	PSMB6	chr17	4699438	4701798	+	PLD2	yes
ER	PTGER4	chr5	40680031	40693837	+
ER	PTPN3	chr9	112137973	112260593	-	EPB41L4B	no
ER	QSER1	chr11	32914723	33014862	+	DEPDC7	yes
ER	RASEF	chr9	85594499	85678043	-
ER	RBBP6	chr16	24550907	24584183	+
ER	RBM3	chrX	48432740	48439553	+	WDR13	yes
ER	RCBTB2	chr13	49063098	49110118	-
ER	REST	chr4	57774041	57802010	+
ER	RGS2	chr1	192778168	192781407	+
ER	RNF111	chr15	59279864	59389618	+	CCNB2	no
ER	RNF38	chr9	36336398	36401195	-	GNE	yes
ER	RNF6	chr13	26786904	26796508	-	SHISA2	no
ER	SAE1	chr19	47634079	47713893	+
ER	SAMD5	chr6	147829827	147891157	+	SASH1	no
ER	SEL1L3	chr4	25749048	25865217	-
ER	SENP6	chr6	76311621	76427994	+	MYO6	no
ER	SETD7	chr4	140427191	140477577	-
ER	SIKE1	chr1	115312104	115323308	-	CSDE1	no
ER	SLC39A11	chr17	70642084	71088853	-	LINC00511	no
ER	SLC41A1	chr1	205758220	205782161	-	RAB29	no
ER	SLC4A4	chr4	72053002	72437804	+
ER	SLC9A8	chr20	48429249	48508779	+
ER	SMARCA2	chr9	2015218	2193623	+
ER	SNRNP70	chr19	49588396	49611870	+	LIN7B	no
ER	SNRPE	chr1	203830726	203840280	+
ER	SNX4	chr3	125165487	125239058	-	ZNF148	no
ER	SOAT1	chr1	179262848	179327814	+	AXDND1	no
ER	SOD3	chr4	24797084	24802467	+
ER	SRP9	chr1	225965514	225978168	+	EPHX1	no
ER	SSR2	chr1	155978838	155990758	-	ARHGEF2	yes
ER	STK35	chr20	2082527	2129198	+	LOC388780	no
ER	STX2	chr12	131274144	131323819	-	RIMBP2	no
ER	TAF15	chr17	34136458	34174246	+
ER	TBC1D13	chr9	131549485	131572711	+	ENDOG	no
ER	TCEANC	chrX	13671224	13683527	+	RAB9A	no
ER	TFDP1	chr13	114239002	114295788	+
ER	TFE3	chrX	48886237	48901043	-	GRIPAP1	no
ER	THUMPD1	chr16	20744985	20753199	-	ACSM1	yes
ER	TICAM1	chr19	4815935	4831754	-
ER	TINAG	chr6	54173202	54254950	+	FAM83B	no
ER	TINAGL1	chr1	32042085	32053287	+	HCRTR1	no
ER	TIPRL	chr1	168148082	168171351	+	TBX19	yes
ER	TMEM144	chr4	159131400	159176439	+	RXFP1	no
ER	TMEM170A	chr16	75477141	75498584	-	CFDP1	yes
ER	TMPRSS11D	chr4	68686593	68749716	-	GNRHR	no
ER	TRIM47	chr17	73870244	73874656	-	WBP2	yes
ER	TRPS1	chr8	116420723	116681255	-	CSMD3	no
ER	TUBA1B	chr12	49521566	49525304	-	LMBR1L	yes
ER	TXN	chr9	113006091	113018920	-	C9orf152	yes
ER	UBE2I	chr16	1359153	1377019	+	BAIAP3	yes
ER	UBXN8	chr8	30601681	30624520	+
ER	USP10	chr16	84733554	84813527	+	CRISPLD2	yes
ER	USP31	chr16	23072727	23160591	-
ER	USP7	chr16	8985950	9057341	-	CARHSP1	no
ER	UTP14A	chrX	129040096	129063738	+	BCORL1	yes
ER	VAPA	chr18	9913954	9960018	+
ER	VAPB	chr20	56964174	57026156	+
ER	VHL	chr3	10183318	10195354	+	IRAK2	no
ER	VPS53	chr17	411907	618096	-	FAM101B	no
ER	WBP5	chrX	102611379	102613397	+	NGFRAP1	no
ER	WNT10B	chr12	49359122	49365641	-	ARF3	no
ER	YTHDF1	chr20	61826781	61847538	-
ER	ZBTB38	chr3	141043054	141168632	+	RASA2	no
ER	ZBTB43	chr9	129567284	129600487	+	ZBTB34	no
ER	ZC3H4	chr19	47567446	47617009	-	TMEM160	no
ER	ZC3H7A	chr16	11844441	11891114	-	TXNDC11	no
ER	ZFAND3	chr6	37787306	38122399	+
ER	ZFP1	chr16	75182420	75206132	+
ER	ZFP36L1	chr14	69254371	69262960	-
ER	ZFR	chr5	32354455	32444844	-	MTMR12	no
ER	ZHX2	chr8	123793900	123986755	+
ER	ZNF2	chr2	95831161	95850064	+	PROM2	no
ER	ZNF200	chr16	3272324	3285457	-
ER	ZNF346	chr5	176449696	176508190	+	FGFR4	no
ER	ZNF43	chr19	21987750	22034870	-	ZNF100	no
ER	ZW10	chr11	113603904	113644485	-	TMPRSS5	no
FG2	AES	chr19	3052907	3062964	-	TLE2	no
FG2	AGL	chr1	100315639	100389579	+	SLC35A3	yes
FG2	AHDC1	chr1	27860755	27930005	-	WASF2	no
FG2	AHNAK	chr11	62201013	62314332	-
FG2	AKR1E2	chr10	4868368	4890251	+
FG2	ALDH5A1	chr6	24495196	24537435	+
FG2	ALG10B	chr12	38710556	38723528	+
FG2	ANKRD10	chr13	111530886	111567454	-	LINC00346	no
FG2	ANKRD46	chr8	101521979	101572014	-
FG2	APPBP2	chr17	58520509	58603601	-
FG2	ARF6	chr14	50359735	50363772	+	MIR6076	no
FG2	ARHGAP12	chr10	32094325	32217804	-
FG2	ARHGAP23	chr17	36584719	36668628	+
FG2	ARSD	chrX	2822010	2847416	-
FG2	ATP11C	chrX	138808504	138914447	-	MCF2	no
FG2	ATP9B	chr18	76829396	77138282	+	NFATC1	yes
FG2	AUH	chr9	93976096	94124206	-	LOC100129316	no
FG2	B4GALT6	chr18	29202208	29264686	-
FG2	BCL7B	chr7	72950682	72972065	-	BAZ1B	no
FG2	BCORL1	chrX	129139163	129192058	+
FG2	BIRC2	chr11	102217912	102249401	+
FG2	BLOC1S6	chr15	45879416	45901909	+	SQRDL	no
FG2	BNC2	chr9	16409500	16870786	-	C9orf92	no
FG2	BTBD11	chr12	107712196	108053419	+	PWP1	no
FG2	C14orf2	chr14	104378624	104387903	-
FG2	C17orf97	chr17	260117	264457	+
FG2	C19orf12	chr19	30189792	30206696	-
FG2	C1GALT1	chr7	7222245	7288280	+	LOC101927354	no
FG2	C2CD2	chr21	43305218	43373999	-	PRDM15	no
FG2	C6orf203	chr6	107349375	107372790	+
FG2	C9orf89	chr9	95858449	95875565	+
FG2	CALD1	chr7	134464163	134655480	+	AGBL3	no
FG2	CAMK2D	chr4	114372187	114683083	-
FG2	CARS	chr11	3022151	3078681	-	NAP1L4	no
FG2	CASC4	chr15	44580908	44707959	+	CTDSPL2	no
FG2	CBFB	chr16	67063049	67134958	+	C16orf70	no
FG2	CBX7	chr22	39526778	39548538	-
FG2	CCDC132	chr7	92861652	92990435	+
FG2	CCNY	chr10	35535908	35861598	+	GJD4	no
FG2	CCSER2	chr10	86088344	86278277	+
FG2	CD83	chr6	14117486	14137148	+
FG2	CEP170B	chr14	105331649	105363107	+	PLD4	no
FG2	CHAMP1	chr13	115079964	115092803	+
FG2	CNOT8	chr5	154237808	154256352	+
FG2	COIL	chr17	55015560	55038411	-	TRIM25	no
FG2	COPS4	chr4	83956238	83996971	+
FG2	CPEB4	chr5	173315330	173387313	+	C5orf47	no
FG2	CREB5	chr7	28338939	28865511	+
FG2	CREBBP	chr16	3775055	3930121	-	TRAP1	no
FG2	CSRP2	chr12	77252494	77272820	-
FG2	CYCS	chr7	25158269	25164980	-	OSBPL3	no
FG2	DDX46	chr5	134094423	134166826	+	C5orf24	no
FG2	DNAJA2	chr16	46989273	47007625	-
FG2	DSTYK	chr1	205111630	205180727	-	RBBP5	no
FG2	DUSP12	chr1	161719580	161726952	+	ATF6	no
FG2	DYNC1I1	chr7	95401817	95739634	+
FG2	DYNC2H1	chr11	102980159	103350591	+	MIR4693	no
FG2	EPAS1	chr2	46524540	46613842	+	LOC101805491	no
FG2	EPB41L5	chr2	120770603	120936697	+
FG2	EPS15	chr1	51819934	51984995	-	TTC39A	yes
FG2	EPS15L1	chr19	16466054	16582823	-
FG2	FAF2	chr5	175875355	175937075	+
FG2	FAM101B	chr17	289770	295731	-
FG2	FAM35BP	chr10	46897640	46939145	+
FG2	FAM35DP	chr10	47379719	47421238	+
FG2	FAM73B	chr9	131798922	131834351	+	DOLPP1	no
FG2	FAM84B	chr8	127564682	127570711	-
FG2	FAM91A1	chr8	124780881	124827690	+	FER1L6	no
FG2	FAXC	chr6	99720792	99797531	-	FBXL4	no
FG2	FBXL12	chr19	9920942	9929731	-	ZNF846	no
FG2	FBXO28	chr1	224301788	224349749	+	DEGS1	no
FG2	FCHO2	chr5	72251807	72386349	+	TMEM171	no
FG2	FECH	chr18	55212072	55253969	-
FG2	FERMT1	chr20	6055491	6104191	-	LRRN4	no
FG2	FGFBP3	chr10	93666344	93669258	-
FG2	FGFRL1	chr4	1005609	1020686	+
FG2	FOXA1	chr14	38058756	38064325	-
FG2	GABARAPL1	chr12	10365488	10375724	+	KLRD1	yes
FG2	GADD45A	chr1	68150859	68154021	+
FG2	GATAD2A	chr19	19496641	19619741	+
FG2	GBP4	chr1	89646830	89664633	-	GBP7	no
FG2	GFPT2	chr5	179727699	179780315	-	MAPK9	no
FG2	GLIPR2	chr9	36136532	36163910	+	CCIN	no
FG2	GLTP	chr12	110288747	110318293	-
FG2	GLTSCR1	chr19	48111452	48206534	+	EHD2	no
FG2	GNA11	chr19	3094407	3124000	+	GNA15	no
FG2	GOLGA4	chr3	37284681	37408370	+	C3orf35	yes
FG2	GOT2	chr16	58741034	58768261	-	SLC38A7	no
FG2	GPNMB	chr7	23286315	23314729	+	MALSU1	no
FG2	H6PD	chr1	9294862	9331394	+	SPSB1	yes
FG2	HERC2P9	chr15	28899587	28930410	+
FG2	HES1	chr3	193853930	193856401	+
FG2	HGSNAT	chr8	42995591	43057970	+	POTEA	no
FG2	HIC2	chr22	21771692	21805750	+	TMEM191C	no
FG2	HOOK1	chr1	60280462	60342050	+
FG2	HSD17B4	chr5	118788137	118878030	+	FAM170A	no
FG2	IFI16	chr1	158979681	159024945	+
FG2	IFNGR1	chr6	137518620	137540567	-	IL22RA2	no
FG2	IFT52	chr20	42219578	42275862	+	MYBL2	no
FG2	IFT57	chr3	107879658	107941417	-
FG2	IGBP1	chrX	69353317	69386173	+	DGAT2L6	no
FG2	IL4R	chr16	27325229	27376099	+	IL21R	no
FG2	IL7R	chr5	35856976	35879705	+
FG2	IPW	chr15	25361691	25367623	+	PWAR1	no
FG2	ITGAV	chr2	187454789	187545629	+	FAM171B	no
FG2	ITM2C	chr2	231729312	231743969	+	LOC151484	no
FG2	IVD	chr15	40697685	40713512	+	BAHD1	no
FG2	KDM6A	chrX	44732420	44971857	+
FG2	KIAA2018	chr3	113367232	113415493	-
FG2	KLHDC10	chr7	129710348	129775560	+
FG2	LGMN	chr14	93170151	93215047	-
FG2	LHFPL1	chrX	111873878	111923375	-
FG2	LMNB1	chr5	126112314	126172712	+
FG2	LOC100507537	chr3	155008020	155011489	-
FG2	LOC728743	chr7	150102839	150109558	+	LINC00996	no
FG2	LOC730102	chr1	177975274	178007142	-	SEC16B	yes
FG2	LURAP1L	chr9	12775011	12823059	+
FG2	MAN2A2	chr15	91446565	91465815	+	UNC45A	no
FG2	MAP2K5	chr15	67835020	68099455	+	SKOR1	yes
FG2	MAP3K7	chr6	91223291	91297020	-
FG2	MAPK13	chr6	36098260	36112301	+	BRPF3	no
FG2	MAPK9	chr5	179660594	179719071	-	RASGEF1C	no
FG2	MBNL2	chr13	97874549	98046374	+	RAP2A	no
FG2	MED30	chr8	118532951	118552501	+
FG2	MGLL	chr3	127407904	127542093	-
FG2	MGST1	chr12	16500075	16530123	+
FG2	MICB_1	chr6	31462657	31478901	+	MCCD1_1	no
FG2	MOSPD1	chrX	134021661	134049297	-
FG2	MR1	chr1	181002560	181031074	+	IER5	no
FG2	MSX1	chr4	4861391	4865660	+
FG2	MYBL1	chr8	67474409	67525484	-
FG2	NAMPT	chr7	105888731	105925638	-	SYPL1	no
FG2	NECAP1	chr12	8234806	8250373	+	CLEC4A	yes
FG2	NEDD4L	chr18	55711609	56068772	+	MIR122	no
FG2	NEUROG2	chr4	113434671	113437328	-
FG2	NFIC	chr19	3359560	3469215	+
FG2	NIPA1	chr15	23043278	23086843	-	NIPA2	no
FG2	NLK	chr17	26369687	26523404	+	PYY2	no
FG2	NLRC5	chr16	57050985	57117436	+	CPNE2	no
FG2	NMI	chr2	152126981	152146430	-	RBM43	no
FG2	NPTXR	chr22	39214455	39240017	-	SUN2	no
FG2	NXT2	chrX	108779009	108787927	+
FG2	OLA1	chr2	174937174	175113365	-	SP3	no
FG2	PAPD5	chr16	50186828	50269219	+	ADCY7	no
FG2	PARP16	chr15	65550436	65579018	-	CILP	no
FG2	PCGF5	chr10	92922768	93044088	+
FG2	PCMTD2	chr20	62887047	62907579	+	LINC00266-1	no
FG2	PEX5	chr12	7341758	7371169	+	ACSM4	no
FG2	PGM1	chr1	64058946	64125916	+	ROR1	no
FG2	PIF1	chr15	65107828	65117867	-	RBPMS2	no
FG2	PIK3C2A	chr11	17108123	17191354	-	RPS13	no
FG2	PLD2	chr17	4710395	4726727	+	MINK1	no
FG2	PLEKHF1	chr19	30156326	30166383	+
FG2	PLXNA1	chr3	126707436	126756235	+	C3orf56	no
FG2	POLD3	chr11	74303574	74354105	+
FG2	PPA2	chr4	106290233	106395227	-
FG2	PRPF19	chr11	60658019	60674061	-
FG2	PSD3	chr8	18384812	18871196	-
FG2	PSMB6	chr17	4699438	4701798	+	PLD2	no
FG2	PTGER4	chr5	40680031	40693837	+
FG2	PTPN3	chr9	112137973	112260593	-	EPB41L4B	no
FG2	PTPRE	chr10	129705324	129884164	+
FG2	QSER1	chr11	32914723	33014862	+	DEPDC7	no
FG2	RASA3	chr13	114747193	114898095	-	LINC00565	no
FG2	RBBP6	chr16	24550907	24584183	+
FG2	RBM3	chrX	48432740	48439553	+	WDR13	no
FG2	REEP3	chr10	65281122	65384883	+	ANXA2P3	no
FG2	RGS2	chr1	192778168	192781407	+
FG2	RNF111	chr15	59279864	59389618	+	CCNB2	no
FG2	RP9	chr7	33134409	33149002	-	NT5C3A	no
FG2	SAR1B	chr5	133936838	133968533	-
FG2	SBNO1	chr12	123773655	123834988	-	CDK2AP1	no
FG2	SEC24A	chr5	133984474	134063601	+	CAMLG	no
FG2	SEL1L3	chr4	25749048	25865217	-
FG2	SENP6	chr6	76311621	76427994	+	MYO6	no
FG2	SH3TC1	chr4	8201059	8242830	+	HTRA3	no
FG2	SHQ1	chr3	72798427	72897598	-	RYBP	no
FG2	SIKE1	chr1	115312104	115323308	-	CSDE1	no
FG2	SLC15A4	chr12	129277738	129308541	-
FG2	SLC41A1	chr1	205758220	205782161	-	RAB29	no
FG2	SLC4A4	chr4	72053002	72437804	+
FG2	SLC9A8	chr20	48429249	48508779	+
FG2	SMEK1	chr14	91923824	91976824	-	CCDC88C	no
FG2	SNRNP70	chr19	49588396	49611870	+	LIN7B	yes
FG2	SNX3	chr6	108532420	108582464	-
FG2	SP1	chr12	53773978	53810226	+	AMHR2	yes
FG2	SQRDL	chr15	45923345	45983492	+	SEMA6D	no
FG2	SREK1	chr5	65440045	65479444	+
FG2	SRP9	chr1	225965514	225978168	+	EPHX1	no
FG2	STAG2	chrX	123094409	123236505	+	SH2D1A	no
FG2	STK11IP	chr2	220462595	220481173	+	SLC4A3	yes
FG2	STX12	chr1	28099693	28150963	+	PPP1R8	no
FG2	TAF15	chr17	34136458	34174246	+
FG2	TBC1D13	chr9	131549485	131572711	+	ENDOG	no
FG2	TCEANC	chrX	13671224	13683527	+	RAB9A	yes
FG2	TEX15	chr8	30689059	30706533	-	PPP2CB	no
FG2	THUMPD1	chr16	20744985	20753199	-	ACSM1	yes
FG2	TICAM1	chr19	4815935	4831754	-
FG2	TINAG	chr6	54173202	54254950	+	FAM83B	no
FG2	TINAGL1	chr1	32042085	32053287	+	HCRTR1	no
FG2	TMEM144	chr4	159131400	159176439	+	RXFP1	no
FG2	TMEM170A	chr16	75477141	75498584	-	CFDP1	yes
FG2	TMEM173	chr5	138855112	138862343	-	ECSCR	no
FG2	TMEM41B	chr11	9302200	9336315	-
FG2	TMPRSS11D	chr4	68686593	68749716	-	GNRHR	no
FG2	TOMM7	chr7	22852250	22862471	-
FG2	TRPS1	chr8	116420723	116681255	-	CSMD3	no
FG2	TUBA1B	chr12	49521566	49525304	-	LMBR1L	yes
FG2	TXN	chr9	113006091	113018920	-	C9orf152	yes
FG2	UBE2I	chr16	1359153	1377019	+	BAIAP3	yes
FG2	UBR1	chr15	43235097	43398286	-	TTBK2	yes
FG2	UPP1	chr7	48128199	48148330	+	ABCA13	no
FG2	USP10	chr16	84733554	84813527	+	CRISPLD2	yes
FG2	UTP14A	chrX	129040096	129063738	+	BCORL1	yes
FG2	VAPA	chr18	9913954	9960018	+
FG2	VHL	chr3	10183318	10195354	+	IRAK2	no
FG2	VPS53	chr17	411907	618096	-	FAM101B	no
FG2	WBP5	chrX	102611379	102613397	+	NGFRAP1	no
FG2	WDR45B	chr17	80572437	80606411	-
FG2	WNT10B	chr12	49359122	49365641	-	ARF3	no
FG2	WNT7B	chr22	46316247	46373008	-
FG2	XPO7	chr8	21777179	21864096	+	NPM2	no
FG2	ZBTB2	chr6	151685249	151712677	-
FG2	ZBTB38	chr3	141043054	141168632	+	RASA2	yes
FG2	ZC3H4	chr19	47567446	47617009	-	TMEM160	no
FG2	ZC3H7A	chr16	11844441	11891114	-	TXNDC11	no
FG2	ZCCHC24	chr10	81142082	81205383	-
FG2	ZFAND3	chr6	37787306	38122399	+
FG2	ZFP36L1	chr14	69254371	69262960	-
FG2	ZHX2	chr8	123793900	123986755	+
FG2	ZNF12	chr7	6728063	6746566	-
FG2	ZNF2	chr2	95831161	95850064	+	PROM2	no
FG2	ZNF200	chr16	3272324	3285457	-
FG2	ZNF260	chr19	37001588	37019248	-
FG2	ZNF330	chr4	142142040	142155850	+
FG2	ZNF33B	chr10	43084554	43133992	-	ZNF37BP	no
FG2	ZNF346	chr5	176449696	176508190	+	FGFR4	yes
FG2	ZNF43	chr19	21987750	22034870	-	ZNF100	no
FG2	ZNF592	chr15	85291817	85349663	+	ALPK3	no
FG2	ZNF608	chr5	123972609	124084500	-
FG2	ZNF626	chr19	20802744	20844402	-	ZNF737	no
FG2	ZNF682	chr19	20115226	20150277	-
FG2	ZNF689	chr16	30613878	30622096	-	ZNF785	no
MF	ABCF2	chr7	150904922	150924460	-	IQCA1L	no
MF	ABLIM3	chr5	148521045	148640001	+	AFAP1L1	no
MF	ACSL4	chrX	108884563	108976621	-	KCNE1L	no
MF	AEBP2	chr12	19592607	19675173	+	LOC100506393	no
MF	AES	chr19	3052907	3062964	-	TLE2	yes
MF	AGL	chr1	100315639	100389579	+	SLC35A3	no
MF	AGPAT3	chr21	45285115	45407475	+	TRAPPC10	no
MF	AHDC1	chr1	27860755	27930005	-	WASF2	no
MF	ALAS1	chr3	52232098	52248343	+
MF	ALDH5A1	chr6	24495196	24537435	+
MF	ALS2CL	chr3	46710484	46735194	-
MF	ANKRD10	chr13	111530886	111567454	-	LINC00346	no
MF	APOL6	chr22	36044423	36064456	+	APOL5	no
MF	ARF6	chr14	50359735	50363772	+	MIR6076	no
MF	ARHGAP23	chr17	36584719	36668628	+
MF	ARHGEF19	chr1	16524598	16539104	-	EPHA2	no
MF	ARMCX2	chrX	100910267	100914876	-
MF	ASB13	chr10	5680819	5708558	-
MF	ATP9B	chr18	76829396	77138282	+	NFATC1	yes
MF	AUH	chr9	93976096	94124206	-	LOC100129316	no
MF	B4GALT6	chr18	29202208	29264686	-
MF	BAZ1A	chr14	35221936	35344853	-	CFL2	no
MF	BCORL1	chrX	129139163	129192058	+
MF	BIRC2	chr11	102217912	102249401	+
MF	BNIP1	chr5	172571444	172591390	+
MF	BTRC	chr10	103113789	103317078	+
MF	C12orf5	chr12	4430358	4469190	+
MF	C19orf12	chr19	30189792	30206696	-
MF	C1GALT1	chr7	7222245	7288280	+	LOC101927354	no
MF	C1orf52	chr1	85715636	85725355	-	SYDE2	no
MF	C2CD2	chr21	43305218	43373999	-	PRDM15	no
MF	C2orf27A	chr2	132480063	132524977	+
MF	C2orf27B	chr2	132552533	132559234	-
MF	C5orf24	chr5	134181369	134195425	+	TXNDC15	no
MF	C6orf58	chr6	127898318	127912963	+
MF	C9orf89	chr9	95858449	95875565	+
MF	CALD1	chr7	134464163	134655480	+	AGBL3	yes
MF	CAMK2D	chr4	114372187	114683083	-
MF	CAMSAP1	chr9	138700332	138799005	-
MF	CAPRIN2	chr12	30862485	30907448	-	IPO8	no
MF	CARS	chr11	3022151	3078681	-	NAP1L4	no
MF	CBFB	chr16	67063049	67134958	+	C16orf70	no
MF	CBX7	chr22	39526778	39548538	-
MF	CCDC117	chr22	29168661	29185289	+
MF	CCDC126	chr7	23636997	23684327	+	FAM221A	no
MF	CCNY	chr10	35535908	35861598	+	GJD4	yes
MF	CD276	chr15	73976621	74006859	+
MF	CD83	chr6	14117486	14137148	+
MF	CDK14	chr7	90095737	90839905	+	FZD1	no
MF	CEP170B	chr14	105331649	105363107	+	PLD4	no
MF	CHAMP1	chr13	115079964	115092803	+
MF	CHCHD6	chr3	126423062	126679263	+	PLXNA1	no
MF	CHD1L	chr1	146714290	146767447	+
MF	CNOT8	chr5	154237808	154256352	+
MF	CREBBP	chr16	3775055	3930121	-	TRAP1	no
MF	CREM	chr10	35415768	35501886	+	CCNY	no
MF	CTR9	chr11	10772810	10801290	+
MF	CYCS	chr7	25158269	25164980	-	OSBPL3	no
MF	DAD1	chr14	23033806	23058143	-	AK125397	no
MF	DDX3X	chrX	41192650	41209524	+	NYX	no
MF	DDX46	chr5	134094423	134166826	+	C5orf24	no
MF	DNAJA2	chr16	46989273	47007625	-
MF	ECHDC3	chr10	11784355	11806065	+	PROSER2	no
MF	EFR3A	chr8	132916355	133025886	+
MF	ELAVL1	chr19	8023456	8070529	-	TIMM44	no
MF	ELP3	chr8	27947747	28048669	+	PNOC	no
MF	EPB41L5	chr2	120770603	120936697	+
MF	EPS15	chr1	51819934	51984995	-	TTC39A	yes
MF	EPS15L1	chr19	16466054	16582823	-
MF	ETS2	chr21	40177230	40196878	+	LOC101928398	no
MF	FAM35BP	chr10	46897640	46939145	+
MF	FAM35DP	chr10	47379719	47421238	+
MF	FAM46A	chr6	82455446	82462428	-
MF	FAM84B	chr8	127564682	127570711	-
MF	FBXL12	chr19	9920942	9929731	-	ZNF846	no
MF	FBXO28	chr1	224301788	224349749	+	DEGS1	no
MF	FERMT1	chr20	6055491	6104191	-	LRRN4	no
MF	FGFBP3	chr10	93666344	93669258	-
MF	FGFRL1	chr4	1005609	1020686	+
MF	GABARAPL1	chr12	10365488	10375724	+	KLRD1	yes
MF	GATAD2A	chr19	19496641	19619741	+
MF	GKAP1	chr9	86354335	86444431	-
MF	GNA11	chr19	3094407	3124000	+	GNA15	no
MF	GOLGA4	chr3	37284681	37408370	+	C3orf35	no
MF	GOT2	chr16	58741034	58768261	-	SLC38A7	no
MF	GPCPD1	chr20	5525079	5591672	-	LOC101929207	no
MF	GPT2	chr16	46918307	46965201	+
MF	H6PD	chr1	9294862	9331394	+	SPSB1	yes
MF	HDAC8	chrX	71549365	71792953	-	CITED1	no
MF	HERC2P9	chr15	28899587	28930410	+
MF	HES1	chr3	193853930	193856401	+
MF	HIC2	chr22	21771692	21805750	+	TMEM191C	no
MF	HMG20B	chr19	3572942	3579081	+	GIPC3	no
MF	HNF4G	chr8	76320182	76479061	+	LINC01111	no
MF	HSD17B4	chr5	118788137	118878030	+	FAM170A	yes
MF	IFI16	chr1	158979681	159024945	+
MF	IL4R	chr16	27325229	27376099	+	IL21R	no
MF	IPO8	chr12	30781914	30848929	-	TMTC1	no
MF	IPW	chr15	25361691	25367623	+	PWAR1	no
MF	IQGAP1	chr15	90931472	91045475	+	CRTC3	no
MF	ITGAX	chr16	31366454	31394318	+	ITGAD	no
MF	IVD	chr15	40697685	40713512	+	BAHD1	no
MF	KCMF1	chr2	85198230	85286595	+	TCF7L1	no
MF	KDM6A	chrX	44732420	44971857	+
MF	KIAA2018	chr3	113367232	113415493	-
MF	KLF4	chr9	110247132	110252047	-	LOC101928720	no
MF	LAMP2	chrX	119560002	119603204	-
MF	LEPREL1	chr3	189674516	189840226	-
MF	LINC00333	chr13	84714736	85180903	+	LINC00351	no
MF	LMNB1	chr5	126112314	126172712	+
MF	LOC728743	chr7	150102839	150109558	+	LINC00996	no
MF	LOC730102	chr1	177975274	178007142	-	SEC16B	yes
MF	LRP5	chr11	68080076	68216743	+	PPP6R3	no
MF	LRRC27	chr10	134145613	134195010	+	PWWP2B	no
MF	MAP2K5	chr15	67835020	68099455	+	SKOR1	yes
MF	MAP3K7	chr6	91223291	91297020	-
MF	MAP3K8	chr10	30722949	30750762	+
MF	MAPKAP1	chr9	128199672	128469513	-
MF	MEIS3	chr19	47906374	47922785	-
MF	MEX3D	chr19	1554667	1568057	-
MF	MGLL	chr3	127407904	127542093	-
MF	MKRN1	chr7	140152839	140179369	-
MF	MMP7	chr11	102391238	102401478	-	TMEM123	no
MF	MR1	chr1	181002560	181031074	+	IER5	no
MF	MRFAP1L1	chr4	6709428	6711606	-
MF	MRPL23	chr11	1968501	1977839	+
MF	MTDH	chr8	98656406	98742488	+	LAPTM4B	no
MF	MTFMT	chr15	65293849	65321977	-	SPG21	no
MF	MYBL1	chr8	67474409	67525484	-
MF	NDUFA4	chr7	10971579	10979813	-
MF	NECAP1	chr12	8234806	8250373	+	CLEC4A	yes
MF	NEDD4L	chr18	55711609	56068772	+	MIR122	no
MF	NEK1	chr4	170314420	170533778	-	SH3RF1	no
MF	NFIC	chr19	3359560	3469215	+
MF	NFU1	chr2	69623244	69664760	-	GFPT1	no
MF	NGDN	chr14	23938897	23947402	+	THTPA	no
MF	NLK	chr17	26369687	26523404	+	PYY2	yes
MF	NOV	chr8	120428551	120436678	+
MF	NPTXR	chr22	39214455	39240017	-	SUN2	no
MF	OLFML2B	chr1	161952981	161994255	-
MF	OTUD3	chr1	20208887	20239437	+
MF	PCSK5	chr9	78505559	78977255	+
MF	PEX5	chr12	7341758	7371169	+	ACSM4	no
MF	PIK3C2A	chr11	17108123	17191354	-	RPS13	no
MF	PLEKHF1	chr19	30156326	30166383	+
MF	PLXNA1	chr3	126707436	126756235	+	C3orf56	no
MF	POLD3	chr11	74303574	74354105	+
MF	POP4	chr19	30097169	30108162	+	PLEKHF1	no
MF	POPDC2	chr3	119360907	119379404	-
MF	PPA2	chr4	106290233	106395227	-
MF	PRPF19	chr11	60658019	60674061	-
MF	PSMB6	chr17	4699438	4701798	+	PLD2	yes
MF	PTAR1	chr9	72324437	72374876	-	APBA1	no
MF	PTGER4	chr5	40680031	40693837	+
MF	PTP4A2	chr1	32372021	32403988	-	SPOCD1	no
MF	RALA	chr7	39663151	39747723	+	LINC00265	no
MF	RAN	chr12	131356538	131362223	+	GPR133	no
MF	RASA3	chr13	114747193	114898095	-	LINC00565	no
MF	RBBP6	chr16	24550907	24584183	+
MF	RBM3	chrX	48432740	48439553	+	WDR13	no
MF	RNF111	chr15	59279864	59389618	+	CCNB2	no
MF	RNF44	chr5	175953699	175964421	-
MF	RNF6	chr13	26786904	26796508	-	SHISA2	no
MF	RNF8	chr6	37321747	37362514	+	CMTR1	no
MF	RP9	chr7	33134409	33149002	-	NT5C3A	no
MF	SAE1	chr19	47634079	47713893	+
MF	SBNO1	chr12	123773655	123834988	-	CDK2AP1	no
MF	SDSL	chr12	113860215	113876081	+
MF	SEL1L3	chr4	25749048	25865217	-
MF	SENP6	chr6	76311621	76427994	+	MYO6	no
MF	SLC39A11	chr17	70642084	71088853	-	LINC00511	no
MF	SLC41A1	chr1	205758220	205782161	-	RAB29	no
MF	SLC9A8	chr20	48429249	48508779	+
MF	SMO	chr7	128828712	128853385	+	AHCYL2	no
MF	SMYD3	chr1	245912641	246670644	-
MF	SNRNP70	chr19	49588396	49611870	+	LIN7B	no
MF	SNX29	chr16	12070601	12668146	+
MF	SNX4	chr3	125165487	125239058	-	ZNF148	no
MF	SOAT1	chr1	179262848	179327814	+	AXDND1	no
MF	SP1	chr12	53773978	53810226	+	AMHR2	no
MF	SPTLC2	chr14	77972339	78083110	-	ISM2	no
MF	SRP9	chr1	225965514	225978168	+	EPHX1	no
MF	SSR2	chr1	155978838	155990758	-	ARHGEF2	no
MF	SSX2IP	chr1	85109389	85156440	-	C1orf180	no
MF	STK11IP	chr2	220462595	220481173	+	SLC4A3	no
MF	STK35	chr20	2082527	2129198	+	LOC388780	no
MF	STX2	chr12	131274144	131323819	-	RIMBP2	no
MF	TAF15	chr17	34136458	34174246	+
MF	TAF4B	chr18	23806408	23971650	+	LOC100506787	no
MF	TBC1D13	chr9	131549485	131572711	+	ENDOG	no
MF	TCEANC	chrX	13671224	13683527	+	RAB9A	no
MF	TEX30	chr13	103418237	103426171	-	CCDC168	no
MF	TFDP1	chr13	114239002	114295788	+
MF	THUMPD1	chr16	20744985	20753199	-	ACSM1	yes
MF	TICAM1	chr19	4815935	4831754	-
MF	TINAG	chr6	54173202	54254950	+	FAM83B	no
MF	TIPRL	chr1	168148082	168171351	+	TBX19	no
MF	TMEM144	chr4	159131400	159176439	+	RXFP1	no
MF	TMEM170A	chr16	75477141	75498584	-	CFDP1	yes
MF	TRPS1	chr8	116420723	116681255	-	CSMD3	no
MF	TUBA1B	chr12	49521566	49525304	-	LMBR1L	yes
MF	TWSG1	chr18	9334764	9402418	+	RALBP1	no
MF	TXN	chr9	113006091	113018920	-	C9orf152	no
MF	UBE2I	chr16	1359153	1377019	+	BAIAP3	yes
MF	UBR1	chr15	43235097	43398286	-	TTBK2	yes
MF	USP10	chr16	84733554	84813527	+	CRISPLD2	yes
MF	USP22	chr17	20902905	20946352	-
MF	USP31	chr16	23072727	23160591	-
MF	UTP14A	chrX	129040096	129063738	+	BCORL1	yes
MF	VWA1	chr1	1370902	1378262	+	ATAD3C	no
MF	WBP5	chrX	102611379	102613397	+	NGFRAP1	no
MF	YAE1D1	chr7	39605974	39651688	+	RALA	no
MF	YTHDC1_1	chr4	69176104	69215824	-	TMPRSS11B	no
MF	YTHDF1	chr20	61826781	61847538	-
MF	ZBTB38	chr3	141043054	141168632	+	RASA2	no
MF	ZC3H4	chr19	47567446	47617009	-	TMEM160	no
MF	ZC3H7A	chr16	11844441	11891114	-	TXNDC11	no
MF	ZFAND3	chr6	37787306	38122399	+
MF	ZFP1	chr16	75182420	75206132	+
MF	ZFR	chr5	32354455	32444844	-	MTMR12	no
MF	ZHX2	chr8	123793900	123986755	+
MF	ZIC2	chr13	100634025	100639019	+
MF	ZNF133	chr20	18268926	18297640	+	LINC00851	no
MF	ZNF2	chr2	95831161	95850064	+	PROM2	no
MF	ZNF200	chr16	3272324	3285457	-
MF	ZNF329	chr19	58637618	58666477	-	ZSCAN18	no
MF	ZNF331	chr19	54024176	54083523	+
MF	ZNF346	chr5	176449696	176508190	+	FGFR4	no
MF	ZNF43	chr19	21987750	22034870	-	ZNF100	no
MF	ZNF608	chr5	123972609	124084500	-
MF	ZNF682	chr19	20115226	20150277	-
MF	ZNF684	chr1	40997232	41013841	+

## Sheet: D
SampleName	geneName	Chrom	lxStart	lxEnd	Strand
786O_KO	ABLIM3	chr5	148521045	148640001	+
786O_KO	AES	chr19	3052907	3062964	-
786O_KO	ALAD	chr9	116148591	116163618	-
786O_KO	ALDH18A1	chr10	97365685	97416567	-
786O_KO	ANP32E	chr1	150190716	150208504	-
786O_KO	API5	chr11	43333504	43366080	+
786O_KO	ARFGAP3	chr22	43192531	43253408	-
786O_KO	ARHGAP12	chr10	32094325	32217804	-
786O_KO	ARHGAP23	chr17	36584719	36668628	+
786O_KO	B3GNT7	chr2	232260334	232265875	+
786O_KO	BANP	chr16	87984237	88110924	+
786O_KO	BAZ1A	chr14	35221936	35344853	-
786O_KO	BCL7B	chr7	72950682	72972065	-
786O_KO	BLOC1S6	chr15	45879416	45901909	+
786O_KO	BNIP3L	chr8	26240522	26270644	+
786O_KO	BPTF	chr17	65821779	65980494	+
786O_KO	C11orf30	chr11	76156068	76263943	+
786O_KO	C14orf2	chr14	104378624	104387903	-
786O_KO	C1orf216	chr1	36179476	36184790	-
786O_KO	C2CD4C	chr19	405442	409170	-
786O_KO	C2orf27B	chr2	132552533	132559234	-
786O_KO	CAMK2N1	chr1	20808883	20812728	-
786O_KO	CAMSAP1	chr9	138700332	138799005	-
786O_KO	CARS	chr11	3022151	3078681	-
786O_KO	CCBE1	chr18	57098170	57364644	-
786O_KO	CCNY	chr10	35535908	35861598	+
786O_KO	CCSAP	chr1	229456751	229478688	-
786O_KO	CD83	chr6	14117486	14137148	+
786O_KO	CDH6	chr5	31193761	31329253	+
786O_KO	CHCHD6	chr3	126423062	126679263	+
786O_KO	CMAS	chr12	22199109	22218606	+
786O_KO	COIL	chr17	55015560	55038411	-
786O_KO	COPS4	chr4	83956238	83996971	+
786O_KO	COTL1	chr16	84599203	84651702	-
786O_KO	CPEB4	chr5	173315330	173387313	+
786O_KO	CREBBP	chr16	3775055	3930121	-
786O_KO	CTGF	chr6	132269316	132272518	-
786O_KO	DAD1	chr14	23033806	23058143	-
786O_KO	DAPK1	chr9	90112142	90323549	+
786O_KO	DGKH	chr13	42614171	42830716	+
786O_KO	DIEXF	chr1	210001311	210030910	+
786O_KO	DNAJB6	chr7	157129709	157210133	+
786O_KO	DTNB	chr2	25600066	25896516	-
786O_KO	DYSF	chr2	71680752	71913893	+
786O_KO	EBAG9	chr8	110551928	110578225	+
786O_KO	EEF2K	chr16	22217591	22300066	+
786O_KO	ELAVL1	chr19	8023456	8070529	-
786O_KO	ENAH	chr1	225674533	225840845	-
786O_KO	EPG5	chr18	43427573	43547305	-
786O_KO	EPS15	chr1	51819934	51984995	-
786O_KO	ETF1	chr5	137841781	137878989	-
786O_KO	FAM109A	chr12	111798454	111806925	-
786O_KO	FAM35BP	chr10	46897640	46939145	+
786O_KO	FAM46A	chr6	82455446	82462428	-
786O_KO	FAM72B	chr1	120839004	120855681	+
786O_KO	FAM73B	chr9	131798922	131834351	+
786O_KO	FAXC	chr6	99720792	99797531	-
786O_KO	FERMT2	chr14	53323988	53417815	-
786O_KO	FGFBP3	chr10	93666344	93669258	-
786O_KO	FKTN	chr9	108320410	108403399	+
786O_KO	FLYWCH1	chr16	2961979	3001209	+
786O_KO	FNDC3A	chr13	49550047	49783915	+
786O_KO	FOXA1	chr14	38058756	38064325	-
786O_KO	GATAD2A	chr19	19496641	19619741	+
786O_KO	GBAS	chr7	56032269	56067875	+
786O_KO	GBX2	chr2	237074306	237076652	-
786O_KO	GEM	chr8	95261484	95274547	-
786O_KO	GFRA1	chr10	117816441	118033126	-
786O_KO	GLI2	chr2	121554866	121750229	+
786O_KO	GLTP	chr12	110288747	110318293	-
786O_KO	GMFB	chr14	54941208	54955744	-
786O_KO	GOLGA4	chr3	37284681	37408370	+
786O_KO	GOT2	chr16	58741034	58768261	-
786O_KO	GPCPD1	chr20	5525079	5591672	-
786O_KO	GPT2	chr16	46918307	46965201	+
786O_KO	GTF2IRD2_2	chr7	74210482	74267872	-
786O_KO	GUCY1A3	chr4	156587861	156658214	+
786O_KO	H6PD	chr1	9294862	9331394	+
786O_KO	HCG27_1	chr6	31165536	31171745	+
786O_KO	HELZ	chr17	65066553	65241319	-
786O_KO	HERC2P9	chr15	28899587	28930410	+
786O_KO	IFI16	chr1	158979681	159024945	+
786O_KO	IFT88	chr13	21141207	21265576	+
786O_KO	IL4R	chr16	27325229	27376099	+
786O_KO	INO80	chr15	41267987	41408444	-
786O_KO	INTS10	chr8	19674917	19709586	+
786O_KO	IQGAP1	chr15	90931472	91045475	+
786O_KO	ISL2	chr15	76629146	76634816	+
786O_KO	ITIH5	chr10	7601231	7708961	-
786O_KO	ITSN2	chr2	24425734	24583397	-
786O_KO	IVD	chr15	40697685	40713512	+
786O_KO	KAT6A	chr8	41786996	41909505	-
786O_KO	KDM6A	chrX	44732420	44971857	+
786O_KO	KIAA2018	chr3	113367232	113415493	-
786O_KO	KIF21A	chr12	39687029	39837192	-
786O_KO	KLF4	chr9	110247132	110252047	-
786O_KO	LAMP2	chrX	119560002	119603204	-
786O_KO	LAP3	chr4	17578926	17609590	+
786O_KO	LATS1	chr6	149979288	150039392	-
786O_KO	LINC00263	chr10	102133332	102148111	+
786O_KO	LINC00674	chr17	66097695	66132070	+
786O_KO	LSM4	chr19	18417039	18434001	-
786O_KO	MAP3K7	chr6	91223291	91297020	-
786O_KO	MAPK9	chr5	179660594	179719071	-
786O_KO	MAPKAP1	chr9	128199672	128469513	-
786O_KO	MB21D2	chr3	192514604	192635950	-
786O_KO	MCCC1	chr3	182733005	182817375	-
786O_KO	MED30	chr8	118532951	118552501	+
786O_KO	MLLT1	chr19	6210391	6279959	-
786O_KO	MTM1	chrX	149737046	149841616	+
786O_KO	MTMR12	chr5	32227110	32313114	-
786O_KO	NBAS	chr2	15307031	15701472	-
786O_KO	NEDD4L	chr18	55711609	56068772	+
786O_KO	NFIC	chr19	3359560	3469215	+
786O_KO	NFKB1	chr4	103422485	103538459	+
786O_KO	NLK	chr17	26369687	26523404	+
786O_KO	NUDT12	chr5	102884555	102898502	-
786O_KO	NXNL2	chr9	91150015	91190704	+
786O_KO	OAF	chr11	120081746	120100650	+
786O_KO	OCIAD1	chr4	48833059	48863834	+
786O_KO	PAPD5	chr16	50186828	50269219	+
786O_KO	PAPOLG	chr2	60983364	61029221	+
786O_KO	PARD6B	chr20	49348080	49370278	+
786O_KO	PARP14	chr3	122399671	122449687	+
786O_KO	PCOLCE2	chr3	142536701	142608045	-
786O_KO	PDE10A	chr6	165740775	166075588	-
786O_KO	PDK3	chrX	24483343	24568583	+
786O_KO	PDP2	chr16	66914382	66925002	+
786O_KO	PHF6	chrX	133507341	133562822	+
786O_KO	PIF1	chr15	65107828	65117867	-
786O_KO	PKD2	chr4	88928798	88998931	+
786O_KO	PLRG1	chr4	155456148	155471585	-
786O_KO	PPAPDC3	chr9	134165080	134184649	+
786O_KO	PRDX4	chrX	23685644	23704514	+
786O_KO	PRR14	chr16	30662240	30667734	+
786O_KO	PTPN13	chr4	87515467	87736328	+
786O_KO	PTPRE	chr10	129705324	129884164	+
786O_KO	PTPRK	chr6	128289923	128841870	-
786O_KO	PTTG1IP	chr21	46269499	46293818	-
786O_KO	RAB27A	chr15	55495163	55582013	-
786O_KO	RAB6A	chr11	73386682	73472201	-
786O_KO	RASD2	chr22	35937351	35950045	+
786O_KO	RCC2	chr1	17733250	17766250	-
786O_KO	RLF	chr1	40627040	40706593	+
786O_KO	RNF111	chr15	59279864	59389618	+
786O_KO	RNF8	chr6	37321747	37362514	+
786O_KO	RP2	chrX	46696346	46741791	+
786O_KO	SALL1	chr16	51169885	51185183	-
786O_KO	SEL1L3	chr4	25749048	25865217	-
786O_KO	SENP6	chr6	76311621	76427994	+
786O_KO	SEPHS1	chr10	13359437	13390298	-
786O_KO	SF3A3	chr1	38422651	38455761	-
786O_KO	SIKE1	chr1	115312104	115323308	-
786O_KO	SIPA1L2	chr1	232533711	232651243	-
786O_KO	SKI	chr1	2160133	2241652	+
786O_KO	SKIL	chr3	170075472	170114637	+
786O_KO	SLC26A2	chr5	149340299	149366963	+
786O_KO	SLC41A1	chr1	205758220	205782161	-
786O_KO	SLC45A1	chr1	8378144	8404227	+
786O_KO	SLC45A4	chr8	142217264	142264728	-
786O_KO	SMYD3	chr1	245912641	246670644	-
786O_KO	SNAI2	chr8	49830238	49833999	-
786O_KO	SOS1	chr2	39208689	39351486	-
786O_KO	SPAG9	chr17	49039534	49198226	-
786O_KO	SPRY2	chr13	80910111	80915086	-
786O_KO	SPTSSA	chr14	34902143	34931468	-
786O_KO	ST3GAL1	chr8	134467090	134584183	-
786O_KO	STARD3NL	chr7	38217807	38270272	+
786O_KO	STK10	chr5	171469073	171615346	-
786O_KO	STK39	chr2	168810529	169104105	-
786O_KO	STK40	chr1	36805219	36851528	-
786O_KO	STX12	chr1	28099693	28150963	+
786O_KO	SUPV3L1	chr10	70939992	70968849	+
786O_KO	SYF2	chr1	25548766	25559013	-
786O_KO	TARBP1	chr1	234527058	234614849	-
786O_KO	TCAIM	chr3	44379610	44450940	+
786O_KO	TCEAL8	chrX	102507922	102510121	-
786O_KO	TDRD3	chr13	60970590	61148013	+
786O_KO	TEP1	chr14	20833825	20881579	-
786O_KO	TFDP2	chr3	141663269	141868386	-
786O_KO	TFPI	chr2	188328957	188419219	-
786O_KO	THUMPD1	chr16	20744985	20753199	-
786O_KO	TIMM17A	chr1	201924618	201939789	+
786O_KO	TLE4	chr9	82186687	82341796	+
786O_KO	TMSB4X	chrX	12993225	12995346	+
786O_KO	TNFRSF10D	chr8	22993100	23021543	-
786O_KO	TNRC6A	chr16	24741048	24837547	+
786O_KO	TRABD2B	chr1	48226199	48462562	-
786O_KO	TRIM21	chr11	4406126	4414926	-
786O_KO	TTC12	chr11	113185250	113244018	+
786O_KO	UBLCP1	chr5	158690088	158713048	+
786O_KO	UGGT2	chr13	96453835	96705736	-
786O_KO	UPP1	chr7	48128199	48148330	+
786O_KO	USP9X	chrX	40944887	41095832	+
786O_KO	VPS53	chr17	411907	618096	-
786O_KO	YTHDC2	chr5	112849390	112930984	+
786O_KO	ZBTB34	chr9	129622943	129648156	+
786O_KO	ZBTB38	chr3	141043054	141168632	+
786O_KO	ZC3H7A	chr16	11844441	11891114	-
786O_KO	ZC3HC1	chr7	129658125	129691291	-
786O_KO	ZCCHC5	chrX	77911565	77914825	-
786O_KO	ZHX2	chr8	123793900	123986755	+
786O_KO	ZIC2	chr13	100634025	100639019	+
786O_KO	ZNF133	chr20	18268926	18297640	+
786O_KO	ZNF138	chr7	64254765	64314178	+
786O_KO	ZNF18	chr17	11880761	11900689	-
786O_KO	ZNF264	chr19	57702867	57734214	+
786O_KO	ZNF346	chr5	176449696	176508190	+
786O_KO	ZNF592	chr15	85291817	85349663	+
786O_KO	ZNF599	chr19	35248978	35264134	-
786O_KO	ZNF805	chr19	57752052	57774106	+
786O_KO	ZYG11B	chr1	53192130	53293013	+

## Sheet: E
SampleName	geneName	Chrom	lxStart	lxEnd	Strand	Downstream_Tandem_Gene	Expression_Interfered
siSETD2	ADCY9	chr16	4012649	4166186	-	LOC102724927	no
siSETD2	AGPAT6	chr8	41435706	41482520	+
siSETD2	AGTRAP	chr1	11796141	11810828	+	C1orf167	no
siSETD2	AHCYL1	chr1	110527386	110566364	+	STRIP1	no
siSETD2	ALKBH8	chr11	107373452	107436461	-	CWF19L2	no
siSETD2	ALPK2	chr18	56148481	56296189	-
siSETD2	AMPD2	chr1	110162434	110174677	+	GSTM4	no
siSETD2	ANP32E	chr1	150190716	150208504	-
siSETD2	ARF6	chr14	50359735	50363772	+
siSETD2	ARHGAP29	chr1	94615402	94740624	-	ABCA4	no
siSETD2	ATAD2B	chr2	23971533	24149984	-
siSETD2	ATF1	chr12	51157788	51214943	+	TMPRSS12	yes
siSETD2	ATF7IP2	chr16	10479911	10577495	+
siSETD2	ATP9B	chr18	76829396	77138282	+	NFATC1	no
siSETD2	BBX	chr3	107241782	107530176	+
siSETD2	BNC1	chr15	83924654	83953468	-	HDGFRP3	no
siSETD2	BRWD3	chrX	79924986	80065233	-
siSETD2	C10orf88	chr10	124690418	124713919	-
siSETD2	C17orf58	chr17	65987214	65989765	-
siSETD2	C19orf12	chr19	30189792	30206696	-
siSETD2	C1orf159	chr1	1017197	1051736	-	RNF223	no
siSETD2	CASC4	chr15	44580908	44707959	+	CTDSPL2	no
siSETD2	CCBE1	chr18	57098170	57364644	-	LMAN1	no
siSETD2	CCDC93	chr2	118673053	118771739	-
siSETD2	CCNY	chr10	35535908	35861598	+	GJD4	yes
siSETD2	CCSER2	chr10	86088344	86278277	+	Mir_544_6	no
siSETD2	CDH6	chr5	31193761	31329253	+
siSETD2	CDK14	chr7	90095737	90839905	+	FZD1	no
siSETD2	CDK20	chr9	90581358	90589695	-	DQ596352_2	no
siSETD2	CDK5RAP1	chr20	31946644	31989375	-
siSETD2	CDK5RAP2	chr9	123151146	123342448	-	TRNA_67	no
siSETD2	CEP120	chr5	122680578	122759286	-
siSETD2	CEP170B	chr14	105331649	105363107	+	PLD4	no
siSETD2	CHCHD6	chr3	126423062	126679263	+	PLXNA1	no
siSETD2	CHD1L	chr1	146714290	146767447	+
siSETD2	CHRAC1	chr8	141521396	141527252	+
siSETD2	CLEC11A	chr19	51226604	51228981	+	GPR32	yes
siSETD2	CLEC2D	chr12	9822303	9852151	+
siSETD2	CLK4	chr5	178029664	178054054	-	COL23A1	no
siSETD2	CNIH4	chr1	224544512	224567153	+
siSETD2	CNOT10	chr3	32726636	32815367	+	TRIM71	yes
siSETD2	CNOT8	chr5	154237808	154256352	+
siSETD2	COX19	chr7	1004485	1015235	-	ADAP1	no
siSETD2	CTHRC1	chr8	104383742	104395232	+
siSETD2	CTNNBL1	chr20	36322356	36500531	+	VSTM2L	no
siSETD2	CUL2	chr10	35297478	35379570	-
siSETD2	CUL3	chr2	225334866	225450114	-	FAM124B	yes
siSETD2	DAPK1	chr9	90112142	90323549	+	CTSL1	no
siSETD2	DCUN1D5	chr11	102921412	102962944	-	MMP13	no
siSETD2	DDX3X	chrX	41192650	41209524	+	NYX	no
siSETD2	DERL1	chr8	124025403	124054663	-
siSETD2	DHX9	chr1	182808438	182857117	+
siSETD2	DIEXF	chr1	210001311	210030910	+	SYT14	no
siSETD2	DNAJB6	chr7	157129709	157210133	+	LOC101927914	no
siSETD2	DNAJC13	chr3	132136552	132257876	+
siSETD2	DPY19L2P2	chr7	102815461	102920913	-	NAPEPLD	no
siSETD2	DUSP12	chr1	161719580	161726952	+	ATF6	no
siSETD2	DYNC2H1	chr11	102980159	103350591	+	MIR4693	no
siSETD2	ELN	chr7	73442118	73484236	+	LIMK1	no
siSETD2	EPS15	chr1	51819934	51984995	-	TTC39A	yes
siSETD2	ESD	chr13	47345390	47371367	-
siSETD2	EVI5	chr1	92974252	93257961	-	GFI1	no
siSETD2	FAH	chr15	80445130	80478924	+
siSETD2	FAM200B	chr4	15683351	15692070	+	BST1	no
siSETD2	FAM222B	chr17	27082995	27169857	-
siSETD2	FAM46A	chr6	82455446	82462428	-
siSETD2	FAT4	chr4	126237566	126414087	+	MIR2054	no
siSETD2	FBLIM1	chr1	16083153	16113084	+
siSETD2	FBN1	chr15	48700502	48937985	-
siSETD2	FBXO28	chr1	224301788	224349749	+	DEGS1	no
siSETD2	FBXO33	chr14	39865576	39901704	-
siSETD2	FBXW11	chr5	171288555	171433877	-
siSETD2	FLRT2	chr14	85996487	86094270	+	LOC101928767	no
siSETD2	FZD6	chr8	104310660	104345094	+	CTHRC1	no
siSETD2	GAB1	chr4	144257982	144395718	+	SMARCA5	no
siSETD2	GABARAPL2	chr16	75600248	75611779	+
siSETD2	GEM	chr8	95261484	95274547	-	CDH17	no
siSETD2	GGH	chr8	63927638	63951610	-
siSETD2	GJA1	chr6	121756722	121770890	+	HSF2	no
siSETD2	GLIPR2	chr9	36136532	36163910	+	CCIN	no
siSETD2	GLTP	chr12	110288747	110318293	-
siSETD2	GLTSCR1	chr19	48111452	48206534	+	EHD2	no
siSETD2	GLUL	chr1	182350838	182361341	-	LINC01344	no
siSETD2	GMFB	chr14	54941208	54955744	-	CNIH	no
siSETD2	GNS	chr12	65107221	65153226	-
siSETD2	GOLGA5	chr14	93260575	93306306	+	CHGA	yes
siSETD2	GPAM	chr10	113909621	113943537	-
siSETD2	GRSF1	chr4	71681498	71705627	-
siSETD2	GSTP1	chr11	67351065	67354124	+
siSETD2	GTF2A2	chr15	59930260	59949737	-
siSETD2	HELZ	chr17	65066553	65241319	-
siSETD2	HES1	chr3	193853930	193856401	+
siSETD2	HIC2	chr22	21771692	21805750	+	TMEM191C	no
siSETD2	HINT1	chr5	130494975	130501041	-
siSETD2	HMG20B	chr19	3572942	3579081	+	GIPC3	no
siSETD2	HS6ST1	chr2	129023053	129076171	-
siSETD2	HSPH1	chr13	31709110	31736525	-
siSETD2	IFT81	chr12	110562139	110656600	+	ATP2A2	no
siSETD2	IMPACT	chr18	22006608	22033494	+	HRH4	no
siSETD2	IPO5	chr13	98605928	98676550	+	FARP1	no
siSETD2	IPO8	chr12	30781914	30848929	-	TMTC1	yes
siSETD2	IQGAP1	chr15	90931472	91045475	+	CRTC3	no
siSETD2	IREB2	chr15	78730517	78793798	+	AGPHD1	yes
siSETD2	IRF2BP2	chr1	234740014	234745271	-	LOC100506795	no
siSETD2	ITPR2	chr12	26488284	26986131	-
siSETD2	IVD	chr15	40697685	40713512	+	BAHD1	no
siSETD2	KCNG1	chr20	49620192	49639675	-
siSETD2	KDM6A	chrX	44732420	44971857	+
siSETD2	KIAA1456	chr8	12803150	12889012	+
siSETD2	KIAA2013	chr1	11979644	11986485	-	NPPB	no
siSETD2	KLF5	chr13	73629113	73651680	+	LINC00392	no
siSETD2	KLHL24	chr3	183353410	183402304	+	YEATS2	no
siSETD2	KLHL8	chr4	88081255	88141760	-
siSETD2	LAMA1	chr18	6941742	7117813	-	LINC00668	no
siSETD2	LATS2	chr13	21547175	21635722	-	LINC00367	no
siSETD2	LIMCH1	chr4	41361623	41702061	+
siSETD2	LOC100294145_1	chr6	32861952	32871535	+
siSETD2	LSM4	chr19	18417039	18434001	-
siSETD2	MAP2K5	chr15	67835020	68099455	+	SKOR1	yes
siSETD2	MBIP	chr14	36767763	36789882	-	PTCSC3	yes
siSETD2	MBTPS1	chr16	84087365	84150548	-	SLC38A8	no
siSETD2	MCM3	chr6	52128811	52149679	-	IL17F	no
siSETD2	ME1	chr6	83920109	84140938	-
siSETD2	MKRN1	chr7	140152839	140179369	-
siSETD2	MLLT1	chr19	6210391	6279959	-
siSETD2	MRFAP1	chr4	6641817	6644470	+	LOC93622	no
siSETD2	MRFAP1L1	chr4	6709428	6711606	-
siSETD2	MRPL1	chr4	78783804	78873944	+	FRAS1	no
siSETD2	MRPL11	chr11	66202545	66206319	-
siSETD2	MRPL4	chr19	10362639	10370736	+	ICAM1	no
siSETD2	MRPS31P5	chr13	52741844	52768602	-	NEK3	no
siSETD2	MSX1	chr4	4861391	4865660	+
siSETD2	MTMR6	chr13	25820340	25861704	-
siSETD2	MYSM1	chr1	59120410	59165747	-	TACSTD2	no
siSETD2	NCAPH	chr2	97001478	97042833	+
siSETD2	NEIL2	chr8	11627171	11644854	+	FDFT1	no
siSETD2	NFKBIA	chr14	35870715	35873960	-
siSETD2	NFX1	chr9	33290417	33371155	+
siSETD2	NFYB	chr12	104510857	104532040	-
siSETD2	NGDN	chr14	23938897	23947402	+	THTPA	no
siSETD2	NINJ1	chr9	95883770	95896570	-
siSETD2	NLK	chr17	26369687	26523404	+	PYY2	yes
siSETD2	NRIP1	chr21	16333555	16438231	-	LOC388813	no
siSETD2	NRN1	chr6	5998232	6007838	-
siSETD2	NUDT19	chr19	33182866	33204702	+	TDRD12	yes
siSETD2	NUP93	chr16	56764016	56878861	+	MIR138-2	no
siSETD2	NUPL1	chr13	25875665	25916561	+	ATP8A2	no
siSETD2	OAF	chr11	120081746	120100650	+	POU2F3	no
siSETD2	OAT	chr10	126085871	126107545	-	CHST15	no
siSETD2	OCIAD1	chr4	48833059	48863834	+
siSETD2	ORC5	chr7	103766787	103848495	-	RELN	yes
siSETD2	OSGIN2	chr8	90914095	90940095	+
siSETD2	OTUD3	chr1	20208887	20239437	+
siSETD2	OXR1	chr8	107282405	107764921	+
siSETD2	OXSR1	chr3	38207025	38296979	+	SLC22A13	yes
siSETD2	PABPC4L	chr4	135117488	135122903	-
siSETD2	PAPD5	chr16	50186828	50269219	+	ADCY7	no
siSETD2	PAQR8	chr6	52226925	52272575	+	EFHC1	no
siSETD2	PARP14	chr3	122399671	122449687	+
siSETD2	PARP16	chr15	65550436	65579018	-	CILP	yes
siSETD2	PCNX	chr14	71374121	71582099	+	SNORD56B	no
siSETD2	PDP2	chr16	66914382	66925002	+
siSETD2	PGM2L1	chr11	74041360	74109502	-
siSETD2	PGRMC1	chrX	118370207	118378429	+	LOC101928336	no
siSETD2	PHF14	chr7	11013498	11209250	+
siSETD2	PHLPP1	chr18	60382671	60647676	+
siSETD2	PIK3CB	chr3	138371539	138478201	-
siSETD2	PLD6	chr17	17104308	17109646	-
siSETD2	PLXNA1	chr3	126707436	126756235	+	C3orf56	no
siSETD2	PNPT1	chr2	55861197	55921045	-	SMEK2	no
siSETD2	PPAPDC3	chr9	134165080	134184649	+	PRRC2B	no
siSETD2	PPIF	chr10	81107219	81115089	+
siSETD2	PPP1R21	chr2	48667907	48742531	+	STON1-GTF2A1L	yes
siSETD2	PPP2CB	chr8	30643125	30670352	-
siSETD2	PRELID2	chr5	145135906	145214932	-
siSETD2	PREP	chr6	105725441	105850999	-	POPDC3	no
siSETD2	PRKCD	chr3	53195222	53226733	+
siSETD2	PSMB6	chr17	4699438	4701798	+	PLD2	no
siSETD2	PTPN21	chr14	88932121	89021123	-
siSETD2	PWWP2A	chr5	159502891	159546452	-
siSETD2	RAB27A	chr15	55495163	55582013	-	RSL24D1	no
siSETD2	RAPGEF3	chr12	48128452	48152889	-	ENDOU	no
siSETD2	RARS	chr5	167913462	167946309	+	FBLL1	no
siSETD2	RBBP6	chr16	24550907	24584183	+
siSETD2	RCOR3	chr1	211432707	211489725	+	TRAF5	no
siSETD2	REST	chr4	57774041	57802010	+
siSETD2	RHBDD2	chr7	75508316	75518244	+	POR	no
siSETD2	RMI2	chr16	11439310	11445617	+
siSETD2	RNF138	chr18	29671817	29711524	+	MEP1B	no
siSETD2	RNF38	chr9	36336398	36401195	-	GNE	no
siSETD2	RNF4	chr4	2470794	2517586	+	FAM193A	no
siSETD2	RNF8	chr6	37321747	37362514	+	CMTR1	no
siSETD2	RNGTT	chr6	89319615	89673348	-	LOC101928936	no
siSETD2	RPRD1A	chr18	33569791	33647373	-
siSETD2	RPS19BP1	chr22	39925097	39928860	-
siSETD2	RPS6KA3	chrX	20168028	20285523	-	EIF1AX	no
siSETD2	RRAGB	chrX	55744109	55785207	+	KLF8	no
siSETD2	RRP15	chr1	218458628	218511325	+
siSETD2	SAE1	chr19	47634079	47713893	+
siSETD2	SAMD9L	chr7	92759367	92777680	-	SAMD9	no
siSETD2	SAP130	chr2	128698790	128785633	-	DL490450	no
siSETD2	SAYSD1	chr6	39071839	39082865	-
siSETD2	SBNO1	chr12	123773655	123834988	-	CDK2AP1	no
siSETD2	SCAF11	chr12	46312913	46384401	-
siSETD2	SDC2	chr8	97505881	97624037	+	CPQ	no
siSETD2	SDE2	chr1	226170402	226187066	-	LEFTY2	no
siSETD2	SDHB	chr1	17345224	17380665	-	ATP13A2	no
siSETD2	SEC22A	chr3	122920773	122992982	+
siSETD2	SEL1L	chr14	81937890	82000205	-	LOC100506700	no
siSETD2	SEMA4F	chr2	74881354	74910981	+	HK2	no
siSETD2	SERPINE2	chr2	224839764	224904036	-
siSETD2	SERTAD1	chr19	40928408	40931932	-	PRX	no
siSETD2	SFSWAP	chr12	132195631	132284283	+	MMP17	no
siSETD2	SGMS2	chr4	108745720	108836204	+	CYP2U1	no
siSETD2	SGPP1	chr14	64150934	64194756	-	WDR89	no
siSETD2	SHQ1	chr3	72798427	72897598	-	RYBP	no
siSETD2	SIGMAR1	chr9	34634718	34637823	-	ARID3C	no
siSETD2	SKI	chr1	2160133	2241652	+
siSETD2	SLAIN2	chr4	48343612	48428215	+	SLC10A4	no
siSETD2	SLC2A3	chr12	8071823	8088892	-
siSETD2	SLC35C1	chr11	45825622	45834567	+	CRY2	no
siSETD2	SLC4A3	chr2	220492291	220506702	+
siSETD2	SNAI1	chr20	48599512	48605420	+
siSETD2	SNX12	chrX	70256097	70293276	-	SLC7A3	no
siSETD2	SNX13	chr7	17830384	17980131	-	LOC101927630	no
siSETD2	SOAT1	chr1	179262848	179327814	+	AXDND1	no
siSETD2	SOS1	chr2	39208689	39351486	-
siSETD2	SPTSSA	chr14	34902143	34931468	-	EGLN3	no
siSETD2	SRGN	chr10	70847827	70864567	+	VPS26A	no
siSETD2	ST6GAL1	chr3	186648314	186796341	+
siSETD2	STARD3NL	chr7	38217807	38270272	+
siSETD2	STK17B	chr2	196998306	197041227	-	DNAH7	yes
siSETD2	STK39	chr2	168810529	169104105	-
siSETD2	STK40	chr1	36805219	36851528	-
siSETD2	SUB1	chr5	32585604	32604185	+	NPR3	no
siSETD2	SUMO1	chr2	203070902	203103322	-
siSETD2	SUPV3L1	chr10	70939992	70968849	+
siSETD2	TACC1	chr8	38585703	38710546	+	PLEKHA2	no
siSETD2	TAF4	chr20	60549853	60640866	-	MIR1257	no
siSETD2	TAMM41	chr3	11831915	11888393	-	VGLL4	no
siSETD2	TBC1D13	chr9	131549485	131572711	+	ENDOG	no
siSETD2	TCAIM	chr3	44379610	44450940	+
siSETD2	TCEAL8	chrX	102507922	102510121	-
siSETD2	TCTN3	chr10	97423152	97453900	-	ALDH18A1	no
siSETD2	TEP1	chr14	20833825	20881579	-
siSETD2	TFRC	chr3	195776154	195809032	-	SDHAP1	no
siSETD2	TGDS	chr13	95226307	95248511	-	TRNA_7	no
siSETD2	THEM4	chr1	151843342	151882361	-	THEM5	no
siSETD2	TIAM1	chr21	32490735	32932290	-	KRTAP19-8	no
siSETD2	TINAGL1	chr1	32042085	32053287	+	HCRTR1	no
siSETD2	TMEM168	chr7	112402436	112430478	-
siSETD2	TMEM170A	chr16	75477141	75498584	-	CFDP1	no
siSETD2	TMEM2	chr9	74298281	74383800	-	TRPM3	yes
siSETD2	TMEM242	chr6	157710053	157745291	-
siSETD2	TMEM248	chr7	66386202	66423538	+
siSETD2	TMEM41B	chr11	9302200	9336315	-
siSETD2	TMEM87B	chr2	112812799	112876895	+	FBLN7	no
siSETD2	TNRC6B	chr22	40440820	40731812	+	ADSL	no
siSETD2	TOMM7	chr7	22852250	22862471	-
siSETD2	TOP2A	chr17	38544772	38574202	-	GJD3	no
siSETD2	TOX	chr8	59717976	60031767	-
siSETD2	TRAF6	chr11	36505316	36531863	-
siSETD2	TRPC1	chr3	142443265	142526729	+
siSETD2	TRPS1	chr8	116420723	116681255	-	CSMD3	no
siSETD2	TTC8	chr14	89290496	89344340	+	TRNA_Ala_5	no
siSETD2	TULP4	chr6	158733691	158932856	+	TMEM181	no
siSETD2	UBE4B	chr1	10093040	10241296	+	KIF1B	no
siSETD2	UBIAD1	chr1	11333254	11348491	+	PTCHD2	no
siSETD2	UFM1	chr13	38923907	38937144	+	LINC00366	no
siSETD2	USP10	chr16	84733554	84813527	+	CRISPLD2	no
siSETD2	USP33	chr1	78161673	78225564	-	ZZZ3	no
siSETD2	USP7	chr16	8985950	9057341	-	CARHSP1	no
siSETD2	USP9X	chrX	40944887	41095832	+	5S_rRNA_132	no
siSETD2	UTP11L	chr1	38478383	38490497	+
siSETD2	VAPA	chr18	9913954	9960018	+
siSETD2	VDAC3	chr8	42249278	42263455	+
siSETD2	WDR45B	chr17	80572437	80606411	-
siSETD2	WFS1	chr4	6271576	6304992	+
siSETD2	XPO6	chr16	28109297	28223239	-	GSG1L	yes
siSETD2	XPO7	chr8	21777179	21864096	+	NPM2	no
siSETD2	YAF2	chr12	42550906	42632154	-	GXYLT1	no
siSETD2	YES1	chr18	721591	812327	-	ENOSF1	no
siSETD2	YPEL5	chr2	30369749	30383399	+	LBH	no
siSETD2	YTHDF1	chr20	61826781	61847538	-
siSETD2	ZC3H7A	chr16	11844441	11891114	-	TXNDC11	no
siSETD2	ZC3HAV1	chr7	138728265	138794465	-	ZC3HAV1L	no
siSETD2	ZC3HC1	chr7	129658125	129691291	-
siSETD2	ZCCHC7	chr9	37120468	37358145	+	GRHPR	no
siSETD2	ZFP90	chr16	68573660	68601039	+	CDH3	yes
siSETD2	ZFPM2	chr8	106331146	106816767	+	OXR1	no
siSETD2	ZFYVE1	chr14	73436152	73493920	-
siSETD2	ZHX2	chr8	123793900	123986755	+
siSETD2	ZNF202	chr11	123594996	123612363	-	SCN3B	no
siSETD2	ZNF229	chr19	44930422	44952766	-	ZNF285	no
siSETD2	ZNF286A	chr17	15602890	15624100	+	TBC1D26	yes
siSETD2	ZNF331	chr19	54024176	54083523	+
siSETD2	ZNF346	chr5	176449696	176508190	+	FGFR4	no
siSETD2	ZNF362	chr1	33722173	33766320	+
siSETD2	ZNF444	chr19	56652534	56672262	+	GALP	no
siSETD2	ZNF627	chr19	11708234	11729974	+	ZNF833P	no
siSETD2	ZNF662	chr3	42947401	42960825	+
siSETD2	ZNF74	chr22	20748404	20762753	+
siSETD2	ZNF780A	chr19	40575058	40596845	-	ZNF780B	no
siSETD2	ZNF823	chr19	11832079	11849824	-
siSETD2	ZSCAN9	chr6	28193028	28201264	+

## Sheet: F
SampleName	geneName	Chrom	lxStart	lxEnd	Strand	Downstream_Tandem_Gene	Expression_Interfered
shSETD2_2	2410089E03Rik	chr15	8119105	8221158	+
shSETD2_2	Aatf	chr11	84236357	84327003	-
shSETD2_2	Actr2	chr11	19962306	20012954	-
shSETD2_2	Actr6	chr10	89174717	89195040	-
shSETD2_2	Adrb3	chr8	28336247	28340060	-	Got1l1	no
shSETD2_2	Agpat4	chr17	12312149	12412506	+
shSETD2_2	Aldh1l1	chr6	90500811	90549165	+
shSETD2_2	Aph1c	chr9	66662800	66682513	-	Aph1b	no
shSETD2_2	Arap2	chr5	62993684	63157416	-
shSETD2_2	Arl2	chr19	6134388	6141137	-	Snx15	no
shSETD2_2	Armc9	chr1	88051354	88174859	+
shSETD2_2	Arntl2	chr6	146754051	146782051	+
shSETD2_2	Atg14	chr14	48160567	48188109	-
shSETD2_2	Atp2c1	chr9	105313691	105423587	-
shSETD2_2	Atp5g3	chr2	73746503	73749383	-	Atf2	no
shSETD2_2	B4galnt4	chr7	148247172	148258018	+	Pkp3	no
shSETD2_2	Bcl6	chr16	23965137	23988698	-	Rtp2	no
shSETD2_2	Bend4	chr5	67783385	67819038	-
shSETD2_2	Blmh	chr11	76759157	76800891	+
shSETD2_2	Brpf3	chr17	28938070	28975734	+	Pnpla1	no
shSETD2_2	Btf3	chr13	99079851	99086961	-
shSETD2_2	Cabp1	chr5	115618699	115636130	-
shSETD2_2	Ccdc160	chrX	50144376	50152645	+
shSETD2_2	Cdkl2	chr5	92435099	92472068	-
shSETD2_2	Celf1	chr2	90780553	90859654	+	Rapsn	yes
shSETD2_2	Cggbp1	chr16	64851910	64859317	+
shSETD2_2	Chaf1b	chr16	93884145	93906351	+
shSETD2_2	Cisd2	chr3	135069375	135086397	-
shSETD2_2	Clint1	chr11	45665465	45724127	+
shSETD2_2	Clk1	chr1	58468831	58480932	-
shSETD2_2	Cndp2	chr18	84836856	84855094	-	Cndp1	no
shSETD2_2	Cops8	chr1	92499999	92509916	+
shSETD2_2	Ctu1	chr7	50927400	50933667	+
shSETD2_2	Cyb5b	chr8	109674560	109711370	+	Nfat5	yes
shSETD2_2	Cyct	chr2	76191998	76198510	-	Pde11a	no
shSETD2_2	D15Ertd621e	chr15	58247022	58289356	+
shSETD2_2	D1Ertd622e	chr1	99540478	99558595	-	Slco6c1	yes
shSETD2_2	D3Ertd254e	chr3	36050001	36069263	+
shSETD2_2	Dcaf11	chr14	56178865	56188902	+	Fitm1	yes
shSETD2_2	Dcaf12	chr4	41238332	41261934	-	Ubap2	no
shSETD2_2	Dck	chr5	89194037	89212302	+	Slc4a4	no
shSETD2_2	Dctd	chr8	49184445	49227021	+
shSETD2_2	Ddx47	chr6	134961629	134973794	+	Gprc5a	no
shSETD2_2	Depdc5	chr5	33206369	33336882	+	Ywhah	no
shSETD2_2	Dhx34	chr7	16782569	16807381	-
shSETD2_2	Dnajb1	chr8	86132073	86135802	+
shSETD2_2	Dnajc27	chr12	4082573	4110612	+	Adcy3	no
shSETD2_2	Dnmbp	chr19	43921308	44014688	-
shSETD2_2	Dpy19l3	chr7	36470518	36539473	-	Pdcd5	no
shSETD2_2	Dut	chr2	125072983	125084785	+
shSETD2_2	Dyx1c1	chr9	72806591	72820874	+
shSETD2_2	E2f3	chr13	29998443	30077932	-	Cdkal1	no
shSETD2_2	Ecel1	chr1	89044229	89052931	-
shSETD2_2	Eif2b2	chr12	86560462	86567578	+
shSETD2_2	Elovl2	chr13	41277750	41315772	-	Gcm2	yes
shSETD2_2	En2	chr5	28492235	28498706	+
shSETD2_2	Enpp4	chr17	44233258	44242757	-
shSETD2_2	Epcam	chr17	88035318	88050467	+
shSETD2_2	Fam135a	chr1	24017596	24107180	-	1110058L19Rik	no
shSETD2_2	Fam84a	chr12	14154403	14158844	-
shSETD2_2	Fbxo34	chr14	48092235	48151637	+
shSETD2_2	Fbxo42	chr4	140703836	140759977	+	Rsg1	no
shSETD2_2	Fgd5	chr6	91928871	92025999	+
shSETD2_2	Flnb	chr14	8650470	8784101	+
shSETD2_2	Frem2	chr3	53317859	53461277	-
shSETD2_2	Fstl1	chr16	37777140	37836602	+	Lrrc58	no
shSETD2_2	Gab1	chr8	83288329	83404418	-	Smarca5	no
shSETD2_2	Gdap1l1	chr2	163264202	163281060	+
shSETD2_2	Gkap1	chr13	58334711	58375549	-
shSETD2_2	Glce	chr9	61905055	61918413	-	Paqr5	no
shSETD2_2	Got1l1	chr8	28307930	28313019	-	Rab11fip1	no
shSETD2_2	Gpcpd1	chr2	132354817	132403984	-
shSETD2_2	Gpr3	chr4	132765254	132768451	-
shSETD2_2	Gtf2ird1	chr5	134833530	134932586	-	Gtf2i	no
shSETD2_2	Gulo	chr14	66605623	66628047	-
shSETD2_2	Habp4	chr13	64263173	64287845	+
shSETD2_2	Hcfc1	chrX	71188130	71211696	-	Renbp	no
shSETD2_2	Heatr5a	chr12	52976859	53072308	-
shSETD2_2	Hibadh	chr6	52496223	52590294	-
shSETD2_2	Hint1	chr11	54679939	54683998	+	Gpx3	no
shSETD2_2	Hnrnpd	chr5	100384953	100407957	-	A930011G23Rik	no
shSETD2_2	Hprt	chrX	50341254	50374837	+
shSETD2_2	Hrh3	chr2	179834169	179839112	-
shSETD2_2	Hspa4	chr11	53073315	53113981	-
shSETD2_2	Id2	chr12	25778663	25780957	-
shSETD2_2	Igbp1	chrX	97689629	97711464	+	Dgat2l6	no
shSETD2_2	Igfbp4	chr11	98902573	98913957	+
shSETD2_2	Il3ra	chr14	15179008	15188004	+	Slc4a7	no
shSETD2_2	Impdh1	chr6	29150439	29166350	-	Prrt4	yes
shSETD2_2	Ipo11	chr13	107584518	107726995	-
shSETD2_2	Kdm4c	chr4	73888400	74051768	+
shSETD2_2	Kif1b	chr4	148550427	148681842	-	Pgd	no
shSETD2_2	Lactb	chr9	66803199	66823291	-
shSETD2_2	Ldha	chr7	54101173	54110997	+	Ldhc	no
shSETD2_2	Lgals12	chr19	7671150	7681666	-
shSETD2_2	Lpin1	chr12	16542474	16596576	-
shSETD2_2	Lrrk2	chr15	91503654	91646555	+
shSETD2_2	Lyplal1	chr1	187911610	187941189	-
shSETD2_2	Magohb	chr6	131234406	131243262	-	Klra2	no
shSETD2_2	Map4k3	chr17	80979851	81127433	-
shSETD2_2	Max	chr12	78038255	78063235	-
shSETD2_2	Med10	chr13	69948759	69954972	+
shSETD2_2	Med13l	chr5	119010727	119215446	+
shSETD2_2	Melk	chr4	44313788	44377547	+
shSETD2_2	Mfsd1	chr3	67386689	67408153	+	Gm21949	no
shSETD2_2	Mgat1	chr11	49057692	49076526	+	Olfr1393	yes
shSETD2_2	Mier2	chr10	79002989	79017836	-
shSETD2_2	Mlf2	chr6	124881405	124887256	+
shSETD2_2	Mrpl42	chr10	94943439	94964561	-
shSETD2_2	Msx3	chr7	147232055	147234987	-
shSETD2_2	Mtx3	chr13	93614741	93628185	+
shSETD2_2	Myh9	chr15	77591014	77672605	-	Apol8	no
shSETD2_2	Mysm1	chr4	94608731	94645791	-	Eqtn	no
shSETD2_2	Nbas	chr12	13275932	13590617	+
shSETD2_2	Ndufa4	chr6	11850372	11857446	-
shSETD2_2	Nf2	chr11	4665847	4749547	-
shSETD2_2	Nfyb	chr10	82211444	82226886	-
shSETD2_2	Ngdn	chr14	55634290	55642974	+	Gm10364	no
shSETD2_2	Nob1	chr8	109936388	109948938	-	Nqo1	no
shSETD2_2	Nr4a1	chr15	101097276	101105225	+	Atg101	no
shSETD2_2	Nrf1	chr6	29997987	30103458	+
shSETD2_2	Nrtn	chr17	56890747	56896953	-
shSETD2_2	Ogdh	chr11	6191599	6259097	+	Zmiz2	no
shSETD2_2	Oprl1	chr2	181449720	181455690	+	Myt1	no
shSETD2_2	Oraov1	chr7	152101098	152107042	+
shSETD2_2	Parl	chr16	20279893	20302435	-
shSETD2_2	Parp11	chr6	127396857	127444257	+	Efcab4b	no
shSETD2_2	Parp6	chr9	59465090	59498097	+	Pkm	no
shSETD2_2	Pcmtd2	chr2	181572558	181592165	+	Polr3k	no
shSETD2_2	Pdcd6ip	chr9	113560861	113617377	-
shSETD2_2	Pdyn	chr2	129512284	129525674	-
shSETD2_2	Phf14	chr6	11875880	12031198	+
shSETD2_2	Phlda3	chr1	137662661	137665711	+	Tnni1	yes
shSETD2_2	Pipox	chr11	77694116	77707374	-
shSETD2_2	Plin2	chr4	86302468	86315963	-
shSETD2_2	Plk2	chr13	111185251	111191051	+
shSETD2_2	Plxna1	chr6	89266307	89312607	-
shSETD2_2	Plxna3	chrX	71574404	71590028	+
shSETD2_2	Pnrc1	chr4	33332397	33335762	-
shSETD2_2	Polr3b	chr10	84085181	84189923	+	Rfx4	no
shSETD2_2	Ppfia1	chr7	151662659	151739634	-	Cttn	no
shSETD2_2	Ppia	chr11	6315872	6319813	+
shSETD2_2	Ppp1r15b	chr1	135027742	135036377	+	Plekha6	yes
shSETD2_2	Ppp6r3	chr19	3454927	3575749	-
shSETD2_2	Prdx4	chrX	151758462	151772997	-
shSETD2_2	Psma6	chr12	56499811	56519446	+
shSETD2_2	Ptges3	chr10	127496037	127514310	+	Atp5b	no
shSETD2_2	Ptpn11	chr5	121580541	121641406	-	Rph3a	yes
shSETD2_2	Racgap1	chr15	99450926	99482087	-
shSETD2_2	Rangap1	chr15	81534677	81560349	-
shSETD2_2	Rcn2	chr9	55889651	55909689	+	Pstpip1	yes
shSETD2_2	Rft1	chr14	31467560	31504499	+	Sfmbt1	no
shSETD2_2	Rhov	chr2	119094936	119096962	-
shSETD2_2	Rnd3	chr2	50985958	51004631	-
shSETD2_2	Rnf19b	chr4	128735514	128761770	+	Tmem54	yes
shSETD2_2	Rnf7	chr9	96371375	96379014	-	Atp1b3	no
shSETD2_2	Rpl21	chr5	147644465	147648608	+	Rasl11a	no
shSETD2_2	Rpp30	chr19	36158205	36179263	+
shSETD2_2	Sbf2	chr7	117451526	117758434	-
shSETD2_2	Sema4f	chr6	82861878	82889744	-	2310069B03Rik	no
shSETD2_2	Sertad3	chr7	28258858	28262383	+	Sertad1	no
shSETD2_2	Sf3b1	chr1	55042012	55084322	-	Ankrd44	no
shSETD2_2	Sfswap	chr5	130007105	130077259	+	Mmp17	no
shSETD2_2	Sgpp1	chr12	76815234	76836716	-	Wdr89	no
shSETD2_2	Slc16a1	chr3	104442586	104462385	+
shSETD2_2	Slc25a20	chr9	108564428	108586972	+
shSETD2_2	Slc38a9	chr13	113450973	113528960	+
shSETD2_2	Slc43a1	chr2	84679564	84703743	+
shSETD2_2	Smarcal1	chr1	72629824	72683364	+
shSETD2_2	Socs5	chr17	87507018	87536925	+
shSETD2_2	Sparc	chr11	55207660	55233582	-	Fat2	no
shSETD2_2	Spc24	chr9	21559885	21564730	-
shSETD2_2	Srp68	chr11	116106479	116135531	-	Evpl	no
shSETD2_2	Srp9	chr1	184054867	184062546	+
shSETD2_2	Stac2	chr11	97897937	97914776	-
shSETD2_2	Stmn1	chr4	134024234	134029758	+	Paqr7	no
shSETD2_2	Stxbp3a	chr3	108596097	108643420	-
shSETD2_2	Tbc1d7	chr13	43247108	43266870	-
shSETD2_2	Tceal8	chrX	132703522	132706790	-
shSETD2_2	Tef	chr15	81633102	81657293	+
shSETD2_2	Tfdp1	chr8	13338750	13378448	+
shSETD2_2	Tfdp2	chr9	96096693	96224065	+
shSETD2_2	Thap1	chr8	27268640	27274623	+
shSETD2_2	Thoc7	chr14	14781525	14793827	-
shSETD2_2	Tjp1	chr7	72441050	72516130	-
shSETD2_2	Tle3	chr9	61220172	61266304	+
shSETD2_2	Tmem18	chr12	31269307	31276084	+
shSETD2_2	Tmem19	chr10	114777795	114799318	-
shSETD2_2	Tmpo	chr10	90610315	90634364	-
shSETD2_2	Tnfrsf1b	chr4	144802270	144836773	-	Vps13d	no
shSETD2_2	Tnrc6a	chr7	130267398	130338810	+	Slc5a11	no
shSETD2_2	Tomm5	chr4	45118081	45120985	-
shSETD2_2	Tpbg	chr9	85735986	85740662	+
shSETD2_2	Trappc6b	chr12	60144078	60162448	-
shSETD2_2	Trim8	chr19	46576137	46590945	+
shSETD2_2	Tspan13	chr12	36741141	36769065	-
shSETD2_2	Tspan33	chr6	29644213	29668558	+	Smo	yes
shSETD2_2	U2af1	chr17	31784026	31795699	-	Cbs	no
shSETD2_2	Ube2q1	chr3	89577530	89587919	+	She	no
shSETD2_2	Ube4b	chr4	148702524	148800740	-	Kif1b	no
shSETD2_2	Ubtf	chr11	102165873	102180410	-	Atxn7l3	no
shSETD2_2	Uchl3	chr14	102053183	102095342	+	Lmo7	no
shSETD2_2	Usp36	chr11	118120966	118151558	-	Cyth1	no
shSETD2_2	Utp6	chr11	79747457	79775889	-
shSETD2_2	Vma21	chrX	69061418	69070045	+
shSETD2_2	Wdr60	chr12	117445522	117501498	-
shSETD2_2	Wtip	chr7	34894566	34918287	-
shSETD2_2	Xrn2	chr2	146838795	146903733	+
shSETD2_2	Ythdc2	chr18	44988318	45049374	+	Kcnn2	no
shSETD2_2	Ythdf3	chr3	16083182	16117038	+	2610100L16Rik	no
shSETD2_2	Zfp248	chr6	118377336	118405524	-
shSETD2_2	Zfp280b	chr10	75495356	75505714	+
shSETD2_2	Zfp318	chr17	46520714	46557867	+	Crip3	yes
shSETD2_2	Zfp346	chr13	55206669	55236432	+	Fgfr4	yes
shSETD2_2	Zfp420	chr7	30644997	30662321	+
shSETD2_2	Zfp429	chr13	67490264	67500703	-	Zfp456	no
shSETD2_2	Zfp579	chr7	4944453	4947703	-
shSETD2_2	Zfp62	chr11	49017001	49032318	+	Mgat1	no
shSETD2_2	Zfp637	chr6	117791259	117795974	+	Zfp239	no
shSETD2_2	Zfp654	chr16	64780172	64786147	-	4930453N24Rik	no
shSETD2_2	Zfp706	chr15	36926781	36937157	-	Ywhaz	no
shSETD2_2	Zfp715	chr7	50551892	50568631	-
shSETD2_2	Zfp871	chr17	32902441	32925232	-
shSETD2_2	Zfp93	chr7	25055436	25062813	+
shSETD2_2	Zik1	chr7	11072572	11080730	-

## Sheet: G
Read-Through GeneName	Downstream GeneName	Correlation	B-H adj. p-value
APOL4	APOL3	0.526914511021937	8.45518087277952e-05
AQP1	GHRHR	0.50398002560226	0.000190454603183676
DBR1	A4GNT	0.448598062245108	0.00108551695939529
EGR3	BIN3	-0.437462738015102	0.00148889498006839
MGAM	LOC93432	0.502290259674403	0.000201742286894513
RARS	FBLL1	0.464682969196657	0.000674647102368642
STK11IP	SLC4A3	0.589176729634255	6.75447240361393e-06
THUMPD1	ACSM1	0.499847646555442	0.000219135976340379
UBE2J2	FAM132A	0.622492598002316	1.38899728385766e-06
ZNF418	ZNF417	0.600195069959829	4.0829936636122e-06
ZNF518B	WDR1	0.427509156661002	0.0019574318767297
ZNF671	ZNF154	0.706908582245344	9.6050838394035e-09
ZNF738	ZNF493	0.426689384402553	0.00200131221926125
DEPDC7	TCP11L1	0.557231863079757	2.63126183357443e-05
LRRC27	PWWP2B	0.488515315151158	0.000319053267719305
CLK4	COL23A1	0.440957395595273	0.00134987266796194
VAMP4	MYOC	0.415736831832552	0.00267729465800848
ATP2A3	P2RX1	0.510038839304384	0.000154543676945007
TBC1D23	NIT2	0.600435077771041	4.03762445988498e-06
ZNF302	ZNF181	0.425724811041631	0.00205406083342341
ZNF626	ZNF737	0.474110272004734	0.000504948428482699
ALAD	HDHD3	0.670820004366916	9.79736332062942e-08
FCHO2	TMEM171	0.532368085283424	6.91004098196668e-05
HAVCR2	HAVCR1	0.72836964530949	2.03272509935459e-09
DPEP2	DPEP3	0.477355130217001	0.000456137181319427
KDSR	BCL2	0.542083274623792	4.78157402592494e-05
WDFY1	AP1S3	0.445665962483202	0.00118091681319599
DES	SPEG	0.541330374639367	4.92198044736991e-05
SCNN1G	SCNN1B	0.474585307133081	0.000497520092339609
VPS53	FAM101B	0.452804482647553	0.000960694764150505
SPEF2	IL7R	0.42807792188229	0.00192749181139096
PIK3R5	PIK3R6	0.56467577995894	1.94086705036511e-05
SIGLEC9	SIGLEC7	0.503747585358158	0.000191972449064881
ATXN3	TRIP11	0.417349566367737	0.00256653807686913
C3	TNFSF14	0.495219527458978	0.000255876523814536
CD93	THBD	0.415448309160143	0.00269754916123821
FGG	FGA	0.51068506078246	0.000151102717157237
FNDC3A	MLNR	0.673158343712378	8.51119907885334e-08
ZNF775	LOC728743	0.620090038899399	1.56641905224575e-06
FAM107A	ACOX2	0.446236067662378	0.00116180079905437
IL1R2	IL1R1	0.425164713860962	0.00208525369471424
R3HDML	HNF4A	0.728293214041735	2.04452565988333e-09
MYOM1	LPIN2	0.428337365849866	0.0019139702718225
TMEM177	PTPN4	0.584567678366736	8.2923196749185e-06
EIF2B5	DVL3	0.426868019354579	0.00199167656635568
PGA3	PGA4	0.575548996411976	1.22774375928003e-05
EXPH5	KDELC2	0.474009041224142	0.000506544297198541
ZNF525	ZNF765	0.56161047199727	2.20194349782599e-05
RGS14	SLC34A1	0.482040099924156	0.000393163925368034
ZNF772	VN1R1	0.630763624608623	9.11121742053211e-07
PTPLA	ST8SIA6	0.435151841924271	0.00158770378107453
WNT9B	GOSR2	0.492209154315745	0.000282686952588262

## Sheet: H
SampleName	GeneNames_Gene1	GeneNames_Gene2	Chromosomes_Location	BreakPoint_Gene1	BreakPoint_Gene2	ReadsSpanningFusionBreak	MatePairsSupportingFusion	MatePairsSupportingFusionANDReadsSpanningFusion	ReadsContradictingFusion
TCGA-CW-6090-01A	FAM69A	RPL5	chr1-chr1	93299109	93297598	1	31	5	0
TCGA-CW-6090-01A	CTSC	RAB38	chr11-chr11	88033697	87883122	1	2	4	0
TCGA-CW-6090-01A	BICC1	ENSG00000237949	chr10-chr10	60580227	60760988	1	3	0	0
TCGA-CZ-5465-01A	LRRK1	CHSY1	chr15-chr15	101590983	101775286	3	4	5	1
TCGA-CZ-5465-01A	SPAG16	VWC2L	chr2-chr2	215110837	215300915	1	3	5	1
TCGA-CZ-5987-01A	EHHADH	EHHADH-AS1	chr3-chr3	184909766	184909645	1	6	1	12
TCGA-CZ-5984-01A	SLC16A12	LIPA	chr10-chr10	91222135	91007405	6	2	13	0
TCGA-CZ-5453-01A	LRRC8B	LRRC8C	chr1-chr1	90050347	90152028	2	3	3	0
TCGA-CZ-5453-01A	NME7	ATP1B1	chr1-chr1	169101980	169101944	1	34	0	47
TCGA-CZ-5453-01A	PALLD	CBR4	chr4-chr4	169815915	169923221	1	3	2	0
TCGA-CZ-5453-01A	KRBOX4	ZNF674	chrX-chrX	46331673	46360769	2	3	1	0
TCGA-CZ-5453-01A	SAMD5	SASH1	chr6-chr6	147830522	148711269	1	2	1	0
TCGA-CZ-5454-01A	PFKFB3	LOC399715	chr10-chr10	6268327	6368508	1	6	5	1
TCGA-CZ-5454-01A	CHST9	AQP4	chr18-chr18	24604079	24442559	1	6	1	0
TCGA-CZ-5454-01A	MBNL3	RAP2C	chrX-chrX	131563840	131352864	1	3	2	0
TCGA-B8-4620-01A	CTSC	RAB38	chr11-chr11	88033697	87883122	2	7	5	0
TCGA-CZ-5452-01A	PALLD	CBR4	chr4-chr4	169815915	169923221	4	5	9	0
TCGA-A3-3358-01A	TAF10	ILK	chr11-chr11	6632106	6632072	1	7	1	17
TCGA-A3-3358-01A	CTSC	RAB38	chr11-chr11	88033697	87883122	1	14	13	0
TCGA-B0-5705-01A	SAMD5	SASH1	chr6-chr6	147830522	148711269	1	4	0	0
TCGA-B0-5705-01A	LRRK1	CHSY1	chr15-chr15	101590983	101775286	1	2	1	0
TCGA-CJ-5681-01A	CR1	CR1L	chr1-chr1	207684998	207858527	5	26	3	1
TCGA-CJ-5681-01A	PALLD	CBR4	chr4-chr4	169815915	169923221	3	7	7	0
TCGA-CJ-5681-01A	SAMD5	SASH1	chr6-chr6	147830520	148711267	6	3	0	0
TCGA-CJ-5681-01A	PALM2-AKAP2	AKAP2	chr9-chr9	112778318	112898409	1	21	1	0
TCGA-CJ-5681-01A	LINC00189	BACH1	chr21-chr21	30566580	30693541	1	9	8	0
TCGA-B0-5711-01A	ENSG00000184432	MRPS22	chr3-chr3	139075939	139075834	1	4	1	10
TCGA-CZ-5986-01A	CTSC	RAB38	chr11-chr11	88033697	87883122	2	4	1	0
TCGA-CZ-5986-01A	SPAG16	VWC2L	chr2-chr2	215110837	215300915	5	2	2	0
TCGA-CZ-5470-01A	PALLD	CBR4	chr4-chr4	169815915	169923221	4	5	15	0
TCGA-CZ-5461-01A	CTSC	RAB38	chr11-chr11	88033697	87883122	3	10	8	0
TCGA-CZ-5461-01A	NNMT	RBM7	chr11-chr11	114168879	114272419	5	6	15	10
TCGA-CZ-5461-01A	LRRK1	CHSY1	chr15-chr15	101590983	101775286	1	2	4	0
TCGA-CZ-5461-01A	TVP23C	TVP23C-CDRT4	chr17-chr17	15449098	15341516	1	4	2	0
TCGA-CZ-5461-01A	CHST9	AQP4	chr18-chr18	24604079	24442559	1	3	3	0
TCGA-B0-5712-01A	BICC1	ENSG00000237949	chr10-chr10	60580227	60760988	1	5	2	2
TCGA-B0-5712-01A	PALLD	CBR4	chr4-chr4	169815915	169923221	1	8	4	0
TCGA-B0-5712-01A	FGFR1OP	CCR6	chr6-chr6	167447458	167549525	1	5	4	0
TCGA-CZ-5463-01A	CTSC	RAB38	chr11-chr11	88033697	87883122	4	6	3	0
TCGA-CZ-5463-01A	CHST9	AQP4	chr18-chr18	24604079	24442559	2	5	3	0
TCGA-CZ-5463-01A	ENSG00000259516	DPH6	chr15-chr15	35512782	35665721	1	2	0	1
TCGA-CZ-5463-01A	STARD4-AS1	NREP	chr5-chr5	110917159	111071126	3	5	5	4
TCGA-CZ-5463-01A	C7orf13	LINC01006	chr7-chr7	156433229	156265404	1	2	0	0
TCGA-CZ-5463-01A	MBNL3	RAP2C	chrX-chrX	131563840	131352864	1	3	1	0
TCGA-CZ-5469-01A	PALLD	CBR4	chr4-chr4	169815915	169923221	1	5	3	0
TCGA-B0-5402-01A	KRBOX4	ZNF674	chrX-chrX	46331577	46360769	3	2	0	5
TCGA-CW-6088-01A	SPAG16	VWC2L	chr2-chr2	215110837	215300915	3	5	4	0
TCGA-CW-6088-01A	PALLD	CBR4	chr4-chr4	169815915	169923221	2	3	5	0
TCGA-CW-6088-01A	CNKSR3	IPCEF1	chr6-chr6	154731476	154610889	2	2	2	0
TCGA-CW-6088-01A	FGFR1OP	CCR6	chr6-chr6	167447458	167549525	2	5	2	2
TCGA-CW-6088-01A	BICC1	ENSG00000237949	chr10-chr10	60580227	60760988	1	2	0	0
TCGA-CJ-6030-01A	FAM69A	RPL5	chr1-chr1	93299106	93297605	1	11	1	8
TCGA-CJ-6030-01A	CTSC	RAB38	chr11-chr11	88029300	87883122	1	7	1	0
TCGA-CZ-5462-01A	TVP23C	TVP23C-CDRT4	chr17-chr17	15449098	15341516	1	4	2	0
TCGA-CZ-5462-01A	C4BPA	CD55	chr1-chr1	207308124	207495030	1	2	0	0
TCGA-CZ-5468-01A	PALLD	CBR4	chr4-chr4	169815915	169923221	1	4	1	0
TCGA-CZ-4865-01A	ENSG00000259516	DPH6	chr15-chr15	35512782	35665721	2	2	3	1
TCGA-CZ-4864-01A	PFKFB3	LOC399715	chr10-chr10	6268327	6368508	1	2	1	3
TCGA-CZ-4864-01A	ENSG00000259516	DPH6	chr15-chr15	35512782	35665721	1	3	0	0
TCGA-A3-3387-01A	CTSC	RAB38	chr11-chr11	88033697	87883122	1	3	5	0
TCGA-A3-3387-01A	TVP23C	TVP23C-CDRT4	chr17-chr17	15443746	15343598	1	3	2	0
TCGA-CZ-5458-01A	PALLD	CBR4	chr4-chr4	169815915	169923221	1	3	3	0
TCGA-CJ-5680-01A	PALLD	CBR4	chr4-chr4	169815915	169923221	1	3	4	0
TCGA-CW-6087-01A	CR1	CR1L	chr1-chr1	207684998	207858527	3	2	5	0
TCGA-CW-6087-01A	CTSC	RAB38	chr11-chr11	88033697	87883122	4	13	12	0
TCGA-CW-6087-01A	LINC00189	BACH1	chr21-chr21	30566580	30693541	2	3	3	0
TCGA-CW-6087-01A	ERC2	WNT5A	chr3-chr3	55640807	55514945	1	2	0	0
TCGA-CW-6087-01A	CLVS1	ASPH	chr8-chr8	62250228	62593526	2	2	0	0
TCGA-B2-5636-01A	LRRK1	CHSY1	chr15-chr15	101590983	101775286	1	3	1	0
TCGA-CZ-5455-01A	CTSC	RAB38	chr11-chr11	88033697	87883122	3	16	7	0
TCGA-B8-4619-01A	DIP2C	PRR26	chr10-chr10	532469	699840	1	6	9	6
TCGA-B8-4619-01A	PACRG	PACRG-AS1	chr6-chr6	163483352	163735858	1	48	0	2
Caki1	MLX	PSMC3IP	chr17-chr17	40725130	40725381	1	18	1	28
Caki1	ELP2	MOCOS	chr18-chr18	33718813	33837013	71	43	130	13
Caki1	PALLD	CBR4	chr4-chr4	169815915	169923221	4	4	5	0
Caki2	LEPROT	LEPR	chr1-chr1	65895730	66031228	1	10	2	9
Caki2	SPAG17	WDR3	chr1-chr1	118496634	118496120	1	4	1	0
Caki2	SMIM3	ENSG00000237693	chr5-chr5	150158533	150259146	2	2	0	1
AB	LEPROT	LEPR	chr1-chr1	65891060	66031213	1	47	2	63
AB	IDI2-AS1	IDI1	chr10-chr10	1089892	1090189	1	14	0	27
AB	CTSC	RAB38	chr11-chr11	88033697	87883122	2	7	3	0
AB	ENSG00000197774	SPSB3	chr16-chr16	1826496	1826812	1	33	1	67
AB	MLX	PSMC3IP	chr17-chr17	40725138	40725382	2	29	2	24
AB	MRPL33	BRE	chr2-chr2	27994665	28117399	1	8	2	8
AB	PALLD	CBR4	chr4-chr4	169815915	169923221	1	3	4	4
AB	MTMR8	ASB12	chrX-chrX	63548651	63445553	1	3	3	2
AB	MBNL3	RAP2C	chrX-chrX	131563840	131352864	2	7	7	5
ER	LEPROT	LEPR	chr1-chr1	65891060	66023571	2	26	4	10
ER	WDR3	SPAG17	chr1-chr1	118496116	118496713	2	3	2	3
ER	PFKFB3	LOC399715	chr10-chr10	6268327	6368508	8	5	11	6
ER	LOC399715	PRKCQ	chr10-chr10	6368604	6488745	1	3	3	1
ER	C10orf68	ITGB1	chr10-chr10	33039665	33197295	3	3	4	9
ER	BICC1	ENSG00000237949	chr10-chr10	60580227	60760988	5	2	7	3
ER	ENSG00000149021	AHNAK	chr11-chr11	62184321	62302474	4	2	10	0
ER	LOC100506368	TMEM135	chr11-chr11	86669067	86778735	2	2	5	0
ER	CTSC	RAB38	chr11-chr11	88029300	87883122	5	9	6	4
ER	DRAM1	CCDC53	chr12-chr12	102302140	102422963	2	4	3	5
ER	LRRK1	CHSY1	chr15-chr15	101589868	101775286	2	5	2	15
ER	MRPL33	BRE	chr2-chr2	27994665	28117399	2	2	3	3
ER	LOC728730	ENSG00000152154	chr2-chr2	39743681	39892226	12	13	11	2
ER	NDUFV3	PKNOX1	chr21-chr21	44317156	44424435	10	5	16	8
ER	PALLD	CBR4	chr4-chr4	169815915	169923221	5	5	7	1
ER	STARD4-AS1	NREP	chr5-chr5	110917159	111091466	1	14	1	0
ER	AP3S1	AQPEP	chr5-chr5	115205824	115318983	6	3	6	0
ER	FGFR1OP	CCR6	chr6-chr6	167447458	167549525	1	6	4	3
ER	C8orf44-SGK3	SGK3	chr8-chr8	67592258	67705850	5	2	5	7
ER	CA13	CA3	chr8-chr8	86180855	86351940	5	6	5	1
ER	ENSG00000102007	PRICKLE3	chrX-chrX	49031500	49031991	1	12	1	30
ER	ENSG00000150687	FZD4	chr11-chr11	86544454	86665842	1	2	1	0
ER	TVP23C	TVP23C-CDRT4	chr17-chr17	15449098	15341516	2	14	5	1
ER	CHST9	AQP4	chr18-chr18	24604079	24442559	12	6	23	0
ER	CLDN12	ENSG00000058091	chr7-chr7	90034921	90193048	1	3	1	11
ER	FAM122B	PLAC1	chrX-chrX	133915850	133700769	1	3	1	6
FG2	LEPROT	LEPR	chr1-chr1	65891060	66030334	1	40	2	5
FG2	LRRC8B	LRRC8C	chr1-chr1	90050347	90152028	9	4	8	4
FG2	C10orf68	ITGB1	chr10-chr10	33039665	33197295	4	9	7	1
FG2	BICC1	ENSG00000237949	chr10-chr10	60580227	60760988	4	7	6	2
FG2	CTSC	RAB38	chr11-chr11	88029300	87883122	7	48	11	1
FG2	NPAS3	EGLN3	chr14-chr14	34096855	34398281	1	4	2	5
FG2	LRRK1	CHSY1	chr15-chr15	101590983	101775286	3	3	5	11
FG2	LOC728730	ENSG00000152154	chr2-chr2	39743681	39892226	2	5	2	1
FG2	ATF2	CHN1	chr2-chr2	175945387	175816923	1	4	1	3
FG2	PALLD	CBR4	chr4-chr4	169815915	169923221	3	3	3	0
FG2	MBNL3	RAP2C	chrX-chrX	131563840	131352864	3	3	6	3
FG2	CHST9	AQP4	chr18-chr18	24604079	24442559	19	12	38	5
FG2	FAM122B	PLAC1	chrX-chrX	133915850	133700769	1	2	2	2
MF	H6PD	SPSB1	chr1-chr1	9307141	9415801	4	2	7	0
MF	LEPROT	LEPR	chr1-chr1	65891060	66036155	1	33	1	32
MF	LOC100131564	TMED5	chr1-chr1	93804913	93625782	3	6	6	10
MF	GPSM2	CLCC1	chr1-chr1	109472061	109472294	1	4	1	11
MF	ENSG00000150687	FZD4	chr11-chr11	86544454	86665842	1	12	1	3
MF	CTSC	RAB38	chr11-chr11	88033697	87883122	8	6	12	0
MF	DRAM1	CCDC53	chr12-chr12	102302140	102422963	1	2	5	2
MF	TMED3	KIAA1024	chr15-chr15	79606346	79748439	4	3	6	1
MF	LRRK1	CHSY1	chr15-chr15	101589868	101775286	1	19	1	4
MF	CBFB	C16orf70	chr16-chr16	67132638	67169043	13	67	13	83
MF	ZFP90	CDH3	chr16-chr16	68592470	68710287	2	4	2	5
MF	LOC728730	ENSG00000152154	chr2-chr2	39745850	39892226	1	11	6	1
MF	MTMR8	ASB12	chrX-chrX	63564924	63445553	1	4	2	0
MF	LDLRAD3	PRR5L	chr11-chr11	36120010	36350667	1	2	1	1

## Sheet: I
		siRNA designation	Sequence
		Control sense	CGUACGCGGAAUACUUCGA
		Control antisense	UCGAAGUAUUCCGCGUACG
		CTSC-RAB38 sense	AACCAAGGUCAAGAAAGAUU
		CTSC-RAB38 antisense	AAUCUUUCUUGACCUUGGUU
		CTSC-1 sense	AAGGCGGCUUCCCAUACCUUAUU
		CTSC-1 antisense	AAUAAGGUAUGGGAAGCCGCCUU
		CTSC-2 sense	AAUUGUAGGGUAUGCCUU
		CTSC-2 antisense	AAGGCAUACCCUACAAUU
		Rab38-1 sense	AAGUCUCUCUCGUGCGCAGA
		Rab38-1 antisense	UCUGCGCACGAGAGAGACUU
		Rab38-2 sense	AAGACCAGUAUCAUCAAGC
		Rab38-2 antisense	GCUUGAUGAUACUGGUCUU
		SETD2(1)-sense	GCUCCAUCAAAUCGAUUAA
		SETD2(1)-antisense	UUAAUCGAUUUGAUGGAGC
		SETD2(2)-sense	GCAGGACACUAUAUCUAAU
		SETD2(2)-antisense	AUUAGAUAUAGUGUCCUGC
		SETD2(3)-sense	GGUGUAACUUAUGCAUUAA
		SETD2(3)-antisense	UUAAUGCAUAAGUUACACC
		Primer designation	Sequence
		CTSC forward	CAAACCTGCACCACTGACTG
		CTSC reverse	TTGGTTTCGAACAGGACTGACA
		CTSC-RAB38 Intergenic 1 forward	GCCATTCTCACATTCTTATCCACC
		CTSC-RAB38 Intergenic 1 reverse	CACTTTGTGTGGGACCAAGC
		CTSC-RAB38 Intergenic 2 forward	CAGGATCCGACATTGTGAGGT
		CTSC-RAB38 Intergenic 2 reverse	ATCTGTCTGGGGTGGCTACT
		CTSC-RAB38 Intergenic 3 forward	TAGCCTCGTGCAAACAAGGA
		CTSC-RAB38 Intergenic 3 reverse	TGGACAGGTAGAAATGAGAAGTGAG
		RAB38 forward	GTGACCAGGGGAAGGATGTG
		RAB38 reverse	CCTACGAAACCGTGCTCCTT
		Gene desert forward	GGCTAATCCTCTATGGGAGTCTGTC
		Gene desert reverse	CCAGGTGCTCAAGGTCAACATC
		MRPL23 FW	AGAGATCACAGAAACGTGAGGA
		MRPL23 RV	GTCCATCCTGAGCGATCCTG
		SEL1L3 FW	ATTGATCGCCTGGACTGTGC
		SEL1L3 RV	GTGGGATCTCAGTGGAAGTGA
		FAM46A FW	TGGACTTCTTACCCGAGGGG
		FAM46A RV	TGGGGTCTCCTCTCTTACCA
		SETD2 FW	CACCTACTCATGCAGCACCA
		SETD2 RV	CAAGGCCACTGGCTCTGTTA

## Sheet: J
GeneName	Sequence	Sequence Name	Scale	Purification	Three Modification	#A's	#C's	#G's	#T's	Total Bases
MRPL23	aacagacaagctcgaggctg	MRPL23_1	30 nmol	Salt Free	Quasar 570	7	5	6	2	20
MRPL23	gtgtttgcaaatccccaaaa	MRPL23_2	30 nmol	Salt Free	Quasar 570	7	5	3	5	20
MRPL23	cagcaaggtgacttctcgtg	MRPL23_3	30 nmol	Salt Free	Quasar 570	4	5	6	5	20
MRPL23	acataacgaggtgggacagg	MRPL23_4	30 nmol	Salt Free	Quasar 570	7	3	8	2	20
MRPL23	tgctcggaggaaagcaatgg	MRPL23_5	30 nmol	Salt Free	Quasar 570	6	3	8	3	20
MRPL23	agaggagcaaagtccaggac	MRPL23_6	30 nmol	Salt Free	Quasar 570	8	4	7	1	20
MRPL23	gaggacagggacgagtggtg	MRPL23_7	30 nmol	Salt Free	Quasar 570	5	2	11	2	20
MRPL23	tgggagggctggacaggaag	MRPL23_8	30 nmol	Salt Free	Quasar 570	5	2	11	2	20
MRPL23	cacagcattggggaaagaca	MRPL23_9	30 nmol	Salt Free	Quasar 570	8	4	6	2	20
MRPL23	cacgcatggcgagaagtatg	MRPL23_10	30 nmol	Salt Free	Quasar 570	6	4	7	3	20
MRPL23	tgtgtggctggaaggtggag	MRPL23_11	30 nmol	Salt Free	Quasar 570	3	1	11	5	20
MRPL23	ggaagagagaggagttccag	MRPL23_12	30 nmol	Salt Free	Quasar 570	7	2	9	2	20
MRPL23	cagtgtcaggaggtggatgg	MRPL23_13	30 nmol	Salt Free	Quasar 570	4	2	10	4	20
MRPL23	caaagtggcactgtgttctt	MRPL23_14	30 nmol	Salt Free	Quasar 570	4	4	5	7	20
MRPL23	aaagtgtgttgtgaggtggt	MRPL23_15	30 nmol	Salt Free	Quasar 570	4	0	9	7	20
MRPL23	ggcagatggagtgcaatatc	MRPL23_16	30 nmol	Salt Free	Quasar 570	6	3	7	4	20
MRPL23	aggggaaggaattgggagtg	MRPL23_17	30 nmol	Salt Free	Quasar 570	6	0	11	3	20
MRPL23	gagccatagagttgggatgg	MRPL23_18	30 nmol	Salt Free	Quasar 570	5	2	9	4	20
MRPL23	caaggagggaacgggcaatg	MRPL23_19	30 nmol	Salt Free	Quasar 570	7	3	9	1	20
MRPL23	caggaagatccgggattgtg	MRPL23_20	30 nmol	Salt Free	Quasar 570	5	3	8	4	20
MRPL23	ctgaaagaggagggctggtg	MRPL23_21	30 nmol	Salt Free	Quasar 570	5	2	10	3	20
MRPL23	ctgaggaggtggggaggaac	MRPL23_22	30 nmol	Salt Free	Quasar 570	5	2	11	2	20
MRPL23	gtccaagactgcagagaagg	MRPL23_23	30 nmol	Salt Free	Quasar 570	7	4	7	2	20
MRPL23	ttctcactgcgaaggaggag	MRPL23_24	30 nmol	Salt Free	Quasar 570	5	4	7	4	20
MRPL23	ctgagcagggggagaaagaa	MRPL23_25	30 nmol	Salt Free	Quasar 570	8	2	9	1	20
MRPL23	tgtcactggaggttagcatc	MRPL23_26	30 nmol	Salt Free	Quasar 570	4	4	6	6	20
MRPL23	gagggacaggaaggagcatg	MRPL23_27	30 nmol	Salt Free	Quasar 570	7	2	10	1	20
MRPL23	ttggagtctgcagaaagtgc	MRPL23_28	30 nmol	Salt Free	Quasar 570	5	3	7	5	20
MRPL23	agtgtgcaggaggggaacat	MRPL23_29	30 nmol	Salt Free	Quasar 570	6	2	9	3	20
MRPL23	aaggagtctcaaaggagggg	MRPL23_30	30 nmol	Salt Free	Quasar 570	7	2	9	2	20
MRPL23	tgagagacccgagagaaggg	MRPL23_31	30 nmol	Salt Free	Quasar 570	7	3	9	1	20
MRPL23	gaggaagaagggcagggaga	MRPL23_32	30 nmol	Salt Free	Quasar 570	8	1	11	0	20
MRPL23	cagctgctccggaaacagag	MRPL23_33	30 nmol	Salt Free	Quasar 570	6	6	6	2	20
MRPL23	tagaagacgtccatcctgag	MRPL23_34	30 nmol	Salt Free	Quasar 570	6	5	5	4	20
SEL1L3	gggaactgcagcggagattc	SEL1L3_1	30 nmol	Salt Free	Quasar 570	5	4	8	3	20
SEL1L3	ctattgatcgactcaggctg	SEL1L3_2	30 nmol	Salt Free	Quasar 570	4	5	5	6	20
SEL1L3	cactctaagttcaggctcag	SEL1L3_3	30 nmol	Salt Free	Quasar 570	5	6	4	5	20
SEL1L3	ttgcttagtgttatggcatg	SEL1L3_4	30 nmol	Salt Free	Quasar 570	3	2	6	9	20
SEL1L3	gggtttgtaaataatcctga	SEL1L3_5	30 nmol	Salt Free	Quasar 570	6	2	5	7	20
SEL1L3	aggaaattcccttcccagaa	SEL1L3_6	30 nmol	Salt Free	Quasar 570	7	6	3	4	20
SEL1L3	tttgcaatggttcctgtact	SEL1L3_7	30 nmol	Salt Free	Quasar 570	3	4	4	9	20
SEL1L3	tcatgtcaatattgctatct	SEL1L3_8	30 nmol	Salt Free	Quasar 570	5	4	2	9	20
SEL1L3	taccctgagaatgcaattgt	SEL1L3_9	30 nmol	Salt Free	Quasar 570	6	4	4	6	20
SEL1L3	gaagcctaaggtctcagatt	SEL1L3_10	30 nmol	Salt Free	Quasar 570	6	4	5	5	20
SEL1L3	gcttgttccacagtattatt	SEL1L3_11	30 nmol	Salt Free	Quasar 570	4	4	3	9	20
SEL1L3	gtgactctgagattttgtgg	SEL1L3_12	30 nmol	Salt Free	Quasar 570	3	2	7	8	20
SEL1L3	ggtgcccaagtgaaatataa	SEL1L3_13	30 nmol	Salt Free	Quasar 570	8	3	5	4	20
SEL1L3	gctaaatcacagccaaccta	SEL1L3_14	30 nmol	Salt Free	Quasar 570	8	7	2	3	20
SEL1L3	cagctgagtccagcttagat	SEL1L3_15	30 nmol	Salt Free	Quasar 570	5	5	5	5	20
SEL1L3	atacatagagcaagtgtgga	SEL1L3_16	30 nmol	Salt Free	Quasar 570	8	2	6	4	20
SEL1L3	cactgatcccagaagaataa	SEL1L3_17	30 nmol	Salt Free	Quasar 570	9	5	3	3	20
SEL1L3	agatgaacatgcctcacttg	SEL1L3_18	30 nmol	Salt Free	Quasar 570	6	5	4	5	20
SEL1L3	ctttttgccatgagattgct	SEL1L3_19	30 nmol	Salt Free	Quasar 570	3	4	4	9	20
SEL1L3	tgtttgcacagttgtgcttt	SEL1L3_20	30 nmol	Salt Free	Quasar 570	2	3	5	10	20
SEL1L3	acatgatggacgtcttcaaa	SEL1L3_21	30 nmol	Salt Free	Quasar 570	7	4	4	5	20
SEL1L3	cagtgggatctcagtggaag	SEL1L3_22	30 nmol	Salt Free	Quasar 570	5	3	8	4	20
